# Supplementary material for: Microglial depletion disrupts normal functional development of adult-born neurons in the olfactory bulb
Source: PubMed Central journal article supplement (PMC7062469; doi:10.7554/elife.50531), 2020-03-09
Supplement: elife-50531-transrepform.pdf [file elife-50531-transrepform.pdf]

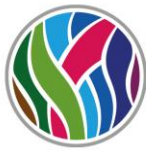

## eLife's transparent reporting form

We encourage authors to provide detailed information *within their submission* to facilitate the interpretation and replication of experiments. Authors can upload supporting documentation to indicate the use of appropriate reporting guidelines for health-related research (see [EQUATOR Network](#)), life science research (see the [BioSharing Information Resource](#)), or the [ARRIVE guidelines](#) for reporting work involving animal research. Where applicable, authors should refer to any relevant reporting standards documents in this form.

If you have any questions, please consult our Journal Policies and/or contact us: [editorial@elifesciences.org](mailto:editorial@elifesciences.org).

### Sample-size estimation

- You should state whether an appropriate sample size was computed when the study was being designed
- You should state the statistical method of sample size computation and any required assumptions
- If no explicit power analysis was used, you should describe how you decided what sample (replicate) size (number) to use

Please outline where this information can be found within the submission (e.g., sections or figure legends), or explain why this information doesn't apply to your submission:

Sample sizes are explained in the Statistical analysis section of the methods.

### Replicates

- You should report how often each experiment was performed
- You should include a definition of biological versus technical replication
- The data obtained should be provided and sufficient information should be provided to indicate the number of independent biological and/or technical replicates
- If you encountered any outliers, you should describe how these were handled
- Criteria for exclusion/inclusion of data should be clearly stated
- High-throughput sequence data should be uploaded before submission, with a private link for reviewers provided (these are available from both GEO and ArrayExpress)

Please outline where this information can be found within the submission (e.g., sections or figure legends), or explain why this information doesn't apply to your submission:

Replicates are described at the beginning of the following methods sections:  
Two photon imaging of odor-evoked responses (Figures 2 and 4)  
Electrophysiology (Figures 6 and 7)  
Inclusion/exclusion of subjects is described in the following methods sections:  
Two photon imaging of odor-evoked responses (Figures 2 and 4)  
Two photon imaging in awake animals (Figure 3)  
Inclusion/exclusion of data is described in the following methods subsections:  
Electrophysiology (Figures 6 and 7) – *Analysis*  
In vivo imaging analysis (Figures 2, 3, 4) – *Fluorescence changes*  
No outliers were excluded so this is not mentioned.

### Statistical reporting

- Statistical analysis methods should be described and justified

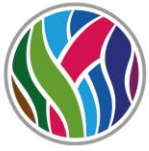

- Raw data should be presented in figures whenever informative to do so (typically when N per group is less than 10)
- For each experiment, you should identify the statistical tests used, exact values of N, definitions of center, methods of multiple test correction, and dispersion and precision measures (e.g., mean, median, SD, SEM, confidence intervals; and, for the major substantive results, a measure of effect size (e.g., Pearson's r, Cohen's d)
- Report exact p-values wherever possible alongside the summary statistics and 95% confidence intervals. These should be reported for all key questions and not only when the p-value is less than 0.05.

Please outline where this information can be found within the submission (e.g., sections or figure legends), or explain why this information doesn't apply to your submission:

The statistical test and p value for each test is found in the legend corresponding to each figure letter. The definition of N is found at the bottom of the legend for each figure. Measures of center (in most cases, the median) are found in the text where the major results are described. Raw data is shown in every figure, in the form of a scatterplot overlaid on a bar graph when N < 40 or as a cumulative distribution otherwise.

(For large datasets, or papers with a very large number of statistical tests, you may upload a single table file with tests, Ns, etc., with reference to sections in the manuscript.)

#### Group allocation

- Indicate how samples were allocated into experimental groups (in the case of clinical studies, please specify allocation to treatment method); if randomization was used, please also state if restricted randomization was applied
- Indicate if masking was used during group allocation, data collection and/or data analysis

Please outline where this information can be found within the submission (e.g., sections or figure legends), or explain why this information doesn't apply to your submission:

Randomization is explained in the Statistical analysis section of the methods. Masking is mentioned in the following methods sections:  
Confocal imaging and quantification  
Electrophysiology (Figures 6 and 7) – Analysis  
In vivo imaging analysis (Figures 2, 3, 4)

#### Additional data files (“source data”)

- We encourage you to upload relevant additional data files, such as numerical data that are represented as a graph in a figure, or as a summary table
- Where provided, these should be in the most useful format, and they can be uploaded as “Source data” files linked to a main figure or table
- Include model definition files including the full list of parameters used
- Include code used for data analysis (e.g., R, MatLab)
- Avoid stating that data files are “available upon request”

Please indicate the figures or tables for which source data files have been provided:

Source data files have been provided for figures 1-7.
