# Supplementary material for: Microglial depletion disrupts normal functional development of adult-born neurons in the olfactory bulb
Source: eLife. 2020 Mar 9;9:e50531. doi: 10.7554/eLife.50531 (PMC7062469; doi:10.7554/eLife.50531)
Supplement: Figure 1—source data 1. [file elife-50531-fig1-data1.xlsx]

## Sheet: Sheet 1
Wallace et al.
Microglia depletion disrupts normal functional development of adult-born neurons in the olfactory bulb
Figure 1-source data 1
Each row corresponds to one part of the figure and contains the mean across all dendrites in either the real data (first column) or each individual offset (subsequent columns).
Figure part	Description	Data	Offsets (1-231)
D	Mushroom: Proportion of spines with interactions	0.384615	0.384615	0.380952	0.373626	0.355311	0.362637	0.344322	0.3663	0.3663	0.333333	0.344322	0.347985	0.333333	0.333333	0.311355	0.274725	0.296703	0.32967	0.311355	0.307692	0.315018	0.304029	0.315018	0.336996	0.322344	0.336996	0.358974	0.3663	0.384615	0.3663	0.336996	0.318681	0.282051	0.296703	0.322344	0.32967	0.315018	0.336996	0.369963	0.358974	0.351648	0.326007	0.344322	0.347985	0.326007	0.304029	0.322344	0.322344
E	Mushroom: Number of interactions per 10 min	0.147326	0.135445	0.130351	0.124026	0.122804	0.117956	0.107588	0.103439	0.110975	0.105272	0.13268	0.134229	0.130418	0.112334	0.110015	0.090328	0.102454	0.119707	0.112242	0.116616	0.10359	0.118744	0.116697	0.111293	0.117303	0.132304	0.134511	0.138883	0.130609	0.121769	0.1038	0.0947146	0.0973091	0.10719	0.113228	0.103108	0.0965901	0.0931369	0.103316	0.115536	0.111945	0.106655	0.128664	0.1328	0.122435	0.103084	0.105682	0.111209
F	Mushroom: Interaction length	5.12349	5.43902	5.46638	6.84286	7.4904	6.9025	7.26501	7.60887	7.38565	6.52822	7.32396	7.65868	8.29333	6.80603	7.09934	7.37202	7.14757	5.97217	7.04467	8.27642	10.3399	7.42024	6.81824	5.92321	6.0884	7.36875	5.85337	6.47078	7.84637	8.14391	7.87343	6.29229	6.82155	6.16825	5.95546	5.12618	5.3451	5.5918	5.84253	5.79815	5.18839	6.06371	5.35177	6.57599	6.515	7.32788	6.11044	6.35051
G	Mushroom: Percent coverage	27.3331	28.2704	25.7358	32.4562	34.9966	30.5857	26.8938	29.2357	29.7863	27.5427	31.2477	37.3305	35.096	29.0549	28.5158	27.1814	32.4198	33.689	29.957	29.0846	30.5806	32.1931	32.6008	24.5292	24.7448	28.7018	25.7893	28.0724	31.9653	29.8768	26.3105	26.522	28.8419	27.996	26.5906	25.2306	30.0461	26.5479	25.7189	26.2403	23.3702	26.4384	27.6661	27.7242	23.8766	26.9701	22.4003	23.1474
I	Filopodia: Proportion of spines with interactions	0.271523	0.291391	0.300221	0.282561	0.282561	0.271523	0.280353	0.282561	0.282561	0.289183	0.256071	0.267108	0.271523	0.249448	0.271523	0.271523	0.256071	0.249448	0.247241	0.267108	0.269316	0.278146	0.278146	0.282561	0.256071	0.253863	0.269316	0.269316	0.260486	0.258278	0.264901	0.258278	0.267108	0.275938	0.275938	0.269316	0.271523	0.256071	0.258278	0.260486	0.229581	0.231788	0.245033	0.247241	0.238411	0.249448	0.267108	0.269316
J	Filopodia: Number of interactions per 10 min	0.0984175	0.120971	0.116864	0.108207	0.101072	0.0932017	0.106795	0.108812	0.104095	0.116328	0.129611	0.115861	0.135677	0.112704	0.117818	0.120245	0.134931	0.106215	0.102397	0.103611	0.110763	0.114393	0.103059	0.115539	0.108248	0.103889	0.108777	0.105494	0.097398	0.0952383	0.108866	0.134241	0.115283	0.120286	0.124245	0.119422	0.102289	0.0963116	0.112416	0.112293	0.0832708	0.0840286	0.090246	0.0946936	0.103948	0.0980658	0.108403	0.103668
K	Filopodia: Interaction length	6.95557	6.58257	5.87238	6.10349	5.53085	6.17195	6.43491	7.31941	6.19286	6.40603	6.22599	6.17583	5.51322	7.54493	6.53547	6.77723	6.20517	6.64363	6.91591	5.41548	6.41243	5.94748	6.90347	6.40355	6.31231	6.39122	6.12355	6.24022	7.63177	6.3542	7.03633	7.58952	6.91762	5.78583	6.4538	5.97973	5.70861	7.20103	6.51025	5.08327	6.31115	5.67344	6.11301	6.38792	6.01342	6.96197	7.64988	7.3778
L	Filopodia: Percent coverage	32.862	36.7558	36.6723	38.6128	38.3712	40.4584	39.9755	42.5579	31.1998	37.5963	38.0904	39.4482	33.3207	40.4464	35.6471	40.359	31.8028	35.2609	35.1669	29.4203	39.9981	37.3176	37.6051	35.3396	37.227	45.8508	37.9932	34.2042	41.9526	37.0951	37.109	39.608	35.8862	33.7327	36.9194	37.2052	35.0874	34.8969	34.445	33.3467	37.1632	34.7441	35.8899	35.5549	36.3323	36.3855	40.9474	34.4522
[truncated: 184 more columns]
