# Supplementary material for: Microglial depletion disrupts normal functional development of adult-born neurons in the olfactory bulb
Source: eLife. 2020 Mar 9;9:e50531. doi: 10.7554/eLife.50531 (PMC7062469; doi:10.7554/eLife.50531)
Supplement: Figure 2—source data 1. [file elife-50531-fig2-data1.xlsx]

## Sheet: Part F
Wallace et al.
Microglia depletion disrupts normal functional development of adult-born neurons in the olfactory bulb
Figure 2-source data 1
Each row is one mouse and each column is the mean across odors for one dendrite.
Control
0.127561	0.300795	0.0898914	0.0619635	0.0956643	0.0584307	0.0915886	0.158468	3.40996	0.12276	0.157674	0.0821646	0.229303	0.117215	0.132172	0.0976986	0.158416	0.246929	0.106762	0.10993	0.10748	0.172663	0.169375	0.0744122	0.284214	0.193056	0.732411	-0.0448303	0.00617183	-0.058182	-0.0224028	0.0038133	-0.0563568	-0.0507899	-0.066703	1.06402	-0.0185674	-0.0366718	0.0646426	-0.0666689	1.12852	0.169927	0.852209	1.56618	0.10993	0.815752	0.118908	0.0473679	0.216912	0.469189
0.727871	0.468144	1.65977	0.179242	0.271676	0.536831	2.37764	1.95316	2.34471	1.6722	0.369443	0.713201	2.59698	0.135921	0.131592	0.763833	4.99303	0.267135	2.38255	0.683352	0.202768	0.0662201	0.0776792	0.0727207	0.244563	0.207934	0.288563	0.12979	0.0509294	0.0961172	0.0511285	0.149234	0.260933	0.0815598	0.273192	0.116319	0.0383386	0.0894961	0.181656	0.78051	0.0737717	0.171631	0.977433	0.0481939	0.356319	0.139167	0.39119	0.182857	0.0891084	0.735446
0.113758	0.783567	0.708435	0.379894	0.0889522	0.466695	0.328007	0.453881	0.707712	2.68301	0.593186	0.18106	1.57331	0.254504	-0.110219	0.275935	0.184214	1.03436	0.508093	0.168769	0.125825	0.834169	0.19311	0.605868	0.0686182	0.0466702	0.0597095	0.119941	0.342222	0.431741	0.337366	0.174526	0.0792039	0.435498	0.251276	0.171769	0.0745524	0.0450268	0.224888	0.133565	0.465187	0.920805	0.0986755	0.121784	0.0618428	1.08998	0.558973	0.93976	0.847832	1.17126
0.0619511	0.295134	0.293963	0.0801608	0.105029	0.67234	0.163566	0.209423	0.145079	0.135387	1.40302	0.0199371	0.476851	0.463672	0.172309	0.144496	0.471076	0.560745	0.0814523	0.523799	0.0682923	1.33417	0.0723108	0.344738	0.688897	0.065568	0.261159	0.0392662	0.164588	0.096139	0.175633	0.0575194	0.161559	0.0491697	0.0245823	0.104141	0.152281	0.489694	0.0655642	0.0934637	0.216339	0.160006	0.280013	0.356337	0.139867	0.198968	0.0280005	0.303249	0.303025	0.204511
0.193177	0.261938	0.104904	0.217401	0.0899507	0.0621016	0.102629	0.0915776	1.98731	0.0525122	0.208856	0.535444	0.237257	0.0563762	0.104653	0.05547	0.518717	0.448213	0.107237	0.221041	0.126318	0.437257	0.0477865	0.257459	0.306477	0.112409	0.233904	0.205299	0.0680566
PLX
0.136738	0.0518038	0.0574047	0.136053	0.112791	0.16085	0.295848	0.0767176	0.170449	0.796225	0.444874	0.482571	0.593903	0.270915	0.192621	0.213924	1.44609	0.259167	0.0495035	0.163267	-0.0186261	0.00917882	0.0644123	0.0653231	-0.066792	-0.0513903	0.0542672	0.0265712	0.021957	0.0145259	0.0158256	0.039888	0.0600107	0.0515636	0.154428	-0.0932987	-0.0703109	0.0558337	0.137064	0.00822663	-0.0435795	0.0512672	0.117746	0.0780641	-0.0013718	-0.035502	0.00480292	-0.040758	0.140037	0.0876004
0.329071	0.346251	0.22433	-0.00128586	0.03221	0.0775653	0.0820254	0.0462132	0.0250748	-0.0527694	0.596342	0.0401861	0.496806	-0.0140777	0.145169	0.539835	0.251319	0.0041511	0.606642	0.73831	0.116316	0.00732595	0.24315	0.319804	0.0224586	0.210151	0.0953089	0.219332	0.122348	0.54596	0.106984	0.331058	0.30755	0.0758845	1.09416	0.29606	0.135106	0.419894	0.127243	0.784939	0.320685
0.320685	0.100235	-0.0137468	-0.0956547	0.783728	0.512949	0.0989932	0.0860202	-0.183545	0.470315	0.673388	0.539421	0.26221	0.515817	0.0619811	0.238385	-0.00281898	0.0520063	-0.0666015	-0.0142654	-0.00154698	0.0507699	-0.0387046	-0.0847015	-0.0910852	-0.000247896	-0.0342488	-0.0459063
-0.0459063	-0.016599	-0.0126986	0.0815773	0.0609014	-0.00526914	0.34437	0.0826176	0.0291387	0.036071	0.112128	0.0687862	0.00657476	0.043475	0.0980668	0.177313	0.0482533	0.0320657	0.237668	0.0456543	0.295465	0.131522	0.0672976	0.460121	-0.0283114	0.0791904	1.46702	0.146683	0.341556	0.0595592	0.0942279	2.37211	0.901922	0.330003	1.51884	0.689127	0.147874	0.233877	0.0451166	0.493064	-0.044258	0.0656395	0.104985	0.0119394	0.165682	-0.0415639	0.139645	0.136672	-0.00208991	0.264151
-0.00325213	0.185357	0.134889	0.169276	1.98453	0.168199	1.05302	1.42445	1.36931	0.129624	0.0661119	1.00907	0.150615	0.0258126	0.0540855	0.28498	0.0557143	-0.0284336	0.0941952	0.0427022	-0.0750058	0.109102	0.0280244
0.0280244	-0.059272	0.0607226	0.0412667	0.0474587	0.00742839	0.833586	0.0645993	2.57814	0.403812	0.269361	0.200284	0.20521	2.82032	1.55995	0.0108845	0.873326	1.53499	0.677106	2.86394	-0.0171085	-0.034924	0.0226359	0.0132484	0.013849	-0.030863	0.0357312	-0.0244185	-0.00318835	0.113346	0.121703	1.1175	1.22388	1.51524	0.785501	0.205238	0.0747898	0.048658	0.0219142	0.111765	0.359403	-0.0252244
-0.0252244	0.0500703	0.057422	0.168571	0.0734274	-0.0733981	0.890215	0.281084	0.315775	0.351946	1.26101	2.15915	0.634675	0.0940571	0.9705	1.33494	1.52581	-0.0325494	0.0430294	-0.0181644	-0.0106706	-0.00495469	-0.00668888	0.17776
[truncated: 36 more columns]

## Sheet: Part G
Wallace et al.
Microglia depletion disrupts normal functional development of adult-born neurons in the olfactory bulb
Figure 2-source data 1
Each row is one mouse and each column is the number of effective odors for one dendrite.
Control
1	5	0	1	0	1	1	3	8	2	3	1	3	0	2	1	2	5	3	3	2	2	2	2	4	3	6	0	0	0	0	0	0	0	0	7	0	0	0	0	7	3	7	7	1	7	3	2	4	6
4	7	9	4	5	8	9	8	10	9	7	8	10	1	1	9	10	5	10	9	3	0	1	1	4	3	5	1	2	1	1	2	5	3	5	0	0	1	1	9	1	1	8	0	5	1	7	4	0	6
0	9	6	8	2	8	6	6	6	8	7	2	9	7	0	3	4	9	7	4	1	9	5	8	1	1	1	1	5	7	5	5	1	7	5	3	1	0	4	2	6	9	1	1	1	9	8	9	9	11
1	4	4	1	1	8	2	2	1	4	7	0	8	8	2	1	5	7	0	5	0	9	0	7	9	1	5	0	2	1	3	0	3	2	1	2	2	5	0	0	5	2	4	5	0	4	1	5	4	3
3	4	2	5	3	0	1	1	12	0	5	7	4	1	1	2	4	4	2	3	2	5	1	4	5	3	4	3	1
PLX
1	0	0	2	2	2	7	0	3	7	6	6	10	5	4	3	9	4	1	3	0	0	1	1	0	0	0	1	1	0	0	1	1	1	4	0	0	2	4	0	1	0	1	3	0	0	0	1	1	2
4	5	4	0	1	2	0	3	1	1	7	2	7	0	2	8	4	1	9	8	1	0	5	7	0	5	2	4	0	8	3	5	4	0	7	3	3	4	2	10	5
5	0	0	0	7	8	2	1	0	8	9	5	5	7	2	2	0	1	0	0	0	1	0	0	0	0	0	0
0	0	1	0	0	0	4	1	0	0	1	1	0	1	1	2	1	1	3	0	3	2	0	6	0	3	12	1	6	3	8	7	9	7	3	3	2	8	0	1	2	0	2	0	4	3	0	5	5	8
0	4	1	3	12	1	11	12	11	1	1	9	2	0	1	5	0	0	0	0	0	0	0
0	0	0	0	0	1	7	1	7	6	6	3	4	7	7	1	7	7	6	7	2	0	2	1	0	0	0	1	1	0	0	8	9	9	8	5	0	1	3	3	5	1
1	0	3	3	0	1	10	5	4	6	4	7	10	2	4	4	12	0	1	0	0	0	0	4
[truncated: 36 more columns]

## Sheet: Part H
Wallace et al.
Microglia depletion disrupts normal functional development of adult-born neurons in the olfactory bulb
Figure 2-source data 1
Each row is one mouse and each column is the lifetime sparseness for one dendrite.
Control
0.0666667	0.301281	0	0.0666667	0	0.0666667	0.0666667	0.188426	0.399908	0.130453	0.190659	0.0666667	0.195513	0	0.133159	0.0666667	0.132085	0.30909	0.192544	0.182473	0.133043	0.133004	0.133038	0.133312	0.241072	0.196931	0.359974	0	0	0	0	0	0	0	0	0.378806	0	0	0	0	0.387785	0.18844	0.380404	0.380629	0.0666667	0.392088	0.198066	0.133221	0.260044	0.328934
0.199022	0.411523	0.49848	0.260646	0.31862	0.452542	0.507944	0.486374	0.490704	0.506435	0.433894	0.422089	0.55954	0.0666667	0.0666667	0.49375	0.537255	0.319395	0.550567	0.518608	0.185391	0	0.0666667	0.0666667	0.264784	0.193972	0.323557	0.0666667	0.132403	0.0666667	0.0666667	0.13068	0.323498	0.197547	0.313632	0	0	0.0666667	0.0666667	0.540584	0.0666667	0.0666667	0.423642	0	0.294559	0.0666667	0.3989	0.256494	0	0.252496
0	0.434558	0.334908	0.494077	0.129009	0.442583	0.392371	0.344428	0.323539	0.367032	0.405988	0.131344	0.374344	0.432154	0	0.175537	0.263315	0.504993	0.383589	0.257174	0.0666667	0.512394	0.280567	0.42261	0.0666667	0.0666667	0.0666667	0.0666667	0.303678	0.435068	0.305069	0.300641	0.0666667	0.426151	0.31256	0.196904	0.0666667	0	0.249234	0.121168	0.374781	0.557463	0.0666667	0.0666667	0.0666667	0.524076	0.498493	0.512604	0.501701	0.60566
0.0666667	0.256525	0.253086	0.0666667	0.0666667	0.411807	0.127879	0.131719	0.0666667	0.26358	0.408109	0	0.482839	0.505391	0.128217	0.0666667	0.312877	0.36497	0	0.278015	0	0.429917	0	0.414319	0.532887	0.0666667	0.316357	0	0.127644	0.0666667	0.19685	0	0.187019	0.133109	0.0666667	0.132156	0.130704	0.241049	0	0	0.318369	0.133253	0.218813	0.310132	0	0.26474	0.0666667	0.315586	0.210905	0.194596
0.193231	0.234278	0.122145	0.324876	0.1944	0	0.0666667	0.0666667	0.655115	0	0.324919	0.39052	0.250053	0.0666667	0.0666667	0.130355	0.234093	0.225526	0.132815	0.179348	0.12932	0.260334	0.0666667	0.260774	0.305248	0.198537	0.261842	0.188295	0.0666667
PLX
0.0666667	0	0	0.132859	0.133312	0.129988	0.423579	0	0.199036	0.383801	0.346356	0.348399	0.496449	0.308795	0.258232	0.197834	0.458425	0.248818	0.0666667	0.185023	0	0	0.0666667	0.0666667	0	0	0	0.0666667	0.0666667	0	0	0.0666667	0.0666667	0.0666667	0.263379	0	0	0.128601	0.24915	0	0.0666667	0	0.0666667	0.197806	0	0	0	0.0666667	0.0666667	0.13333
0.247315	0.28993	0.233866	0	0.0666667	0.133217	0	0.195288	0.0666667	0.0666667	0.405022	0.132922	0.394618	0	0.133325	0.37906	0.235616	0.0666667	0.493813	0.324504	0.0666667	0	0.330538	0.448081	0	0.31394	0.12821	0.2645	0	0.489012	0.194494	0.25042	0.244422	0	0.375771	0.175157	0.194448	0.207741	0.132813	0.495634	0.326013
0.326013	0	0	0	0.388379	0.463477	0.129567	0.0666667	0	0.433812	0.560382	0.192855	0.325381	0.206988	0.123367	0.0876176	0	0.0666667	0	0	0	0.0666667	0	0	0	0	0	0
0	0	0.0666667	0	0	0	0.253166	0.0666667	0	0	0.0666667	0.0666667	0	0.0666667	0.0666667	0.123926	0.0666667	0.0666667	0.184977	0	0.179294	0.128804	0	0.30008	0	0.193383	0.633632	0.0666667	0.330709	0.190382	0.197876	0.306947	0.53454	0.42758	0.34628	0.363072	0.183709	0.120829	0.131909	0.459492	0	0.0666667	0.133015	0	0.132915	0	0.264535	0.196552	0	0.318207
0	0.256846	0.0666667	0.180681	0.55029	0.0666667	0.622373	0.557053	0.550427	0.0666667	0.0666667	0.520103	0.133333	0	0.0666667	0.311149	0	0	0	0	0	0	0
0	0	0	0	0	0.0666667	0.41627	0.0666667	0.424213	0.3075	0.377217	0.176547	0.236727	0.400146	0.432493	0.0666667	0.423311	0.393353	0.377007	0.353987	0.131792	0	0.133193	0.0666667	0	0	0	0.0666667	0.0666667	0	0	0.449278	0.454027	0.457418	0.458626	0.312721	0	0.0666667	0.191024	0.174652	0.317733	0.0666667
0.0666667	0	0.194162	0.196278	0	0.0666667	0.461104	0.26512	0.241034	0.27371	0.191662	0.304695	0.442069	0.133245	0.194746	0.204029	0.640647	0	0.0666667	0	0	0	0	0.225716
[truncated: 36 more columns]
