# Supplementary material for: Microglial depletion disrupts normal functional development of adult-born neurons in the olfactory bulb
Source: eLife. 2020 Mar 9;9:e50531. doi: 10.7554/eLife.50531 (PMC7062469; doi:10.7554/eLife.50531)
Supplement: Figure 3—source data 1. [file elife-50531-fig3-data1.xlsx]

## Sheet: Part B
Wallace et al.
Microglia depletion disrupts normal functional development of adult-born neurons in the olfactory bulb
Figure 3-source data 1
Each row is the mean across odors for one dendrite.
Control	PLX
0.0182509	0.220561
6.75679	-0.153447
0.116402	-3.802
1.20137	-1.97125
-0.0420818	-0.0336139
2.51105	-0.0341335
0.811599	-0.0268406
0.185929	-0.709205
1.93836	0.248832
0.0223767	0.449256
0.139909	0.565373
2.39809	-1.3832
0.727116	0.0229845
2.23032	-0.61936
3.65653	-0.21089
-0.0835361	-0.0929555
3.45711	-0.0475003
-0.441615	-0.171962
1.15916	-0.0241356
-0.11668	-0.0557317
-0.231402	-0.324189
0.0405938	0.0214723
0.171924	-0.0340182
1.00295	-0.117755
0.0334015	0.695964
0.0908031	-0.116251
0.291845	-0.0452508
1.8336	-0.0988871
-0.0440233	0.0697276
2.22519	0.132836
-1.69181	0.11872
-0.784954	0.881134
-0.112154	-0.112772
0.166327	-0.0866842
3.37216	-0.078965
-0.0651289	-0.0909277
-0.0139261	-0.304142
-0.902558	-0.0475733
0.980622	0.162821
0.388764	-0.0398361
0.847145	-0.00673586
0.207475	0.00200861
0.0714326	0.0375891
0.0536963	-0.0315589
0.642518	0.114972
3.70075	-0.13936
1.01624	-0.0269414
-0.180847	-0.0800115
0.2071	-0.100416
0.11803	-0.183579
-0.0326671	-0.0220947
0.0196622	0.0147948
-0.164996	-0.0262793
0.663988	0.130676
-0.104887	-0.0535422
0.0544485	-0.03845
0.944865	1.03921
0.465943	0.10048
0.258517	-0.0325169
-0.248674	0.0266405
0.0718251	0.119834
1.23229	0.0152729
0.830337	-0.0565189
0.325186	-0.0930969
-0.0631461	0.0156405
0.0352232	0.449448
0.397312	0.216288
0.0619058	-0.0460158
-0.0918453	-0.0457008
0.0974831	0.457086
-0.131503	3.21343
0.478158	0.6186
-0.0599863	1.25433
0.0115684	1.20036
0.112495	0.437311
0.00595195	0.65689
-0.0299124	1.226
-0.0677663	-0.0373584
-0.170212	0.0373604
0.0494956	0.0989001
-0.119859	-0.24564
-0.0786853	1.38767
-0.0277402	0.169898
-0.388789	-0.114079
-0.0993123	0.00751444
0.020462	0.563456
0.0190369	-0.0240761
-0.270276	0.00648593
0.0438618	0.0704724
0.00477792	0.0639342
-0.128599	-0.113192
-0.0732498	1.58202
0.52228	1.87837
0.571023	-0.346309
0.589296	0.992903
0.244949	2.15192
0.00011484	1.16822
0.170324	-0.173779
0.00961599	1.33004
0.64629	1.758
-0.290381	1.89547
-0.0708169	0.00131724
0.491467	-0.178094
0.551683	-0.0623738
0.102993	0.0449317
	0.00695509
	0.296981
	-0.0859527
	2.9893
	0.101379
	0.249424
	0.219623
	0.324126
	6.05972
	0.000508755
	0.00943028
	-0.123435
	0.475508
	-0.0410129
	-0.195574
	-0.0315866
	-0.0860899
	-0.0184005
	-0.0947534
	0.27752
	-0.0798643
	-0.0584555
	0.0220824
	0.16559
	0.169783
	0.135447
	0.0954871

## Sheet: Part C
Wallace et al.
Microglia depletion disrupts normal functional development of adult-born neurons in the olfactory bulb
Figure 3-source data 1
Each row is the number of effective odors for one dendrite.
Control	PLX
0	0
15	0
3	0
6	0
0	0
14	0
8	0
0	0
6	4
2	5
1	7
6	0
5	0
7	0
14	0
0	1
14	0
0	0
12	0
1	0
0	0
0	0
4	0
10	0
0	11
2	0
4	0
11	0
0	1
12	2
0	1
0	8
0	2
0	0
12	1
0	0
0	3
0	1
10	2
5	1
7	0
4	0
0	0
2	0
7	1
11	0
8	0
1	0
1	0
0	0
0	0
0	0
0	0
10	1
1	2
0	2
12	9
3	1
4	2
0	0
1	2
6	0
7	0
4	0
0	0
1	5
4	3
2	0
0	0
3	5
0	11
6	6
0	6
1	11
2	6
0	8
0	10
0	0
1	0
0	0
0	1
0	10
0	1
0	0
0	0
0	9
0	0
0	0
0	0
0	0
0	0
0	9
5	10
7	0
6	10
3	10
2	9
3	2
0	10
3	9
1	10
0	1
8	0
3	1
1	0
	0
	4
	0
	12
	2
	3
	3
	4
	13
	0
	0
	0
	5
	1
	0
	0
	0
	0
	0
	1
	0
	0
	1
	2
	0
	1
	1

## Sheet: Part D
Wallace et al.
Microglia depletion disrupts normal functional development of adult-born neurons in the olfactory bulb
Figure 3-source data 1
Each row is the lifetime sparseness for one dendrite.
Control	PLX
0	0
0.844339	0
0.198759	0
0.277382	0
0	0
0.851955	0
0.432601	0
0	0
0.281842	0.219774
0.0983995	0.315001
0.0666667	0.436981
0.275366	0
0.264709	0
0.308062	0
0.854857	0
0	0.0666667
0.854423	0
0	0
0.744812	0
0.0666667	0
0	0
0	0
0.233798	0
0.491935	0
0	0.65429
0.108593	0
0.245613	0
0.495592	0
0	0.0666667
0.528635	0.12931
0	0.0666667
0	0.343087
0	0.132019
0	0
0.492252	0.0666667
0	0
0	0.191742
0	0.0666667
0.566728	0.101228
0.296184	0.0666667
0.390076	0
0.256989	0
0	0
0.13327	0
0.349003	0.0666667
0.566859	0
0.340051	0
0.0666667	0
0.0666667	0
0	0
0	0
0	0
0	0
0.619178	0.0666667
0.0666667	0.13312
0	0.117159
0.677982	0.548326
0.181764	0.0666667
0.251672	0.131041
0	0
0.0666667	0.131792
0.277135	0
0.403657	0
0.237487	0
0	0
0.0666667	0.161012
0.197248	0.166731
0.130118	0
0	0
0.175235	0.296668
0	0.386554
0.381357	0.350397
0	0.248615
0.0666667	0.362555
0.133019	0.322224
0	0.466698
0	0.349667
0	0
0.0666667	0
0	0
0	0.0666667
0	0.381326
0	0.0666667
0	0
0	0
0	0.562779
0	0
0	0
0	0
0	0
0	0
0	0.566209
0.289725	0.59496
0.385296	0
0.32285	0.58033
0.182589	0.608809
0.131673	0.573662
0.193027	0.112077
0	0.609633
0.170691	0.55976
0.0666667	0.594201
0	0.0666667
0.423201	0
0.175955	0.0666667
0.0666667	0
	0
	0.256014
	0
	0.450555
	0.106291
	0.196737
	0.173096
	0.197371
	0.478368
	0
	0
	0
	0.269801
	0.0666667
	0
	0
	0
	0
	0
	0.0666667
	0
	0
	0.0666667
	0.116084
	0
	0.0666667
	0.0666667
