# Supplementary material for: Microglial depletion disrupts normal functional development of adult-born neurons in the olfactory bulb
Source: eLife. 2020 Mar 9;9:e50531. doi: 10.7554/eLife.50531 (PMC7062469; doi:10.7554/eLife.50531)
Supplement: Figure 4—source data 1. [file elife-50531-fig4-data1.xlsx]

## Sheet: Part C
Wallace et al.
Microglia depletion disrupts normal functional development of adult-born neurons in the olfactory bulb
Figure 4-source data 1
Each row is the mean across odors for one dendrite.
Control	PLX
0.0319421	0.0271798
0.572096	0.705929
0.117427	0.0513975
0.0756642	0.167348
0.260233	0.205097
0.299108	0.0205543
0.381819	0.145559
0.551804	0.1259
0.145951	0.120833
0.155935	0.0519579
0.122763	0.148854
0.252911	1.506
0.715648	0.0659446
0.126203	0.132067
1.66771	0.0995916
0.863843	0.759351
0.145514	0.527983
0.31025	0.0675348
0.813273	0.210341
0.522249	0.10127
0.79349	0.666515
0.134513	0.345341
0.756935	0.480198
1.11785	0.496067
0.0926234	0.442298
0.88071	0.0140837
2.33566	0.110962
0.154929	0.3246
1.06693	0.575905
0.0642309	0.123912
0.109249	-0.123285
0.126653	0.257526
0.0586495	0.347882
0.138867	0.103673
0.245892	0.20793
0.190099	0.108702
0.0946671	0.08156
0.706691	0.0828042
0.160969	0.258631
0.165048	0.434234
0.0387663	0.0350281
0.310052	0.0536477
0.226221	-0.405679
0.0580932	0.0827188
-0.0022017	0.0489792
0.380968	0.0561337
0.224043	0.113293
0.223165	0.384345
0.166388	0.328639
0.495969	0.12717
0.147062	0.107057
0.0457804	0.247956
-0.165242	0.173766
0.0617886	0.1321
0.121167	0.668444
0.0574418	1.79484
-0.339322	0.389231
0.195101	-0.015276
0.354253	0.142193
0.143052	1.68678
0.152218	0.406662
0.375322	0.42356
0.0657523	0.636616
0.456044	0.0631175
0.0659382	0.27896
0.261267	0.980925
0.15477	0.0631809
0.668761	0.0645897
0.107849	0.382105
0.066332	1.23951
0.410606	1.42481
0.245878	0.317731
0.345424	0.521945
0.280421	0.26759
0.0390021	1.14011
0.0881252	0.640207
1.42832	-0.433671
0.0837265	0.303408
1.06311	0.490765
0.209513	1.26844
-0.0165276	0.542179
-0.562962	0.0700309
-0.32885	0.061827
0.141966	0.129199
0.5403	0.0937529
0.195247	0.322867
0.0858161	0.133839
0.303041	0.0633819
0.547266	0.15634
0.140836	0.106299
0.207685	0.177386
2.07437	0.0209736
0.124439	0.393831
0.489616	0.0511614
1.01826	0.180041
0.0899369	0.155101
0.0333467	0.73443
0.0551136	0.112722
0.239019	1.53085
0.118431	0.0863583
0.37664	1.10963
0.0838136	0.136394
0.0401234	0.346021
0.740899	0.485536
0.120906	0.0489737
0.150452	0.0250522
0.412677	0.247737
0.0768527	0.304564
0.336935	0.129689
0.468933	0.397054
0.634919	0.120649
0.469039	-0.413466
0.234891	0.329173
0.0954364	0.203007
1.32574	0.154621
0.115294	0.0116933
0.0622161	0.0365393
0.357147	0.791052
0.128161	0.143092
0.966728	0.193172
0.101017	0.772912
0.139517	0.125132
2.09067	0.337401
0.226307	1.21204
1.84715	0.0623132
0.115247	0.126766
0.119845	0.163934
0.132901	0.0177165
1.01442	1.32214
0.0410295	0.135956
0.168563	0.812535
0.121491	0.444529
0.328148	0.130452
0.2561	0.449078
0.202993	0.065041
0.151307	0.135128
0.253737	0.703835
0.281889	0.253672
0.142421	0.129075
0.176302	0.325805
0.971674	0.272579
0.179609	2.67125
0.176481	0.136791
0.147946	0.0572005
0.47617	0.373566
2.07383	0.102467
0.136667	0.282226
2.70995	0.228094
0.125624	0.29193
0.241753	0.36791
1.12989	1.82143
0.149104	0.132468
0.0397748	0.438173
0.108853	0.0905507
0.10017	0.293615
-0.00455054	-0.00891047
1.12314	-0.0378913
0.887266	-0.0486098
1.40476	0.0397173
1.30213	2.40562
1.53546	0.145457
0.0158623	-0.0477199
0.902646	0.0736392
0.813676	0.0423319
0.0795078	3.97496
0.35987	0.280222
0.64727	-0.215373
0.0756593	1.9733
0.0733031	-0.283112
0.154394	0.257936
0.168714	-0.0324815
0.0567861	1.95137
0.030515	0.155803
-0.0227624	2.57349
0.695016	0.134504
0.0698048	0.0236323
0.0139028	0.62449
0.0562226	7.31254
0.16474	0.323031
1.27003	0.480662
0.187126	2.77777
0.402665	1.21071
0.295765	0.641348
2.57955	0.083629
0.653401	0.0843457
2.11827
1.4794
0.556962
1.5891
1.15342
0.45321
8.99269
0.310301
0.380014
2.14702
0.352931
0.0932374
0.00805526

## Sheet: Part D
Wallace et al.
Microglia depletion disrupts normal functional development of adult-born neurons in the olfactory bulb
Figure 4-source data 1
Each row is the number of effective odors for one dendrite.
Control	PLX
0	0
7	6
0	0
0	0
4	2
3	0
4	1
8	0
0	0
0	0
1	0
2	13
6	0
1	0
6	0
7	7
1	6
4	0
9	1
8	0
8	9
0	4
8	8
5	6
0	4
7	0
9	0
0	2
8	8
0	2
0	0
0	2
0	3
0	0
4	2
0	1
0	1
5	0
0	3
1	8
1	0
4	0
1	0
0	0
0	0
4	1
1	0
2	6
0	5
8	0
0	1
0	4
0	2
0	1
0	8
0	8
0	6
2	0
3	0
0	7
0	4
5	5
0	7
5	1
0	3
4	5
2	0
7	0
1	5
1	8
6	8
2	4
5	4
3	3
0	7
0	5
7	0
1	3
6	4
3	10
0	5
0	0
0	0
0	0
5	0
1	2
0	0
3	0
4	1
1	0
3	2
8	0
0	4
4	0
7	1
0	2
0	5
0	0
1	11
1	1
5	10
0	1
0	5
6	5
0	1
0	0
7	3
0	3
4	0
5	4
5	1
6	0
2	4
0	1
9	2
0	0
0	0
3	9
1	1
8	4
0	6
0	0
8	1
2	11
8	0
1	0
0	1
0	0
9	7
0	0
2	7
0	4
6	0
2	4
0	0
0	1
3	6
4	3
0	1
2	4
8	3
0	10
2	0
0	1
6	5
8	1
1	3
15	2
0	3
1	4
8	11
0	0
0	3
0	0
0	4
0	0
5	0
8	0
6	0
6	9
6	0
0	0
8	0
8	0
0	9
4	5
7	3
1	12
1	1
0	4
0	0
1	9
0	0
0	10
4	1
0	0
0	5
0	10
1	5
9	7
2	10
7	9
4	6
10	0
4	0
9
7
8
7
11
4
9
2
4
9
6
1
0

## Sheet: Part E
Wallace et al.
Microglia depletion disrupts normal functional development of adult-born neurons in the olfactory bulb
Figure 4-source data 1
Each row is the lifetime sparseness for one dendrite.
Control	PLX
0	0
0.385864	0.311551
0	0
0	0
0.262962	0.131885
0.169874	0
0.243258	0.0666667
0.4647	0
0	0
0	0
0.0666667	0
0.128614	0.73201
0.285305	0
0.0666667	0
0.299258	0
0.424721	0.4343
0.0666667	0.337836
0.245766	0
0.512629	0.0666667
0.444981	0
0.486785	0.572306
0	0.262928
0.506048	0.501556
0.23683	0.364373
0	0.20532
0.406905	0
0.448769	0
0	0.12888
0.42203	0.439566
0	0.132862
0	0
0	0.123422
0	0.185624
0	0
0.264364	0.133053
0	0.0666667
0	0.0666667
0.181419	0
0	0.198669
0.0666667	0.509651
0.0666667	0
0.252727	0
0.0666667	0
0	0
0	0
0.247301	0.0666667
0.0666667	0
0.133039	0.37862
0	0.296189
0.511638	0
0	0.0666667
0	0.234381
0	0.127265
0	0.0666667
0	0.467012
0	0.37363
0	0.373086
0.130022	0
0.194046	0
0	0.265197
0	0.216902
0.307854	0.305753
0	0.397101
0.291333	0.0666667
0	0.196889
0.26155	0.292964
0.132328	0
0.451382	0
0.0666667	0.305649
0.0666667	0.480599
0.380176	0.383138
0.124508	0.265196
0.333014	0.23847
0.186941	0.172648
0	0.286924
0	0.300954
0.379121	0
0.0666667	0.17713
0.306824	0.177806
0.193077	0.571008
0	0.273801
0	0
0	0
0	0
0.268085	0
0.0666667	0.0990444
0	0
0.181495	0
0.214617	0.0666667
0.0666667	0
0.194074	0.132192
0.480498	0
0	0.245306
0.203984	0
0.370372	0.0666667
0	0.132326
0	0.251341
0	0
0.0666667	0.537523
0.0666667	0.0666667
0.327629	0.524374
0	0.0666667
0	0.258764
0.255035	0.244217
0	0.0666667
0	0
0.435514	0.199818
0	0.193233
0.257636	0
0.280196	0.24916
0.309969	0.0666667
0.371439	0
0.1333	0.24866
0	0.0666667
0.420033	0.133129
0	0
0	0
0.182871	0.4769
0.0666667	0.0666667
0.449545	0.260856
0	0.354745
0	0
0.487098	0.0666667
0.129013	0.583703
0.48676	0
0.0666667	0
0	0.0666667
0	0
0.493769	0.379872
0	0
0.132865	0.382865
0	0.197884
0.388852	0
0.132344	0.193858
0	0
0	0.0666667
0.199006	0.246218
0.26305	0.189277
0	0.0666667
0.129276	0.245034
0.44452	0.193232
0	0.505562
0.132776	0
0	0.0666667
0.365383	0.28572
0.420519	0.0666667
0.0666667	0.190095
0.668186	0.116779
0	0.184996
0.0666667	0.235134
0.435228	0.580293
0	0
0	0.177751
0	0
0	0.256062
0	0
0.273871	0
0.487136	0
0.356839	0
0.302924	0.381268
0.347964	0
0	0
0.416443	0
0.432349	0
0	0.445382
0.240091	0.285247
0.42974	0.175406
0.0666667	0.651623
0.0666667	0.0666667
0	0.253111
0	0
0.0666667	0.413017
0	0
0	0.578656
0.199478	0.0666667
0	0
0	0.208449
0	0.603719
0.0666667	0.316715
0.502773	0.41645
0.131621	0.603521
0.431984	0.548767
0.261328	0.25773
0.564142	0
0.197784	0
0.490237
0.307832
0.475641
0.31156
0.606213
0.260531
0.575419
0.132362
0.247238
0.507766
0.393877
0.0666667
0
