# Supplementary material for: Microglial depletion disrupts normal functional development of adult-born neurons in the olfactory bulb
Source: eLife. 2020 Mar 9;9:e50531. doi: 10.7554/eLife.50531 (PMC7062469; doi:10.7554/eLife.50531)
Supplement: Figure 5—source data 1. [file elife-50531-fig5-data1.xlsx]

## Sheet: Part C
Wallace et al.
Microglia depletion disrupts normal functional development of adult-born neurons in the olfactory bulb
Figure 5-source data 1
Each row is the spine density for one dendrite.
Control	PLX
0.219077	0.298517
0.300379	0.292597
0.229946	0.418892
0.329436	0.425441
0.306234	0.717287
0.414845	0.449719
0.335994	0.485831
0.456973	0.383214
0.222997	0.15154
0.128748	0.211666
0.0968045	0.313402
0.619608	0.403259
0.244	0.646513
0.340157	0.472487
0.109936	0.655648
0.172728	0.379046
0.517426	0.325008

## Sheet: Part D
Wallace et al.
Microglia depletion disrupts normal functional development of adult-born neurons in the olfactory bulb
Figure 5-source data 1
Each row is one dendrite and each column is the spine head volume of each spine.
Control
1.63327	0.0343973	0.033505	0.154676	0.252237	0.0214826	0.014361	0.293003	0.0627016	2.2661	0.234435	0.177337	0.0388095	0.0287659	2.51803	0.0608163	0.0327621	0.269926	0.190137	0.101976	0.0521134
0.124239	0.503112	0.103613	0.276454	0.233641	0.340926	1.65672	0.0995293	0.120782	0.511555	0.22934	0.0889845	0.086564	0.0887349	0.0920584	0.20097	0.560329	0.425776	0.0469859	0.316909	0.474698	0.226048	1.16879	0.175298	0.0542209	0.370001	0.902296	0.00206447	2.13174	0.409397	0.0215846	1.54049	0.346072	0.867671	0.138427	0.987325	0.198001	0.608452	0.0762259	0.955949	0.0676742	0.277481	0.0313406	0.149336	0.122083	0.459308	0.0976132	0.543879	0.914813	0.460485
0.613051	0.0954127	0.0901579	0.195629	0.412701	0.112228	0.0768811	0.0998647	0.0703162	0.0899086	0.134146	0.432192	0.0563541	0.0976093	0.166124	0.160746	0.126054	0.0941219	0.106173	0.105804	0.0349151	0.119433	0.124336	0.061763	0.14934	0.0697425	1.16944	0.101513	0.042777	0.15535	0.031238	0.0473446	0.112592	0.121069	0.128253	0.132645	0.0688228	0.0448892	0.0273046	0.0492344	0.0561432	0.53681
0.569657	0.0236006	1.0139	0.108121	0.0105947	0.108786	0.0480172	1.54587	1.61578	0.653737	0.0525365	0.0547136	0.597271	0.115652	0.0550885	0.0372134	0.0255944	0.341241	0.0142998	0.0157946	0.322592	0.0743186	0.0184686	0.164612	2.01097	0.208704	0.0845344	0.0869241	0.0569302	0.0317513	0.106616	0.0854361	0.163069	0.100453	0.436826	0.0421941	0.11566	0.0868964	0.0518062	0.016105	0.21587	0.0390567	0.0668773	1.08048	2.68064	0.666217	0.176738	0.358849	0.173595	0.0740325
0.284491	0.46371	0.0337793	0.729053	0.0346415	0.319982	0.0231817	0.0625186	0.0214533	0.276981	0.0463583	0.265963	0.777926	0.31	0.0208655	1.05397	0.660799	0.0247675	0.0472264	0.0672901
0.0887649	0.949615	1.65411	1.05362	1.0796	2.24616	0.0681847	0.723914	0.643664	0.480278	0.464018	1.76925	1.06843	1.07994	0.0231965	1.09537	0.224723	1.12128	1.08317	0.0802213	0.0951227	0.660866	0.798773	0.203688	0.314704	0.960279	1.08358	0.803735	0.510625	0.688277	0.891057	0.0855287	0.750681	0.756463	0.264182	0.263346	1.80192	1.12298	0.672067	0.0519109	0.186315	0.0421563	0.0583623	0.307328	1.03502	0.511691	0.280124	0.897133	0.276867	0.100105
0.109168	0.0449646	0.0900704	0.131532	0.525897	0.103275	0.636399	0.0829994	0.827145	0.102169	2.19007	0.0483753	0.524902	0.0346193	0.0303715	0.0181338	1.12646	0.299378	0.0682128	0.0793394	0.0306919	0.104899	0.926236	0.389026	0.0207499	1.15749	2.3982	0.313601	0.0332801	0.0676491	0.0195729	0.025577	0.0403188
1.2535	1.4203	0.432721	0.442633	0.101161	0.147617	0.0808853	1.18901	0.519818	0.226003	0.216088	0.877181	0.536668	0.0486056	1.17728	0.760489	0.211993	0.330456	0.251308	0.132913	0.261839	2.61686	0.138334	0.338719	0.0790461	0.0171996	0.0250144	0.0688743	0.732697	0.108379	0.178396	0.738405	0.692422	0.0785943	0.0324678	1.62205	1.61394	0.605488	0.963302	0.12402	0.140448	0.182345	0.13915	1.10758	0.79209	0.159719	0.190022	0.186178	1.58929	0.136534
0.111477	0.0122999	0.137122	0.363748	0.088922	0.120056	0.0892701	2.41927	0.113197	0.240918	0.101317	0.0828544	0.331963	1.08661	0.0740952	0.0990642	0.0410796	0.0107158	1.17853	2.07778	1.30288	0.49065	0.147103	0.610707	2.8167	0.984061	0.186266	0.246079	2.11117	0.145614	0.0872783	0.126023	0.118989	0.147461	0.142185	0.0909142	1.18983	0.10449	0.0731861	0.172554	0.0389043	0.015809	0.148171	0.128072	0.193139	0.119925	0.13301	0.681433	0.0356074	0.0201864
0.493655	0.105474	0.134362	0.0971837	0.167013
0.227843	0.336642	1.33993	0.21685
0.0812754	0.0149451	0.0376788	0.151554	0.100982	0.251407	0.101473	0.0710604	0.0478935	0.0637432	0.052931	0.128865	0.141138	1.34394	0.0551568	0.624304	0.138277
0.226315	1.00945	1.23672	0.133793	0.692127	0.0848413	0.0285344	0.127941	0.903605	0.0237594	0.181094	0.0922672	0.113229	2.41813	0.0528253	0.102004	0.795824	0.0693522	0.0374443	0.267338	0.161946	0.217138	0.127557	0.28671
0.495539	0.027276	0.195335	1.24307	0.113918	0.592242	1.14747	0.200598	0.106693	0.0906959	0.513312	0.214535	0.510649	0.14765	0.310393	0.130474	0.886108	0.145049	0.0646565	0.482531	0.113091	0.430158	0.0721833	0.553932	1.03679	0.370069	0.132681	0.251204	0.106662	1.45295	0.0552293	0.0368253	0.195183	0.10826	0.0673819	0.218257	0.0277077	0.237221	1.20329	0.335736	0.0692146	0.00935992	0.0237991	0.564211	1.47131	0.0567891	0.194283	0.0128353	0.18478	0.332441
0.103213	0.0722103	0.0439737	0.670885	0.181291	0.105647	0.0741003	0.178504	1.45876	0.0277718	0.0644073	0.0885729	0.207922	1.14049	0.0989929	1.56412	0.947421	0.0841287	0.322165	2.58797	0.690989	0.292278	0.029618	0.0641358	0.0651273	0.0207322
0.171592	0.0999974	0.0496796	0.274261	0.137544	0.11138	0.10874	0.291687	0.316131	0.199365	0.116743	0.64656	0.302927	0.8636	0.0924741	0.587267	2.09434	0.124645	0.165022	0.0395854	1.06022	0.288565	1.18753	0.100304
0.0482216	0.0829357	0.15822	0.375442	0.687884	0.768117	1.07408	0.1499	0.683033	0.318013	0.768713	0.0340754	0.489438	0.08343	0.0983446	0.138828	0.0167948	0.978487	0.0270489	1.09082	0.0991336	0.0492686	0.0773694	0.12384	0.372723	1.06095	0.882106	1.04186	0.117995	0.0146585	0.0135221	0.0480846	0.566137	0.104039	0.0848785	0.0105271	0.0913625	0.167937	0.132037	0.620345	0.165908	0.0516819	0.06418	0.530193	0.670521	0.357636	0.0576237	0.130814	0.0423817	0.674844
PLX
0.341023	0.284712	0.190833	0.351151	0.495328	0.603191	0.113798	0.397253	0.114564	0.245963	0.286231	0.321187	0.643613	0.46209	0.223256	0.914086	0.0695231	1.23868	0.276477	0.308079	0.0973914	0.228818	1.01298	0.372998	0.153447	0.132085	0.429797	0.0535866	0.109415	0.0738854	1.40314	0.0210175	0.491769	0.222728	0.282795	0.369499	0.0960288	0.337086	0.213726	0.147389	0.0807488	0.0274268	0.338677	0.0436475	0.0431009	0.122902	0.153836	0.25359	0.329255	0.302106
0.489915	0.189465	1.26113	0.0246648	0.0880663	0.139189	1.0985	0.106039	0.678774	0.0147365	0.377815	0.303884	0.194014	0.0789499	0.780219	0.732044	0.561793	0.340753	0.0235055	1.02961	0.116321	0.100847	0.57166	0.437054	0.0262852	0.0261695	0.872001	0.023155	0.0271078	0.0957873	0.588804	1.49022	0.0410108	0.188154	0.014953	1.62207	1.44341	2.43915	1.01142	0.881231	0.982672	0.157461	0.202498	0.0594477	0.0283026	0.506926	1.4453	0.629951	2.7887	0.925363
0.993441	0.314647	0.827725	0.84021	0.233768	0.90147	0.184423	0.189797	0.404584	0.0248862	0.172636	0.103846	0.29719	1.11653	0.122595	0.133832	0.126272	0.076185	0.146232	0.535164	0.531353	0.0583352	0.369637	0.902309	0.0732132	0.236059	0.848283	0.419269	0.936574	0.826384	0.0265449	0.811087	0.219456	0.220459	0.525738	0.0767126	0.223452	0.11839	0.200307	0.0992701	1.45107	0.118506	0.035475	1.1391	0.068387	0.748505	0.0338651	0.525456	0.0437423	0.185654
1.07354	0.338909	0.0793774	0.0404893	0.110205	0.373956	0.227236	0.143511	0.108129	0.522178	0.0380223	0.194686	1.0132	0.239463	0.121389	0.784246	0.173857	0.0825349	0.150289	0.0535837	0.776078	0.115171	0.277797	0.0249873	0.201916
0.6948	0.500897	0.385254	1.23845	0.305066	0.347983	0.289291	1.08827	0.382044	0.37307	0.145726	0.599192	1.43915	0.433523	0.2433	0.710112	0.541834	0.551082	0.0546447	1.95611	0.613996	0.805576	0.152117	0.221129	0.235207	0.112493	0.996555	0.253288	0.549865	0.413669	0.65652	0.0964911	0.0953334	0.450656	0.742734	0.0205942	0.253436	0.180948	0.11066	0.474879	0.00206447	0.21385	1.24825	0.322505	0.03374	0.967357	0.214876	0.128333	1.68383	0.676594
0.316544	0.361169	0.136958	0.121642	0.21995	0.374299	0.0980844	0.0630108	1.20136	0.0615878	0.00206447	0.0650044	0.86952	0.115648	0.0390061	0.0805202	0.406564	0.409167	0.613842	0.338031	0.220153	0.152579	0.379745	0.838421	0.186564	0.115369	0.177098	1.0006	0.709546	0.567057	0.313976	0.129163	0.297609	0.0283282	0.212274	0.840674	0.011854	0.845496	0.183865	0.0500575	1.53708	0.0108096	0.198146	1.30618	0.125024	0.754354	0.081736	0.0469843	0.072916	0.64321
0.172796	0.774302	0.121263	0.087243	0.974163	0.22464	0.238875	0.395199	2.34801	0.0683594	0.398206	0.183138	0.0291928	0.024862	0.378582	0.127018	0.159912	0.206264	0.17948	0.170723	0.0212692	0.910491	0.0767339	0.15273	0.241229	0.0868864	0.553952	0.0154251	0.0248678	0.0872802	0.100165	0.264472	0.055078	0.4491	0.115356	0.0670933	0.0444791	0.800826	0.520064	0.188978	0.026711	0.0509606	0.546519	0.131277	0.0464749	1.61287	0.0151685	0.248346	1.03349	0.351646
0.123063	0.476585	0.208514	0.665685	0.582788	0.0766569	0.819482	0.622917	0.408206	0.418715	0.0120548	0.0787672	1.12051	0.0292044	0.480034	0.310492	0.0890657	0.126044	0.220662	1.03054	0.0267035	0.327026	0.19854	0.0577184	0.419247	0.146315	0.334671	0.136241	0.17403	0.278504	0.483885	0.0182908	0.0564548	0.133776	0.0910682	0.0842144	0.561597	0.196697	0.889031	0.256073	0.0962556	0.116861	0.218115	0.011041	0.212165	0.0351243	0.168785	0.251028	0.0598602	0.313037
0.664402	0.0920048	0.85235	1.87108	0.794279	0.711633	0.549979	0.34333	1.01725	0.551945	0.0394502	1.18358	0.0345419	0.100996	0.333431	0.222494	0.560448	0.233939	0.187915	0.265036	0.0356683	0.21165	0.0650566	0.411232	0.193212	0.136757	1.05934	0.5246	0.53817	0.0874761	0.205016
0.068789	0.0222792	0.203889	0.0527683	0.425297	0.498289	0.12886	0.713852	0.270557	0.329462	0.0577906	0.893218	0.0177037	0.0673094	0.364601	0.61673	0.0555213	0.115733	1.11049	0.203891	0.123393	0.882788	0.112895	0.0229031	0.112258	0.031707	0.0279027	0.563479	0.0547068	0.342404	0.113893	0.168504	0.0473163	0.00476618	0.560775	1.1427	0.72336	0.0667763	0.851532	0.246891	0.0270706	0.091385	0.158992	0.329109	0.0785473	0.167022	0.0814902	0.204612	0.152571	0.228416
0.297862	0.467714	0.17174	0.022654	0.705968	0.104205	0.252897	0.579274	0.637195	1.11093	0.419405	0.383582	0.484642	0.589076	1.36144	0.0495105	0.0816372	0.0989369	0.294442	0.0205426	0.0571687	1.06239	0.41802	0.668524	0.239571	0.0811213	0.400335	0.530264	0.0287985	0.0277524	0.0901134	0.0671603	0.0147708	0.0343248	0.467658	0.147967	0.576139	0.209614	0.022755	0.731473	0.0295239	0.117837	0.172908	0.0310794	0.0216661	0.0471176	1.50869	0.023048	0.415492	0.0912949
0.142192	0.17131	0.286607	0.785115	0.0227397	0.175501	0.106266	0.0908957	0.130068	0.2214	0.0917405	0.138345	0.0827662	0.0624862	0.149674	0.248787	0.240733	0.0632877	0.295663	0.0284376	0.0744951	0.497661	0.250437	0.109268	0.0392607	0.0851933	0.0545883	0.340255	0.0420438	0.0535717	0.124322	0.379649	0.246061	0.0357793	0.0607125	0.0788574	0.0810148	0.108704	0.0750194	0.0662592	0.154172	0.135707	0.139286	0.518448	0.737161	0.0464387	0.0410423	0.205985	0.00733282	0.0224186
0.495802	0.27605	0.0712149	0.298699	0.09419	0.0783808	0.455149	1.08569	0.140734	0.241301	0.0582825	0.0393066	0.169861	0.810942	0.128701	1.14389	0.0837245	1.03555	0.137816	0.11362	0.637909	0.462556	0.164591	0.724698	0.204162	0.175285	0.25439	0.190445	0.416414	0.362693	0.143814	0.0287602	0.118043	0.476722	0.010492	0.264536	0.0568067	0.771264	0.22351	0.0616754	0.768755	0.0164195	0.558228	0.0277538	0.1215	0.15662	0.417669	0.510376	0.560639	0.273828
0.200207	0.0376316	0.356423	0.554413	0.0388016	0.242772	1.05918	1.33916	0.114082	0.424549	0.166997	0.222816	0.0531286	0.0702533	0.213037	0.0366039	0.540075	0.021654	0.67877	0.102193	0.12373	0.166304	0.202408	0.0473289	0.117435	0.11038	0.472299	0.459817	0.0633865	0.442441	0.650272	0.523958	0.258628	0.114336	0.135877	0.135497	0.0815799	0.169863	0.1278	0.300847	0.18199	0.589278	0.0204836	0.0147155	0.0980505	0.330936	0.0249758	0.130862	0.113143	0.242605
0.479035	0.342914	0.200337	0.136074	0.0551064	0.156017	0.0139757	0.193488	0.27122	0.148731	0.20502	0.0876305	0.280423	0.296509	0.0968359	0.0794826	0.0595049	0.197693	0.149393	0.145462	0.153915	0.203397	0.130741	0.0478031	0.121561	0.0336282	0.116427	0.234185	0.314508	0.078155	0.213674	0.414376	0.443873	0.12148	0.16206	0.110768	0.0661135	0.0857775	0.0885008	0.10601	0.0691756	0.13761	0.172616	0.48638	0.127409	0.275519	0.644179	0.165337	0.239339	0.117082
0.168764	0.152545	0.73072	0.983518	0.0306537	0.114228	0.0501586	0.0646509	0.227741	0.976135	0.789496	0.122754	0.0608259	0.121255	0.152457	0.123839	0.0259989	0.13113	0.0618039	0.121225	0.142374	0.0588794	0.0864631	0.294031	0.436401	0.0608664	0.0889802	0.375965	0.214189	0.110192	0.12408	0.321148	0.114148	0.167824	0.174203	0.102865	0.0736473	0.0702982	0.631788	0.284653	0.182592	0.852942	0.0712937	0.0683869	0.123142	0.172328	0.182922	0.358401	0.118781	0.0364468
0.0739436	0.210896	0.0968864	0.144356	0.494302	0.395952	0.0951232	0.0645738	1.016	0.269123	0.131639	0.287815	0.199246	0.132867	0.416638	0.0841697	0.111009	0.282962	0.228802	0.228013	0.372427	0.180884	0.113537	0.362985	0.647841	0.101575	0.0505699	0.337928	0.0230897	0.109597	0.0800824	0.0100938	0.160539	0.0760849	0.0649132	0.112977	0.173539	0.190247	0.123414	0.113551	0.222191	0.254423	0.158211	1.60182	0.827578	0.132346	0.19433	0.0577554
[truncated: 166 more columns]
