# Supplementary material for: Microglial depletion disrupts normal functional development of adult-born neurons in the olfactory bulb
Source: eLife. 2020 Mar 9;9:e50531. doi: 10.7554/eLife.50531 (PMC7062469; doi:10.7554/eLife.50531)
Supplement: Figure 6—source data 1. [file elife-50531-fig6-data1.xlsx]

## Sheet: Part C
Wallace et al.
Microglia depletion disrupts normal functional development of adult-born neurons in the olfactory bulb
Figure 6-source data 1
Each row is one dendrite and each column is the frequency of each sEPSC.
Control
0.94679	1.178	1.21758	0.879585	1.3587	0.820883	0.43554	11.4811	0.552242	1.06101	1.33333	1.86741	0.64487	1.3369	3.87147	1.73671	0.524879	6.74764	1.81324	0.941442	0.215281	0.476622	1.36073	7.57576	2.13721	1.63026	1.17911	0.52173	0.335087	0.891504	1.86602	6.64452	4.63607	25.1256	24.2718	3.33667	2.85714	169.492	0.825491	1.16225	12.3762	15.015	0.521458	0.623791	0.516396	1.87371	3.47102	18.2149	1.54107	0.712352
8.58369	333.333	13.6054	3.81825	66.2252	32.1543	7.27273	11.6959	40.3226	7.1736	2.94377	2.05719	238.095	14.3062	11.9904	3.09215	8.38926	17.9211	256.41	26.738	5.44959	3.22789	28.6533	8.30565	9.74659	7.61035	5.10986	26.178	10.2041	5.0025	35.461	10.0806	8.1367	5.16262	8.24402	3.96511	8.92061	7.44048	26.6667	13.3511	8.76424	9.09091	21.4133	192.308	3.16256	11.325	4.49843	6.27746	10.989	5.48847
4.83092	26.0417	15.3139	222.222	10.101	101.01	6.7981	10.3842	263.158	7.24638	18.7266	23.9808	2.47463	40.9836	19.7239	6.49351	3.98406	10.0301	14.0647	3.16556	11.3895	294.118	9.46074	333.333	35.0877	26.3158	14.1844	16.7785	2.56213	33.8983	40.9836	22.6757	30.581	49.7512	25.3807	22.8833	21.097	7.91766	67.5676	26.8097	30.3951	23.753	208.333	19.8807	19.084	196.078	19.8413	7.61615	30.303	140.845
2.98507	1.01958	0.606502	1.01874	4.79386	23.753	55.5556	13.6799	11.4025	34.2466	7.81861	28.49	2.73523	6.91085	91.7431	13.4953	15.625	23.2019	2.31803	4.14422	208.333	0.753125	0.243055	0.860585	1.70999	2.68889	2.57732	0.905633	0.937998	0.741785	2.57334	28.9855	26.8097	2.83447	37.037	23.31	0.345197	0.765345	0.280073	0.54936	1.82582	1.39334	0.839631	9.70874	5.8548	1.02375	3.10945	3.71609	38.3142	95.2381
0.517143	2.40327	6.25	1.16144	0.508285	0.285976	12.4224	9.7371	11.0132	12.2399	17.2414	48.7805	27.1739	23.0415	24.4499	16.4745	20.8333	20.3666	333.333	25.5102	16.2602	28.9017	23.2558	20.0803	13.4228	4.3956	27.3973	2.98686	13.8504	4.83325	3.7092	8.20345	0.582751	5.78035	0.622781	7.69823	5.73066	22.9885	178.571	14.5773	67.1141	13.3156	11.6144	10.7527	11.9048	263.158	51.2821	34.2466	15.2672	5.35619
5.2687	256.41	0.965251	0.601757	13.7552	25.3807	13.2275	1.1909	21.3675	4.34216	5.77701	312.5	7.64526	34.965	2.26912	27.1739	232.558	31.1526	217.391	2.56674	9.74659	2.70929	2.82247	1.88501	31.1526	151.515	16	36.7647	46.729	277.778	125	81.9672	18.9394	71.9424	40.3226	40.3226	11.8483	243.902	32.0513	20.1613	256.41	8.60585	15.5039	6.56599	31.6456	54.0541	34.3643	2.42248	5.67537	3.07598
22.5734	7.07714	98.0392	16.0514	44.4444	11.3507	256.41	84.0336	19.4932	13.947	12.7065	36.7647	3.99361	37.7358	26.3852	14.7275	27.6243	2.95683	52.0833	22.0751	30.1205	2.04625	14.6199	58.4795	4.96771	23.1481	18.3824	26.5252	14.2653	2.93858	10.0806	112.36	13.6986	2.79799	18.4843	10.3199	14.6843	3.15856	6.7981	25.1889	123.457	23.2558	6.25782	15.9744	12.21	10.5152	147.059	8.24402	7.01754	12.9702
1.85598	0.838785	3.68324	10.9649	2.49377	1.0866	0.484496	1.22549	277.778	1.0812	23.0415	2.53036	4.41696	0.799936	6.4433	2.34467	5.10204	0.570939	5.95948	1.15701	0.72015	0.416875	3.1746	10.7296	1.06293	2.4888	0.604412	0.647082	0.622239	0.86423	1.7319	1.63079	322.581	4.98504	1.72891	1.5706	8.34028	0.425152	2.65182	0.31411	6.15006	1.16279	2.23414	0.266716	0.416493	192.308	5.73394	1.42531	9.25926	1.76929
1.97161	0.234858	0.295928	0.403714	0.125548	5.64653	1.38026	0.249969	0.448692	15.083	4.4843	17.2712	0.670736	0.540453	0.325045	0.125342	0.200092	263.158	0.316036	3.11915	0.311391	0.384704	0.724638	2.51383	0.336791	0.379838	0.547315	0.386369	5.29942	0.19289	0.0737305	5.13084	1.16986	2.0008	0.978186	1.64908	0.215633	1.09266	0.177813	5.10465	1.10656	3.92927	5.91716	0.597229	0.725426	0.689941	0.643087	0.0950751	0.647207	0.337735
1.38581	10.2881	5.57724	22.4215	6.36537	8.21018	34.7222	2.81849	28.7356	11.7925	7.57576	14.3885	47.8469	123.457	39.6825	30.3951	17.4825	28.6533	10.846	17.5747	21.645	26.738	181.818	5.91366	1.80343	4.17537	90.9091	0.881912	30.8642	0.953743	50	322.581	9.80392	3.12012	4.07166	14.43	8.41043	222.222	40	9.57854	12.7714	4.22833	15.9744	4.12541	175.439	13.7174	1.86047	2.73075	7.68049	8.70322
3.55114	16.0256	28.0112	19.1571	208.333	3.31345	15.6006	6.06061	6.09385	12.9032	7.33676	70.922	22.8311	68.9655	17.8253	37.4532	16.8634	67.5676	169.492	18.4162	47.619	15.3846	6.32111	181.818	8.05802	7.98085	6.8918	91.7431	5.81395	72.4638	5.02765	18.1818	9.43396	2.26244	3.64431	200	8.98473	13.947	2.36518	3.95257	15.1515	45.6621	5.43183	21.8818	4.69925	3.20718	7.33676	18.9753	37.8788	9.02527
3.9604	0.743163	58.4795	3.38983	22.9885	208.333	3.28084	1.89861	0.629683	2.78396	3.48554	2.15054	2.04792	0.713063	15.5763	29.4118	322.581	17.8891	9.34579	1.19574	1.53116	0.989805	2.67308	0.93932	1.2216	263.158	2.73973	14.1844	29.4118	3.76223	3.33111	12.0482	1.06045	3.81679	2.20361	4.36872	5.10204	3.89712	175.439	1.51653	5.81395	3.26691	1.51035	277.778	2.17202	1.16577	2.78396	1.06849	1.16117	6.34921
1.22504	3.89257	4.03551	0.310926	14.1044	2.36016	0.339524	1.84536	2.57865	2.22568	1.85185	3.07503	1.72384	222.222	1.75654	2.01491	1.53704	1.43308	0.555309	2.70636	14.0056	156.25	3.90472	8.41751	11.2613	0.6035	3.0581	5.90667	1.28222	0.869414	4.31965	0.449277	1.12271	161.29	0.491521	1.26887	22.6244	18.8324	3.44828	0.785484	0.238738	2.6469	0.623441	1.06621	1.90186	0.760456	1.9861	6.80272	1.04384	149.254
2.25276	4.97265	2.64131	0.822978	13.4409	312.5	9.35454	263.158	11.6414	1.78476	126.582	4.48229	4.49843	0.754888	1.66417	5.64016	3.41064	11.0132	3.76364	4.98753	303.03	1.96618	1.78731	17.7305	0.519265	7.4129	1.79051	0.94304	1.81258	11.2994	3.56506	1.69176	1.56104	9.38086	12.8205	5.7241	1.07481	27.248	11.0988	2.58264	2.72257	12.1951	0.905141	4.19287	3.0525	9.57854	0.615498	4.74383	2.1901	5.75374
14.7929	14.9254	263.158	15.748	8.01282	27.7008	8.1367	25	13.5318	31.1526	4.39367	21.3675	25.641	333.333	12.5156	5.91716	107.527	169.492	31.348	15.949	12.8205	13.1579	32.7869	6.80272	12.4224	6.40205	3.46861	200	4.5106	28.5714	16.8919	212.766	9.31966	6.10128	14.0845	40.4858	15.361	7.74593	263.158	10.1112	18.5529	27.1739	26.1097	181.818	14.3678	7.32601	23.8095	10.3093	8.92857	7.73395
1.07782	4.22833	0.858295	0.493024	1.42959	0.192663	1.36575	4.05022	5.25486	7.5643	135.135	7.75795	107.527	8.84173	4.86145	5.95593	4.1511	59.1716	3.9032	6.48088	13.8696	1.40017	0.335199	14.881	8.7184	0.358166	5.69476	0.617513	4.31779	1.2773	0.472389	0.316867	0.348129	0.251617	13.5685	7.47943	5.73394	11.2486	0.632151	3.6483	2.46427	3.5461	5.16262	10.2249	5.68182	18.1488	98.0392	2.25581	32.6797	0.227723
15.674	169.492	13.6799	11.1732	27.5482	5.40249	1.70765	2.35128	7.15308	1.9084	12.8866	24.6305	29.8507	16.5017	12.21	15.5039	65.3595	11.7647	2.74801	2.10482	33.67	2.46124	1.60539	0.83949	14.8368	33.8983	7.44048	3.73972	9.8912	1.65893	4.42087	2.28154	3.53482	28.0112	232.558	8.02568	9.57854	2.06911	5.98802	1.29853	16.0772	1.87441	1.21788	13.2802	7.3046	1.22534	217.391	2.11193	10.2459	4.78927
7.12758	2.22767	4.59982	30.8642	8.92061	2.849	16.7785	12.3762	2.91206	2.06484	19.802	270.27	322.581	7.0373	8.05802	1.38677	192.308	2.20848	8.99281	2.94464	4.45038	129.87	4.19287	7.81861	8.55432	5.87889	322.581	8.8968	3.82263	1.12575	6.68896	2.77239	2.09118	104.167	18.9753	18.9394	3.87297	5.25486	7.4184	36.3636	4.04531	7.46269	1.46821	4.20168	1.97316	2.41663	2.01613	4.28816	4.08664	11.6686
4.09333	2.34467	1.68039	18.7617	15.1286	98.0392	9.93049	5.30504	7.24113	4.23908	4.48029	21.097	2.82646	7.25163	76.3359	0.73616	3.92619	1.19403	1.19318	0.568893	2.4919	3.61402	16	2.7137	22.6757	6.54022	19.4175	204.082	11.6279	13.9665	23.0415	6.32511	18.7617	6.59196	2.51319	3.3456	3.61533	18.8324	22.4719	9.12409	8.97666	53.7634	14.1443	15.6986	8.92857	6.87758	6.16903	16.9779	7.29395	21.5517
5.67537	10.3842	5.28262	9.81354	270.27	0.98668	10.5597	188.679	3.41997	14.6628	6.11995	13.0208	4.32152	303.03	4.55789	30.9598	11.8765	10.1112	3.24886	4.97018	22.1239	3.93082	3.93546	3.03767	3.29924	4.49438	22.0751	10.4822	14.2045	2.91206	4.06669	9.09918	9.18274	9.54198	3.18674	3.18573	4.98504	6.8306	23.4742	5.76037	3.98565	227.273	1.37155	10.6496	1.20963	20.1613	27.027	322.581	18.0832	5.25762
18.622	1.08755	1.44718	166.667	27.3224	8.70322	1.72265	0.865351	3.61925	1.97628	263.158	21.0526	2.25734	1.73732	3.22685	1.61031	1.30073	1.84945	1.89897	294.118	2.36463	5.5991	0.716589	3.32005	1.66694	3.84172	1.4881	2.88517	7.21501	4.32339	2.23714	1.11595	270.27	1.31079	5.24659	1.14784	66.6667	0.61282	3.34896	0.981643	1.14273	1.66583	1.44823	2.74348	2.57003	3.28731	0.856971	1.40687	322.581	1.02554
0.282151	128.205	0.224306	0.416389	0.276778	2.31054	19.6464	238.095	0.146254	2.05339	0.720773	0.0992467	0.35859	0.116209	0.0842808	0.223085	2.14041	0.192082	1.04965	1.11582	0.277308	0.224356	0.197761	0.892698	0.558005	0.175716	1.03434	0.215499	1.55594	0.196556	0.623169	0.612933	0.491328	0.882068	0.869868	0.30773	0.147905	0.292937	0.643956	0.0351157	0.662515	0.135955	2.65252	0.853097	2.84819	0.515172	0.149939	3.37496	185.185	1.04646
30.6748	25.8398	24.0385	10.5485	13.4228	14.9477	14.0449	22.779	28.3286	12.4533	24.0964	13.1234	100	10.1937	11.3507	50.2513	30.8642	200	277.778	35.9712	294.118	29.7619	15.5763	200	18.9036	9.43396	12.7877	98.0392	32.1543	10.0806	66.6667	15.4321	70.922	59.1716	22.2717	23.6407	48.3092	322.581	13.0719	34.8432	16.8067	40.1606	15.1057	13.7552	19.1939	25.4453	14.3266	23.2019	16.1031	34.6021
4.06339	2.34467	2.6688	3.24149	2.85796	1.7507	3.49162	312.5	2.03128	5.36193	6.60066	27.3973	5.05051	11.0254	270.27	10.4822	5.18672	22.2222	3.98883	1.09769	2.26501	25.5754	3.0175	7.25163	15.7729	60.9756	6.54879	13.8696	75.7576	1.73883	2.76702	5.21376	13.1752	20.6186	5.58036	6.87285	42.3729	32.1543	158.73	7.97448	14.556	181.818	322.581	22.3214	20.8768	27.7778	6.92521	181.818	17.4825	7.08215
5.35332	3.65898	3.51989	3.45901	2.95334	263.158	2.71518	4.42674	2.79642	1.79276	227.273	10.8578	1.27421	2.12993	3.24254	8.46024	2.83206	2.52972	4.26076	14.5138	0.54615	1.25141	0.768403	2.35571	27.3973	1.28057	18.315	1.15741	227.273	1.34753	1.28535	263.158	0.745712	4.73709	9.53289	1.85563	16.0256	0.546837	1.55063	4.15628	2.12134	2.07039	6.36943	7.79423	14.0056	23.8095	10.4712	16.4474	5.49451	4.46828
0.0553691	3.07409	2.34302	2.4919	3.34336	3.70096	0.150718	0.0405467	1.38696	0.065392	0.0435013	0.0315423	0.75466	0.0924855	0.274296	250	0.857559	5.31915	0.171857	0.317551	0.0971232	0.234626	0.674627	0.158391	0.323876	0.837802	0.352038	0.537721	0.191344	147.059	0.185426	0.591891	0.45635	0.358757	0.449458	0.283744	0.115817	0.161734	0.748503	0.121355	0.136547	0.486334	0.168313	0.425134	0.387132	3.01659	0.713165	1.29534	0.180518	0.578637
3.92773	0.92115	5.87544	0.761499	5.0226	2.3015	2.89855	0.87604	10.3199	0.73014	0.731154	1.60154	0.995124	4.46828	2.67523	1.27992	0.651339	3.86399	0.412848	0.60794	1.03455	0.521485	0.913492	6.29327	4.79386	0.564844	1.67757	1.52022	2.68097	3.20205	4.40529	2.96209	9.27644	2.40211	1.15154	25.0627	0.737354	7.73994	6.40205	18.0505	3.33444	1.11757	7.4129	7.33676	3.96668	1.35208	119.048	0.794407	1.44634	2.53678
1.00543	0.907935	1.09182	322.581	0.918274	0.945626	6.10501	0.356443	2.19732	322.581	0.730887	2.9129	5.81395	4.19639	21.0084	10.8696	5.60538	1.10302	2.27273	1.755	3.6483	217.391	4.79386	8.65801	0.783392	4.58926	0.409987	1.68265	3.10655	1.11657	1.26215	3.38409	4.15282	0.68451	2.96648	0.578402	0.399281	1.89645	1.58957	0.512426	3.03582	1.48148	3.20307	285.714	0.66072	3.0003	0.508053	2.90951	5.75374	7.22022
3.34225	16.835	1.76616	10.8225	20.5761	1.2837	0.488234	7.07214	9.7561	11.5207	7.69823	0.376152	8.19672	0.716949	200	4.68823	8.96057	3.47705	5.84795	14.9925	108.696	13.4048	7.88644	200	5.29381	11.5207	4.67946	7.22543	7.57002	15.6495	20.4499	8.2713	5.32481	12.2549	14.1044	2.31214	2.41429	227.273	0.313637	1.6835	3.70782	2.66241	7.73395	312.5	30.1205	1.7298	0.48895	17.1233	13.6612	5.87544
1.972	11.6279	0.464684	243.902	0.818599	19.6078	10.8932	0.188733	1.28107	0.418375	20.1207	1.30702	0.557227	28.7356	163.934	1.81521	0.677645	227.273	7.47384	1.50852	0.240993	0.944822	5.21105	0.856531	5.20021	0.424286	0.671321	227.273	1.56421	0.982318	144.928	3.74813	2.86533	15.1057	2.26552	3.61141	0.771367	6.04961	4.37063	1.17192	0.551238	3.3389	3.85208	1.71233	33.8983	3.82848	0.644496	0.8285	0.954381	1.61708
PLX
4.47027	19.1939	5.74383	1.34807	11.1111	4.48029	4.65549	8.54701	263.158	5.83431	11.9904	2.48694	11.6414	11.2613	8.74891	9.12409	9.25926	5.22739	7.94913	20.0803	17.2117	17.7305	277.778	3.25733	2.30787	4.67727	19.2308	28.4091	3.98248	4.14594	26.2467	3.11624	1.90078	3.13676	6.90131	17.6678	2.82805	4.19815	322.581	0.832501	6.77966	1.63345	9.32836	3.44353	4.57247	1.1241	25.641	13.1234	4.0032	14.3062
7.29927	3.94166	2.88517	1.22324	1.20395	4.17188	4.87805	0.881601	0.963577	2.29938	0.785916	2.46609	1.59744	5.05051	3.32779	0.846453	7.45156	12.5313	6.77048	25.974	0.651551	1.31027	1.11944	1.92456	4.94805	1.38966	2.63227	8.19672	3.82117	11.2108	2.49688	10.929	1.9988	1.56226	14.0845	1.66085	5.7241	0.638366	1.93536	2.29516	1.16863	0.526094	2.13858	2.4108	6.09385	7.6864	5.52486	3.36927	8.65801	0.627235
3.50263	24.6914	0.941442	0.715615	1.90331	2.44918	37.1747	277.778	0.711187	0.493364	0.664938	0.130762	1.03584	3.75516	20.6186	9.7371	2.936	2.57931	10.9529	29.1545	88.4956	2.0016	1.29166	2.42014	5.26316	4.75285	11.9474	5.47345	4.56204	21.0084	4.4843	1.89753	3.87147	1.05731	24.0385	6.45995	6.06428	14.9701	0.114309	0.128184	0.337849	1.02849	4.08831	1.58831	1.49745	2.55689	0.862143	2.4266	0.0973814	11.6279
16.0514	8.07754	78.7402	23.5849	15.3139	19.7239	3.88048	7.15308	12.7065	10.4167	15.4083	17.5439	3.59842	43.4783	4.03877	3.99361	9.51475	6.15385	10.1215	5.62746	11.7925	19.1571	31.6456	15.7729	8.3682	48.0769	3.97772	11.3507	4.60405	44.2478	6.53595	263.158	9.8912	6.26959	8.88099	22.8311	9.19963	22.9358	10.2354	33.4448	8.23723	9.51475	33.4448	5.84112	27.8552	9.19963	312.5	14.2248	3.25309	3.46861
30.303	28.6533	29.8507	99.0099	30.9598	8.20345	3.46981	29.4985	24.1546	5.61167	50.2513	144.928	29.6736	24.9377	11.1235	8.62069	6.17665	38.7597	17.1233	62.1118	23.753	263.158	37.8788	25.5102	21.8818	12.6422	35.0877	86.9565	61.7284	86.9565	14.3472	30.581	35.5872	109.89	42.1941	60.241	40.9836	24.57	58.8235	26.3158	30.303	47.619	17.2414	63.6943	23.8663	45.045	45.4545	44.0529	33.67	25.7069
6.01685	5.98086	11.6686	15.674	31.746	15.625	20.8333	131.579	19.3798	10.1215	5.68505	13.3511	6.29723	8.48176	8.74126	19.8413	208.333	5.74053	7.25163	21.4592	10.6724	18.2482	39.2157	10.2249	15.5521	243.902	16.0514	24.5098	4.28082	41.1523	294.118	13.0039	19.0476	11.7233	181.818	12.0773	13.4771	4.47828	7.54717	4.21763	11.6414	8.18331	4.11862	7.7101	28.49	9.78474	1.65153	6.54879	4.58926	3.02024
0.610575	31.25	3.51989	3.14762	63.2911	1.52509	2.95596	3.76081	26.8097	1.99283	1.20584	9.30233	18.8679	3.05064	23.8095	2.61438	0.720773	5.72738	3.33778	0.844096	1.2161	6.19195	1.12296	1.77148	2.75558	12.837	1.0005	3.27332	1.41703	5.40833	26.0417	3.56506	0.559034	2.30362	4.29	1.23381	11.7647	4.10678	19.4553	1.21714	149.254	9.5511	2.98686	3.10078	2.73299	1.02923	1.65536	1.10278	16.1031	0.691754
0.693145	3.4662	0.984931	0.58827	0.148958	0.318532	0.146748	0.307531	0.357207	0.237801	0.0831221	0.451692	0.807363	0.678012	3.0003	18.0505	0.947508	250	0.277878	0.316036	0.35624	1.23457	0.161355	232.558	0.0972432	0.981162	0.25705	1.91168	0.434235	0.353369	1.49477	0.533248	0.72759	1.98295	1.33174	0.330196	0.455104	0.191439	2.70124	0.9081	0.274771	0.391865	0.415921	0.324149	142.857	0.256154	9.80392	1.2222	3.14762	0.314041
47.8469	9.31966	22.0264	243.902	14.4928	238.095	10.6496	5.8548	24.6305	25.974	18.1488	11.8765	10.3627	4.80538	31.9489	7.29395	200	12.0773	21.645	39.0625	16.4204	14.9254	10.5932	12.837	11.7509	212.766	15.6495	4.22833	2.25989	8.09061	12.1951	8.45309	15.361	322.581	2.55037	8.88099	30.4878	6.68003	8.95255	5.72738	27.7008	23.1481	19.5695	15.4799	29.0698	7.0373	5.20833	31.6456	84.0336	20.6612
0.369508	17.0358	30.303	11.5741	13.245	1.57679	0.32144	0.86881	12.8041	11.9048	250	17.4825	10.4167	10.5263	3.44471	20.6612	3.20616	6.75219	17.9211	19.1571	16.7785	2.21386	32.6797	0.638162	7.77001	2.65182	7.25163	1.92938	2.65745	5.70125	3.65497	12.3153	3.92773	123.457	2.96121	29.4985	7.22543	2.58665	14.9477	14.7275	1.26582	1.83688	19.802	1.95503	263.158	3.41763	30.1205	0.892937	1.20758	1.02902
0.850412	0.139256	0.207758	1.4453	0.913492	0.612895	0.26703	0.264159	0.173916	1.40865	0.817996	0.258906	7.0373	0.150643	0.220352	1.16659	0.286623	0.457813	0.202836	2.12675	0.748559	2.76396	0.161825	2.23414	0.585035	0.259767	0.106977	0.112299	0.312969	0.472836	0.0909678	0.571135	0.786411	0.258685	0.133349	0.287464	0.0686629	4.21941	0.396369	2.3855	0.693866	250	0.161132	0.666711	0.594884	0.967773	2.08986	0.0943779	0.0925112	0.861252
2.55558	200	2.49563	2.39177	5.05817	175.439	1.79115	1.7671	1.27486	35.5872	2.03046	0.72722	7.34754	1.21788	31.9489	5.74053	3.15756	3.4626	4.21763	113.636	1.46135	3.93856	3.46861	1.81324	27.5482	2.00924	10.6383	2.38379	200	0.568731	0.485696	3.12598	161.29	2.73	12.2699	0.610314	21.2314	250	33.67	3.54862	3.97141	7.47384	0.907029	32.6797	10.5932	14.6628	18.6567	4.58505	4.5045	27.1739
6.23053	10.2249	13.7931	7.14796	13.3333	23.9234	2.3546	9.76563	4.24088	15.6006	9.27644	6.92521	303.03	21.2766	24.2131	6.72495	2.93513	81.3008	14.7059	14.5349	3.91696	2.63366	39.3701	2.12179	4.05351	8.70322	7.86164	12.7551	15.8479	9.5511	8.73362	4.11015	98.0392	2.46609	5.89971	5.99161	27.1739	18.797	16.3934	10.7411	75.7576	9.46074	23.9234	5.38793	8.44595	1.86359	14.8368	5.88235	12.0773	29.4118
0.864006	1.98373	0.612858	1.17578	0.380503	263.158	1.21448	2.13356	2.12134	7.18907	8.17661	3.27976	1.76554	16.0256	2.20313	1.27113	0.483863	0.287051	3.54108	0.80952	10.3413	0.575705	5.40249	4.10509	3.13578	49.0196	2.53678	0.457896	1.1685	0.90082	10	7.72798	8.29187	2.09644	0.528653	1.75009	0.794029	0.548576	4.39754	16.129	2.34797	12.2699	1.19503	2.14546	2.70197	0.917095	9.31966	2.28624	1.3421	1.78221
6.34518	14.8368	263.158	24.5098	2.39063	3.36247	6.64011	1.9459	1.07227	2.50941	4.52489	222.222	11.1607	1.9802	5.51268	6.84463	3.31565	303.03	11.0988	169.492	2.84738	5.17866	8.8968	3.67918	263.158	26.6667	1.55521	303.03	3.26264	2.47402	200	1.8622	2.09556	4.05022	1.9996	3.46981	33.4448	6.03136	9.68992	4.21941	0.922509	192.308	3.83436	64.9351	11.3379	322.581	7.91139	1.17855	6.17284	17.0068
4.72813	1.72712	0.414164	303.03	0.838434	0.897989	0.965437	0.670916	250	0.241674	1.81554	2.03957	0.288976	0.427186	1.14181	12.2399	3.04044	4.21763	0.161371	2.96648	1.33672	1.01626	23.9234	1.18385	29.4118	0.519292	2.02306	7.21501	1.84366	2.37699	2.54194	0.951565	1.00492	1.17966	0.407349	1.67476	2.88184	1.82648	1.26422	0.327643	0.675813	22.5225	4.94071	1.23977	175.439	1.48148	1.23548	0.879894	0.458442	4.85909
1.84638	3.87597	1.23122	25.2525	3.56761	3.32226	2.92569	9.52381	19.2308	4.31034	7.01262	250	0.775194	100	1.03616	1.16904	200	6.39795	232.558	5.77701	2.01045	1.35153	12.2249	1.48743	1.73762	131.579	3.27654	18.5529	5.27704	1.70329	2.63019	3.61664	1.87231	163.934	3.62188	8.7108	2.51636	8.15661	303.03	3.47343	322.581	2.80584	1.98177	8.26446	3.39559	1.05319	263.158	7.24638	277.778	0.739426
2.47036	19.5313	16.3399	13.4953	32.5733	22.2717	23.8095	322.581	6.55738	12.7226	14.7929	5.30504	25.0627	27.027	5.35619	163.934	4.64684	7.33138	9.22509	2.71739	4.58716	8.21693	23.9808	175.439	24.0964	19.6464	7.24113	322.581	20.4918	8.04505	13.8122	1.58378	4.7824	7.01262	13.21	6.22665	18.0505	8.63558	6.77507	18.7266	18.1488	11.1235	9.59693	13.2275	9.7371	33.4448	17.1821	8.48896	7.4239	9.9108
1.11832	23.4192	7.65111	3.70645	7.0028	2.6617	8.3682	7.8125	17.2117	17.6991	5.94177	11.6686	2.39406	7.7821	11.1111	1.79888	3.73134	2.09556	14.1844	238.095	17.3913	16.2602	9.77517	2.52972	17.5439	4.67727	2.44081	103.093	5.09684	11.8203	26.1097	1.39587	5.74053	11.5875	20.7469	2.47586	3.52361	26.1097	17.4216	3.0003	7.28332	5.01756	29.5858	8.07754	303.03	3.52609	1.3282	3.4662	5.89623	5.84795
2.28938	0.101386	1.73792	5.41712	0.578001	0.43163	4.30108	181.818	8.05153	0.950299	13.7363	4.80538	0.285665	0.099995	0.55841	1.1861	0.29723	0.0699584	1.8997	10.2987	0.340148	0.145964	0.0334699	0.103414	0.0572659	0.155308	0.103134	0.179785	0.0407606	0.942774	0.892698	4.60829	3.73972	0.328828	0.11964	2.0982	86.2069	43.1034	46.2963	49.0196	105.263	75.188	66.6667	83.3333	172.414
20.6186	12.4688	22.6757	21.978	14.6199	16.835	6.035	29.8507	10.2041	11.5473	7.6864	54.0541	17.094	5.05817	9.99001	10.4932	16.5017	19.1571	19.5695	4.84496	6.64011	9.76562	24.1546	17.4216	14.7059	18.9036	4.92854	13.459	13.1752	9.52381	158.73	17.9856	5.06073	9.08265	18.5874	26.5957	277.778	114.943	26.1097	9.51475	41.4938	333.333	14.4092	25.9067	18.9036	15.8983	178.571	7.61615	25.3807	277.778
0.673129	0.167692	0.604011	0.03822	0.0106638	0.0368376	0.0826173	0.533675	0.158263	0.213516	0.342536	0.0603387	3.30579	0.100457	0.0543724	0.306598	0.355733	0.434047	0.0950634	0.107063	0.102092	4.3956	1.37306	44.2478	66.2252	63.2911	43.8596	71.9424	52.9101
185.185	18.1159	15.873	42.5532	39.6825	17.5439	30.9598	12.3305	7.84929	47.3934	42.3729	54.0541	41.4938	95.2381	20.7039	9.38086	6.89655	40.8163	8.1103	15.873	22.2717	57.4713	97.0874	17.301	16.2075	35.8423	20.79	17.8571	204.082	27.1003	31.746	86.9565	50.2513	11.8483	8.08407	34.2466	17.6678	21.0526	10.846	43.4783	28.49	15.2207	46.2963	25.5102	147.059	34.2466	166.667	23.0415	131.579	14.8588
7.26744	38.0228	43.1034	31.6456	7.03235	4.44444	9.3633	40.9836	7.4129	41.6667	3.63372	23.6967	2.55102	9.85222	13.6799	2.55037	175.439	6.62691	7.77001	2.58866	4.19111	7.38552	2.10615	26.2467	8.92061	8.97666	6.40205	5.13084	7.38007	204.082	2.42424	7.39098	26.455	23.5849	9.09091	2.84981	17.2712	4.16146	14.8588	5.44662	16.5289	7.4129	5.38503	6.49351	16.0514	3.80228	6.19195	30.03	3.2041	4.48833
0.252423	0.0224299	0.374616	0.249389	1.04844	2.73973	0.158193	0.352547	0.212802	1.19918	5.44662	0.508285	0.482253	2.54777	21.3675	2.09908	6.2461	7.32064	6.39386	2.22222	1.86359	1.68549	5.32198	1.7059	0.547256	0.91083	10.3627	0.382804	1.03477	7.83085	0.177233	1.60849	4.70588	0.435369	303.03	2.151	26.8817	0.125116	3.95413	0.611284	2.67809	303.03	27.7778	10.8578	0.920556	0.516289	0.719891	1.39606	3.79363	3.89864
2.19154	5.90667	232.558	2.64971	38.7597	27.3224	8.73362	26.8817	34.1297	14.5138	28.4091	7.0922	27.1739	14.4718	5.84795	15.2439	6.09756	8.47458	6.45578	1.49566	2.7049	5.64334	9.22509	9.99001	31.6456	22.8833	16.1812	106.383	26.8097	19.5312	11.5875	270.27	153.846	7.07214	2.13265	21.5054	3.66703	6.52316	8.05153	4.01284	2.52972	3.47222	250	21.2314	9.09918	8.88099	5.91017	4.48229	18.1159	4.11353
10.6838	3.41647	3.64431	4.59348	6.40205	3.44116	4.34028	14.5138	212.766	1.12435	10.8814	3.96983	6.43501	2.79174	2.43013	4.41306	4.5045	2.40558	243.902	2.51319	8.16327	4.28082	208.333	2.53678	7.24113	2.86779	9.60615	1.4245	2.67523	3.96197	8.91266	29.4985	181.818	5.29942	5.18941	22.9885	1.99641	2.03915	19.1939	8.75657	1.15035	4.54959	5.79039	16.6945	6.46412	6.20732	0.616371	1.65536	1.33103	12.4688
4.17537	2.84738	0.928591	238.095	1.28684	9.72763	2.36686	3.44828	0.265315	1.59312	3.27118	2.73075	0.820614	0.694686	2.06101	3.09406	1.82749	1.93498	1.93911	3.6036	2.30309	1.70387	3.69413	200	0.666844	1.06746	0.670826	4.43066	0.822301	4.83793	0.508104	0.310251	0.36735	1.11869	10.8932	0.47019	0.912076	0.393515	6.02047	0.966184	0.472054	0.810767	0.198016	0.681663	0.10942	0.571396	0.32438	0.364352	3.57015	0.154562
0.227593	0.188406	0.110897	2.91036	0.0813312	0.0410528	0.00836346	0.0377658	0.0224015	0.0576528	0.237535	153.846
5.92768	28.9855	2.72035	285.714	1.90913	1.51561	4.90436	4.93583	3.23729	0.73888	1.0144	2.22124	5.15198	16.5289	1.52462	4.62749	1.1212	0.923446	8.7108	22.5734	32.3625	1.47667	0.81314	3.81679	2.8169	14.6413	9.79432	3.45304	0.598623	14.881	3.46141	1.514	6.26959	2.54259	4.28082	3.861	1.42389	1.48412	11.5207	1.11099	3.95101	10.9649	20.2429	64.1026	17.6056	1.239	114.943	1.17578	10.3627	1.43
0.483209	2.59471	200	1.58781	1.50648	133.333	1.01833	3.16256	1.58655	1.17523	3.79075	0.643749	8.96057	9.14913	1.49948	16.4204	3.27869	14.7929	7.14286	3.16656	3.80084	1.69348	4.02091	0.954107	2.01776	2.51256	6.49773	1.57011	2.6448	1.21256	2.20556	0.386503	0.912909	2.38379	9.21659	1.26231	0.544366	7.83085	250	0.814531	1.9073	0.819605	0.61024	1.11334	2.59605	2.34852	2.47586	0.923958	15.748	3.86997
1.96386	1.96194	7.54148	0.897747	3.39674	3.50631	322.581	1.87512	1.638	7.61615	7.95545	2.03087	1.17827	0.270446	21.2314	2.74424	4.29	14.2857	3.30688	30.03	5.01756	0.799361	0.941886	1.3224	1.09004	2.06101	2.73224	8.62069	1.23747	285.714	6.03136	1.22339	4.05844	12.1507	2.36742	0.86423	2.71813	6.9979	9.25069	1.49589	1.65044	1.08425	5.21105	3.17259	12.1359	0.585035	9.63391	0.719424	2.64201	13.947
3.37952	81.9672	2.96121	1.43678	8.61326	3.53107	4.25351	6.80272	4.74608	10.6838	10.846	4.55166	9.26784	21.2766	19.6464	36.1011	28.5714	15.2207	10.4167	30.3951	14.1443	12.4533	9.03342	16.9492	20.2429	2.62055	4.22476	42.735	3.43053	25.5102	4.914	1.03993	5.58659	3.79075	3.16256	16.9492	25.4453	27.027	18.8679	8.97666	3.6062	19.685	8.54701	8.21693	6.15385	14.556	4.88759	6.90131	4.4484	4.75285
[truncated: 5,000 more columns]

## Sheet: Part D
Wallace et al.
Microglia depletion disrupts normal functional development of adult-born neurons in the olfactory bulb
Figure 6-source data 1
Each row is one dendrite and each column is the amplitude of each sEPSC.
Control
8.669	11.545	5.257	5.495	14.044	14.659	10.732	7.28	11.109	11.902	5.316	6.288	11.287	5.435	12.219	10.375	14.461	5.197	8.609	9.046	6.05	5.257	6.03	5.971	10.672	5.673	5.316	6.229	5.614	17.833	6.209	5.872	11.347	10.573	6.586	8.411	5.356	14.501	12.874	5.177	6.169	15.552	6.348	5.138	5.792	13.548	5.257	7.816	11.307	7.756
8.847	11.604	9.581	7.875	11.604	8.708	7.34	10.315	6.407	6.487	9.284	5.931	13.37	21.602	10.315	7.34	5.554	13.191	16.068	26.304	7.994	6.725	9.581	6.11	9.899	16.484	8.47	7.26	7.141	14.937	7.518	7.994	7.637	16.663	6.288	13.608	13.668	5.376	5.296	7.875	7.697	6.05	5.971	6.586	6.526	6.288	11.406	6.645	16.464	9.7
15.988	7.578	11.545	25.609	9.284	17.833	10.93	18.428	7.518	9.839	15.75	7.756	15.135	20.63	7.816	11.168	32.294	9.72	9.224	7.498	10.871	6.229	16.861	11.525	7.994	9.323	6.943	15.135	9.581	13.251	16.881	7.141	12.021	19.718	11.763	14.282	12.021	7.816	21.106	11.168	5.733	10.315	15.81	17.139	16.901	6.407	7.756	5.058	8.609	7.201
9.145	8.371	6.467	9.026	17.139	9.522	13.826	9.641	12.2	24.102	5.435	9.819	14.64	23.784	9.522	9.819	13.172	8.728	13.191	9.284	5.138	11.029	5.931	6.645	8.054	7.637	6.229	5.614	10.137	15.433	24.28	15.988	20.015	9.899	8.669	7.875	10.97	13.35	7.855	8.966	10.811	9.76	8.113	9.819	10.315	9.7	36.619	21.404	6.348	20.333
23.011	10.553	5.237	14.401	13.053	54.273	42.113	13.608	20.809	38.384	14.52	36.857	14.025	21.523	27.95	14.223	27.573	8.589	14.937	39.495	7.439	10.256	7.32	8.49	6.963	15.314	10.732	11.724	12.517	14.878	8.768	15.135	9.105	8.232	6.467	6.11	17.516	19.023	13.668	14.163	42.589	31.124	24.399	19.956	9.323	9.879	24.399	31.917	32.651	6.09
7.935	6.467	6.05	5.971	6.764	6.09	6.11	16.405	48.104	10.97	10.553	7.697	13.787	5.118	14.401	10.375	12.2	11.168	8.173	47.965	37.293	9.641	5.316	5.991	5.911	7.756	13.132	9.343	8.907	8.55	10.394	6.725	8.49	25.589	7.697	30.39	9.403	11.168	8.966	10.137	10.593	9.641	10.137	7.697	8.986	18.508	19.162	14.957	6.883	13.191
7.875	7.022	15.671	9.403	16.464	5.237	8.669	7.875	6.169	17.595	5.673	5.237	6.963	5.435	6.11	7.617	6.09	7.578	7.141	15.81	13.548	14.342	7.002	6.903	6.407	6.288	5.852	14.223	5.971	5.138	6.526	6.407	6.784	7.439	7.439	8.55	8.351	20.591	6.844	8.232	8.907	9.165	5.931	5.971	10.613	11.228	6.764	21.682	11.902	13.191
7.439	6.725	11.049	5.614	6.11	8.232	7.002	19.777	13.747	10.256	11.783	9.343	7.855	7.875	8.728	8.292	5.495	8.847	5.673	19.242	6.288	6.348	10.513	11.406	6.209	9.522	7.26	7.578	6.169	10.93	7.498	6.784	8.907	13.687	10.256	8.351	5.852	7.459	7.578	5.296	15.631	9.165	7.399	5.376	9.343	6.407	8.609	9.204	7.875	5.971
11.902	6.467	10.236	6.368	12.081	7.082	8.431	6.407	6.467	7.26	8.788	7.121	6.764	11.545	11.109	9.284	7.062	9.641	6.586	6.824	5.078	15.929	6.11	9.7	12.081	6.407	9.026	5.415	8.907	5.138	7.022	5.753	7.32	5.614	7.201	6.11	5.753	7.439	5.872	15.81	8.55	7.994	5.931	10.494	10.99	8.669	6.546	8.907	5.733	9.323
12.616	8.55	11.604	11.664	7.022	8.907	11.228	9.026	11.724	9.938	7.082	12.934	8.55	13.925	16.048	9.462	21.305	9.541	9.224	7.062	7.558	6.665	7.994	16.127	8.232	8.609	9.145	6.665	10.632	12.636	7.082	8.53	5.931	11.228	9.958	9.046	7.816	7.082	7.518	9.046	20.928	9.879	7.637	14.223	7.637	6.903	5.733	27.593	14.044	8.252
7.816	8.49	10.018	10.632	8.292	10.137	10.553	6.903	10.871	8.907	8.431	15.75	11.287	10.315	11.664	12.815	8.113	14.005	9.125	8.054	14.759	9.899	10.672	11.208	11.168	10.851	6.943	11.823	9.7	10.196	8.252	8.53	7.201	12.934	9.819	13.429	6.209	10.494	10.196	7.994	10.434	12.219	6.328	8.411	7.498	7.002	7.935	8.728	7.578	9.085
6.348	7.201	8.946	8.728	9.581	8.847	8.728	6.665	7.399	5.495	8.669	5.971	8.986	8.252	6.209	7.26	6.249	6.407	9.541	7.26	7.34	7.141	10.851	5.991	8.55	7.082	7.756	7.875	8.748	6.03	6.903	8.669	5.931	8.054	7.875	7.141	8.173	7.34	5.792	6.348	8.371	6.943	10.553	7.34	8.788	7.022	12.934	7.082	6.725	6.288
19.599	75.003	6.288	49.909	10.752	5.614	7.141	6.407	6.963	6.844	16.226	12.457	15.314	8.232	6.705	19.539	7.994	10.93	18.131	6.526	8.728	8.252	6.229	6.09	6.268	8.907	10.315	18.547	5.376	9.403	7.201	7.399	7.32	10.375	5.316	6.844	12.279	6.288	19.539	21.007	8.113	12.755	5.991	16.167	12.338	6.229	6.487	5.733	9.145	6.943
22.713	13.866	13.668	14.818	20.69	12.953	35.587	16.941	9.938	28.188	16.722	15.254	11.426	13.925	13.31	8.609	11.228	18.19	11.902	19.123	14.56	9.958	12.14	7.459	10.315	19.638	25.887	15.869	9.026	21.543	13.429	5.376	17.833	5.495	13.37	14.461	17.714	23.249	19.599	21.543	14.025	11.426	29.22	19.599	12.279	42.589	21.543	13.191	14.818	9.581
5.792	7.935	8.609	12.081	9.204	10.256	8.907	17.337	19.043	6.645	8.292	8.847	28.981	12.319	10.752	6.169	15.85	19.321	19.658	9.839	16.286	6.784	26.502	12.1	22.832	9.105	7.994	5.257	11.962	11.426	5.673	32.235	11.585	20.452	18.924	8.113	22.535	29.973	23.566	12.894	39.495	17.04	7.677	27.137	35.904	9.105	25.51	21.305	20.571	30.806
5.396	5.435	6.11	6.387	5.852	6.189	6.824	7.697	5.396	6.685	7.141	7.756	5.019	8.133	7.161	8.153	6.566	8.173	5.951	7.082	5.554	5.951	8.093	6.546	6.883	5.673	5.832	5.812	5.475	8.688	5.872	5.614	6.606	7.102	5.991	5.237	6.665	6.983	7.201	5.118	5.336	5.475	9.264	13.132	8.431	5.296	7.875	8.53	5.495	6.645
16.881	22.396	8.351	21.9	7.34	8.867	5.495	7.399	5.455	11.902	8.748	5.534	5.415	16.345	23.447	5.197	5.991	30.41	8.093	16.623	8.272	17.337	19.896	5.277	6.665	20.511	10.156	5.197	5.177	5.673	5.931	7.578	6.189	5.812	6.09	7.28	9.7	5.316	16.306	6.883	6.467	8.966	5.634	10.275	7.26	6.011	5.058	5.177	5.872	10.494
8.331	7.002	7.121	8.589	6.665	8.589	7.895	8.074	7.875	6.13	5.554	5.792	5.455	8.589	9.323	6.963	5.574	7.102	6.506	6.427	9.244	5.772	6.625	8.173	6.586	7.776	7.716	11.029	7.637	7.478	5.396	8.292	6.606	5.138	7.816	7.855	6.288	8.827	5.138	7.776	8.55	7.974	10.652	9.541	7.974	10.811	8.867	7.359	5.634	18.547
11.287	5.792	12.12	5.693	8.173	7.102	8.292	7.478	8.371	6.804	9.899	5.634	11.446	6.249	21.265	6.328	13.291	5.614	6.407	8.074	9.284	6.943	5.693	7.756	11.089	9.641	6.229	11.446	9.264	8.589	8.946	8.927	6.883	5.316	11.406	9.978	9.442	10.474	13.112	12.319	6.268	6.883	6.824	8.808	14.501	11.049	9.66	11.029	17.278	10.474
7.221	5.197	8.53	7.796	9.839	5.574	5.019	5.197	13.429	7.419	5.435	6.209	7.26	8.054	5.336	8.212	6.526	7.558	6.011	5.594	5.614	10.414	6.625	8.054	7.796	5.852	5.872	8.47	6.249	6.189	9.442	7.478	11.446	5.396	9.601	5.892	8.054	6.288	6.645	6.11	8.193	11.069	6.368	5.296	6.13	6.11	8.212	7.062	6.844	6.546
10.355	10.513	6.586	5.158	5.772	11.446	9.859	5.614	10.117	7.935	7.082	5.336	10.156	15.056	12.517	11.962	5.713	12.636	12.16	11.347	7.181	5.257	8.708	12.12	9.859	10.752	7.994	5.812	8.649	10.335	7.478	7.915	7.855	6.864	23.189	5.475	12.061	5.277	11.803	5.019	10.533	7.756	7.042	10.037	17.694	7.141	5.356	10.851	8.887	11.803
6.308	5.515	5.515	5.991	9.581	7.062	7.498	8.292	6.506	5.475	8.629	6.725	5.019	18.349	5.396	5.753	5.892	5.991	7.955	10.256	5.177	6.169	5.614	10.236	5.931	7.082	8.45	6.268	5.475	7.419	7.935	5.872	6.824	8.47	7.141	5.078	17.833	6.586	6.368	8.688	7.082	8.153	10.613	8.927	15.393	6.07	5.673	8.788	6.705	6.903
6.943	6.943	64.787	6.923	33.504	35.25	63.795	11.287	61.831	56.991	7.657	5.197	14.282	59.054	8.014	71.849	7.28	6.268	62.248	7.221	6.229	54.511	6.368	7.994	66.691	7.141	5.356	9.859	113.288	8.768	27.771	8.133	8.054	46.537	7.419	34.794	5.951	7.042	9.065	61.97	8.45	73.138	10.335	82.977	19.619	82.441	7.359	8.49	10.533	7.836
16.722	11.783	10.394	6.467	12.338	9.065	7.816	6.427	5.277	7.955	10.652	10.752	10.811	8.153	8.351	6.249	12.338	11.327	9.006	13.251	9.581	7.002	15.969	9.204	8.074	9.284	6.467	7.736	17.179	11.803	12.12	28.228	8.649	5.237	9.125	7.617	8.054	7.697	6.308	14.005	8.51	5.237	5.614	6.447	9.343	7.478	5.435	20.769	7.935	6.526
7.597	9.343	10.553	5.158	7.102	6.189	6.665	6.229	11.902	6.209	5.852	5.931	6.804	7.855	6.983	6.288	10.434	10.752	7.836	12.914	9.165	6.903	7.399	7.974	8.986	7.538	6.705	6.963	6.407	5.812	6.328	5.138	5.872	7.915	6.586	9.541	10.097	13.866	5.098	5.792	6.05	6.249	12.001	9.938	5.574	11.109	8.867	5.534	10.871	7.776
7.597	8.034	6.943	5.753	7.518	6.487	9.958	5.733	10.593	5.058	6.348	5.693	15.096	6.328	10.137	12.319	6.09	6.07	11.902	8.53	9.76	8.391	14.362	5.356	5.177	11.366	6.685	22.594	8.014	9.184	9.383	5.852	5.792	5.852	7.657	8.49	6.05	6.606	5.693	7.379	9.74	5.872	6.506	5.138	5.396	5.971	5.753	8.867	5.217	6.566
5.257	5.197	8.53	5.951	8.351	7.141	7.637	7.379	6.784	5.197	7.161	6.566	6.07	5.376	6.328	5.296	5.911	6.526	6.764	6.149	5.911	9.145	6.685	7.558	6.268	6.903	5.911	5.217	5.772	5.673	7.816	6.943	5.693	5.296	9.244	9.66	5.138	6.09	10.831	6.645	6.883	6.665	8.887	5.495	5.673	5.098	5.039	6.784	6.665	5.892
6.368	10.216	15.433	8.669	12.001	11.089	6.288	8.371	15.314	10.95	12.279	10.712	10.037	21.563	12.16	28.347	12.299	13.628	15.274	5.534	11.029	7.716	9.105	23.983	13.826	11.049	9.998	28.981	12.715	13.707	16.504	8.788	6.764	11.446	10.315	11.763	37.313	9.879	9.879	24.736	5.495	12.319	12.715	9.978	13.826	10.434	26.621	16.603	18.944	10.791
5.455	6.705	9.839	10.851	5.277	9.184	6.447	6.467	6.229	5.971	6.387	5.336	8.292	6.05	8.193	8.133	8.569	5.892	6.229	7.955	19.599	5.991	5.574	5.177	10.613	5.138	7.181	5.336	6.407	5.039	7.657	5.554	6.387	5.475	7.677	6.07	6.963	5.415	6.784	5.892	6.883	5.296	8.312	7.022	6.467	5.832	5.693	8.113	7.022	6.943
5.792	5.534	6.943	7.34	5.911	7.359	6.189	7.459	8.351	5.019	6.07	6.288	7.022	6.943	6.467	5.138	7.796	5.098	6.05	11.446	9.284	7.161	6.169	5.237	6.784	5.415	8.609	6.844	6.685	5.673	7.756	6.308	6.149	7.796	10.652	8.53	10.672	7.399	5.455	222.886	5.574	6.586	7.955	6.864	7.538	5.594	5.415	5.197	5.376	7.141
PLX
8.669	11.922	6.844	13.687	8.113	6.03	18.25	13.31	6.11	5.138	7.141	9.343	11.823	7.756	11.783	10.018	5.931	9.7	7.082	11.128	8.292	11.188	7.617	13.866	6.149	10.553	6.229	12.021	7.796	12.874	8.847	5.753	7.082	9.403	7.697	9.105	6.883	11.287	7.32	10.811	8.55	14.223	7.379	13.668	7.002	8.054	6.963	7.736	8.966	10.871
7.141	6.586	5.733	8.312	6.288	7.141	7.935	6.467	6.883	5.872	7.379	6.467	6.169	5.812	6.288	6.407	9.105	6.844	5.257	7.518	5.852	6.229	5.435	7.875	7.935	6.05	7.201	6.467	5.356	5.733	7.201	6.348	8.054	5.554	7.201	6.169	5.971	6.288	7.816	5.356	10.117	9.938	6.903	5.237	6.705	5.495	6.03	5.376	5.931	9.105
5.296	7.816	5.852	5.019	7.379	6.467	6.288	7.32	5.495	7.379	5.058	5.931	5.058	6.903	9.403	6.586	5.257	7.141	9.839	9.264	7.439	5.296	6.229	6.705	5.376	7.697	10.434	7.32	6.03	6.467	5.435	7.082	5.296	8.292	7.32	5.534	8.609	6.05	10.553	6.467	5.852	5.257	5.257	6.387	5.197	5.257	5.237	5.316	5.257	8.113
6.705	7.518	17.694	21.424	8.966	11.049	14.54	8.788	7.022	18.131	6.229	6.844	25.312	17.278	8.847	7.141	6.844	12.696	10.256	7.439	14.659	6.288	17.159	8.788	6.665	11.585	13.31	6.824	7.875	8.669	10.018	8.55	23.685	7.875	19.361	12.815	8.113	17.456	10.513	10.375	11.228	6.705	7.022	15.909	19.956	7.994	6.348	6.288	6.05	10.077
23.011	12.2	13.31	5.197	6.903	11.843	9.938	10.632	8.113	8.252	12.934	7.062	10.632	6.169	7.875	6.883	8.788	8.312	9.7	5.931	13.568	8.312	22.832	24.042	9.839	15.631	19.361	22.396	33.385	7.677	29.061	13.39	27.771	23.685	15.988	8.927	12.398	24.181	25.946	22.396	9.641	9.204	6.229	16.266	25.212	11.109	29.914	18.309	20.015	8.728
6.407	24.538	9.323	8.371	23.487	10.871	7.558	19.46	8.371	5.733	8.113	7.141	6.467	6.844	8.47	9.641	7.022	20.749	7.875	9.879	7.439	5.971	5.475	37.432	9.66	10.692	23.011	12.2	9.462	6.705	7.28	20.392	9.026	6.487	10.99	9.76	7.617	5.911	26.978	5.991	8.292	5.554	8.292	11.109	9.165	16.107	7.498	6.288	13.489	7.637
6.229	7.082	5.118	6.764	23.864	6.169	5.316	6.407	6.407	5.554	5.911	5.435	6.229	6.348	8.351	5.673	7.26	5.753	8.411	5.991	8.252	7.439	6.407	29.358	6.169	27.216	6.844	5.614	8.252	5.197	5.911	6.844	5.197	6.288	8.788	5.058	5.792	5.991	5.554	7.082	5.376	7.875	7.082	9.522	5.257	7.617	6.526	5.197	6.586	5.554
7.062	8.609	5.237	6.705	6.169	5.911	5.872	6.844	6.03	6.348	13.787	5.554	6.943	6.348	7.637	5.554	7.558	7.399	5.316	5.435	5.376	5.614	6.725	6.427	6.586	6.288	7.816	5.296	10.315	6.526	5.177	7.28	5.138	6.546	6.586	6.467	6.407	7.141	6.288	5.693	7.201	5.971	6.149	5.931	5.257	10.196	5.316	9.026	11.902	5.753
8.292	7.141	8.768	8.728	8.113	7.439	10.851	9.343	11.466	8.292	12.457	17.635	9.641	6.665	14.64	8.232	11.307	9.145	5.872	10.196	13.925	11.545	7.102	10.375	6.348	10.831	9.264	7.816	8.669	6.169	12.497	12.1	13.132	6.348	13.053	5.614	10.752	8.054	11.664	9.641	10.871	5.138	6.229	8.074	7.518	9.323	6.784	10.454	7.935	9.581
7.439	5.197	5.792	7.756	6.963	8.669	5.614	5.554	6.903	7.379	5.911	6.526	6.348	6.229	6.963	7.994	7.578	8.788	6.844	6.169	5.316	10.632	5.614	7.141	6.784	7.379	7.578	5.971	7.578	11.604	11.347	5.911	5.554	7.399	5.971	6.903	6.348	7.756	6.229	9.522	9.403	8.847	6.764	6.824	5.614	5.991	5.435	6.169	5.257	7.082
7.082	6.348	26.78	7.459	20.253	5.852	6.348	5.177	7.022	31.917	6.665	9.403	5.554	15.988	5.554	31.56	13.191	16.544	5.376	21.84	5.614	5.911	9.819	6.288	5.733	25.51	21.483	10.791	5.733	5.177	13.172	14.342	5.138	5.931	7.439	5.177	6.467	7.439	38.067	6.288	24.955	6.725	6.903	6.586	5.316	6.903	5.554	25.153	5.733	5.614
5.435	6.467	9.105	9.76	6.149	9.502	6.526	7.26	5.931	7.637	6.407	7.915	6.764	7.141	6.705	7.32	9.145	5.753	6.229	7.756	5.554	6.725	6.705	8.907	6.883	7.697	10.871	7.022	6.665	7.697	7.26	6.288	5.554	17.159	5.991	9.581	8.986	7.756	6.943	15.869	6.665	6.963	8.49	5.971	11.109	8.609	15.016	16.841	9.462	7.141
11.049	7.935	7.816	6.963	8.55	8.966	9.839	6.467	5.971	8.986	5.614	5.495	5.118	5.673	7.399	7.022	7.637	19.738	8.966	9.839	6.229	6.844	9.105	7.617	10.732	6.427	11.109	8.49	9.165	14.699	18.547	8.292	7.498	8.788	6.963	8.351	9.76	8.966	8.232	6.725	20.749	6.467	6.229	10.871	6.348	6.844	17.397	5.316	22.158	8.312
5.118	8.609	8.312	7.26	7.697	6.09	7.32	5.971	7.518	6.705	7.022	6.764	7.459	7.022	8.312	37.948	6.645	7.637	7.379	6.526	5.177	8.728	6.229	7.399	6.03	6.467	8.966	8.252	7.32	6.645	6.844	6.943	6.229	7.141	8.748	6.407	7.935	7.082	5.753	6.764	6.407	7.141	7.558	5.138	7.439	7.201	5.614	6.705	9.819	7.141
5.693	6.705	5.435	9.145	7.141	5.177	6.606	7.26	6.963	6.844	9.899	7.399	5.118	6.784	6.963	7.578	7.875	8.907	6.665	7.617	8.431	9.76	5.177	6.526	6.348	7.082	5.733	6.963	5.614	6.288	5.852	9.026	5.197	6.11	6.169	7.32	6.903	7.002	6.368	8.649	6.169	6.526	5.296	11.406	6.883	8.312	5.376	6.169	5.237	7.022
6.11	12.338	11.962	6.764	7.697	8.609	6.705	6.586	5.753	6.883	9.224	6.725	6.487	6.288	6.407	6.487	9.224	5.138	6.844	5.257	9.343	5.138	8.173	12.338	8.728	6.526	9.641	8.173	6.546	6.903	5.673	7.082	7.697	7.697	5.435	7.439	5.078	14.223	9.819	11.843	6.526	10.613	10.018	9.403	6.05	7.935	5.316	6.963	9.641	8.312
10.494	5.257	6.606	8.173	5.118	7.558	5.991	5.872	7.221	11.406	6.169	6.844	7.26	6.288	6.963	9.165	8.371	7.816	6.725	7.32	7.379	8.232	5.316	10.315	5.376	5.316	8.788	6.288	7.935	5.554	6.149	10.018	9.522	10.494	5.872	5.614	5.852	9.76	8.193	7.201	6.645	16.425	9.7	6.963	6.05	5.931	6.05	8.47	9.522	6.467
10.097	13.767	18.448	32.889	25.827	12.14	43.998	19.638	16.841	9.046	7.935	8.232	7.439	8.768	5.991	5.336	17.317	9.998	8.252	13.231	13.906	6.764	16.464	5.237	8.589	11.585	10.037	8.827	24.399	14.937	9.958	8.212	16.246	15.85	10.93	20.729	10.93	9.026	15.354	21.364	10.831	8.431	9.125	12.934	10.533	7.002	11.942	8.708	11.069	11.843
8.708	7.597	8.53	5.138	6.864	7.419	5.217	6.229	5.058	6.487	8.53	7.359	6.229	6.804	6.249	6.209	7.042	6.606	8.649	6.546	5.257	6.467	6.625	5.257	5.614	7.875	6.328	5.495	5.951	5.415	10.137	7.895	5.713	8.47	7.181	5.673	5.792	5.415	7.419	6.09	5.356	6.744	5.911	7.796	5.733	10.91	6.09	5.455	6.387	5.019
12.18	8.47	6.348	5.118	8.887	6.07	11.049	16.107	6.09	7.201	7.022	6.566	5.792	7.578	6.447	5.812	5.574	5.475	7.657	5.753	6.011	5.277	7.181	5.892	6.268	5.832	7.082	11.228	7.597	5.078	5.554	5.495	6.923	5.872	6.229	5.058	9.125	5.396	5.495	8.292	7.836	8.351	8.986	6.447	6.705
5.911	7.062	6.447	9.958	6.943	5.415	5.852	8.907	5.693	7.26	8.649	12.418	8.927	15.83	12.735	6.943	6.07	9.621	6.705	5.158	14.203	6.149	6.784	6.189	7.24	8.47	7.221	11.386	5.078	14.699	5.455	10.573	7.578	8.847	8.966	6.864	5.158	8.034	5.376	7.399	16.048	10.652	8.649	7.32	6.983	5.118	5.217	12.795	6.784	16.405
12.061	6.05	6.943	8.411	6.427	7.379	6.368	6.387	5.772	5.296	5.019	7.102	15.75	5.594	5.336	31.977	9.819	8.45	6.209	6.983	7.022	5.396	7.597	5.911	7.697	5.872	5.574	5.713	5.515
16.207	17.714	7.002	12.279	19.123	11.347	11.069	20.035	12.497	14.897	10.335	17.734	13.211	8.867	7.478	13.172	9.343	10.355	9.839	11.545	10.99	9.601	15.909	32.889	12.279	8.728	26.839	20.055	15.512	7.637	13.033	14.6	22.812	15.612	7.062	9.363	16.584	10.771	10.474	11.545	14.243	13.39	7.697	17.734	7.3	10.791	9.046	10.137	8.113	8.173
14.064	12.18	8.907	6.209	10.99	13.806	20.61	11.684	10.018	11.545	9.978	9.085	5.911	18.17	14.58	10.434	7.459	11.386	10.791	9.065	11.743	5.415	5.991	8.887	10.434	15.671	11.466	10.256	8.133	7.915	11.009	5.177	13.211	5.415	11.704	8.649	16.504	10.097	17.516	9.422	7.082	14.977	11.049	7.419	8.074	9.938	6.427	5.475	14.858	6.685
10.593	5.832	5.753	5.058	6.328	5.693	5.098	5.653	5.058	5.634	6.447	5.058	5.495	6.804	6.13	5.991	5.832	6.387	5.336	6.387	6.268	5.316	6.625	5.792	6.03	6.189	5.316	6.209	6.844	5.911	5.753	6.05	5.098	8.391	8.768	6.546	5.614	5.872	5.495	5.296	6.665	5.931	6.05	5.078	6.387	6.387	5.892	5.296	7.359	5.455
5.594	12.874	5.396	12.795	5.832	9.978	8.629	5.118	12.1	9.839	5.832	6.348	10.355	5.534	7.379	8.867	5.534	5.713	5.693	6.011	7.34	9.462	7.855	10.752	8.748	8.867	7.578	5.713	10.236	10.573	10.791	6.586	7.895	7.657	11.247	6.308	11.783	5.812	6.546	5.455	5.772	10.91	8.629	7.478	9.085	5.475	8.391	5.852	7.379	6.11
9.323	7.022	8.768	5.931	11.089	5.733	10.394	8.411	7.022	11.267	6.824	9.085	12.457	5.455	7.597	12.457	5.495	5.772	5.792	8.331	5.138	7.419	5.078	10.057	9.184	10.275	5.039	7.32	10.097	9.046	8.074	5.792	5.316	12.358	13.41	8.312	7.756	14.163	14.163	7.459	5.971	15.691	5.594	9.76	8.669	13.509	8.47	9.422	16.861	6.804
6.526	6.665	5.237	6.645	5.158	6.586	5.892	5.177	6.764	6.368	5.872	5.396	5.594	6.209	5.237	5.534	7.419	5.435	5.118	5.594	5.376	5.534	5.296	5.257	5.058	5.078	6.447	5.019	5.237	5.892	5.614	5.733	6.268	5.653	7.082	5.019	5.058	5.277	8.371	5.911	5.772	6.13	6.685	5.435	23.328	5.316	5.039	5.733	5.554	6.447
14.501	5.931	5.058	5.713	7.359	5.772	7.617	25.034	9.839	5.852	5.356	5.673
7.32	6.606	8.867	8.609	8.391	5.237	8.312	6.645	8.014	6.705	11.029	5.812	6.705	8.748	5.078	5.951	10.632	6.387	7.657	8.431	6.407	10.89	5.673	8.093	7.935	5.495	7.935	7.478	9.621	5.376	5.396	5.515	8.391	5.455	6.11	5.832	5.296	8.113	7.677	6.387	6.268	28.089	8.55	19.023	14.104	6.387	5.435	5.554	7.359	6.169
6.447	6.387	6.487	25.451	7.022	5.356	6.586	6.249	6.804	8.966	18.448	5.892	13.41	10.137	5.039	16.405	23.149	6.03	6.07	15.453	5.237	8.351	19.004	13.211	19.599	28.585	13.509	22.058	15.83	14.759	7.221	19.976	5.158	6.07	20.848	8.054	24.479	8.312	7.32	5.892	7.736	6.744	6.11	13.608	9.065	8.49	9.74	5.277	25.728	7.399
9.026	9.085	5.515	8.589	8.193	11.049	7.895	9.006	9.442	7.161	7.915	7.677	8.867	6.506	6.943	8.312	9.958	8.252	6.586	12.576	5.336	5.316	11.525	10.156	5.039	9.74	7.439	9.899	7.32	7.359	9.065	5.892	6.149	7.677	6.744	5.078	6.804	5.594	9.502	11.724	6.844	6.943	20.591	8.748	5.058	9.978	12.775	6.467	7.082	10.732
6.07	15.651	14.759	7.974	15.354	11.188	13.191	6.368	5.296	10.712	21.146	14.144	7.756	10.474	6.09	6.268	7.141	6.705	5.594	15.393	9.581	10.176	7.697	21.959	10.99	10.037	9.581	12.715	5.475	6.903	12.834	7.379	6.586	22.177	8.768	5.594	11.029	5.673	10.454	6.645	8.272	14.362	9.145	7.24	6.368	7.102	5.376	19.956	6.149	6.09
[truncated: 5,000 more columns]

## Sheet: Part F
Wallace et al.
Microglia depletion disrupts normal functional development of adult-born neurons in the olfactory bulb
Figure 6-source data 1
Each row is one dendrite and each column is the frequency of each sEPSC.
Control
0.414731	11.7925	0.0284886	0.109492	1.29836	0.0602214	0.0586411	17.7305	0.301832	0.310231	0.131683	0.949668	0.0504108	2.61165	0.968148	0.0768622	0.178648	0.10436	0.0731909	0.597086	0.385654	0.127102	0.204696	0.134512	0.117588	0.114205	0.157488	0.697983	0.155953	0.100017	1.17772	0.115731	0.118377	0.0647874	0.653595	0.344519	0.196052	0.166467	0.358641	1.43102	5.88928	0.397188
0.458337	0.147929	0.26178	0.163883	7.14286	0.749064	0.225917	0.0562082	4.5208	0.198878	0.46845	0.0640993	1.04134	3.44828	0.108601	0.176822	0.0651182	0.0797366	0.233046	0.0654536	0.197243	0.273688	2.39751	0.0907935	0.0818304	0.148949	1.93536	0.440937	0.360373	0.149114	0.160886	0.302957	0.206492	0.214532	0.0350935	0.543537	0.239017	2.20313	0.582751	1.27926	0.167045	0.133346	0.0328082
0.324633	1.05009	0.216291	0.0868787	1.31458	0.524962	0.176423	0.13459	0.0257763	0.0579811	0.131406	0.14622	0.236916	0.0794628	0.0297489	0.0943993	0.307276	0.0415263	0.130348	1.70416	0.0439994	0.0551475	0.078969	0.0446186	0.191095
2.1796	1.9972	2.23015	0.964413	0.594248	0.341157	0.550085	0.040216	0.0235022	0.0364574	0.0845251	0.164965	0.0529339	0.0751812	0.0426239	0.0573694	0.132174	6.04961	0.13303	0.413479	0.0516129	0.858001	0.0636926
2.91715	7.06714	0.240941	1.53775	0.142757	0.911826	1.78063	1.18008	2.69469	0.308309	0.434575	0.17916	1.55666	0.133483	0.326424	0.146957	0.0924197	0.193783	0.217141	0.052751	2.64271	0.0499548	0.192871	0.242842	0.163319	0.129076	1.82916	17.3611	0.327107	1.11595	2.15657	0.249327	0.534645	3.30142	0.279111	0.165456	1.90295	1.20322	0.968054	1.89789	9.70874	2.23264	1.03972	0.663438	0.447047	0.289939	5.24934	0.81626	0.308623	2.096
1.31044	1.64069	0.249863	0.260539	0.110495	0.777303	0.260051	0.122641	0.0892061	0.273763	0.459053	0.100786	3.23729	0.209991	1.37024	0.0716486	0.0906495	0.118744	0.13351	0.219245	0.129519	0.125343	6.7981	0.0943272	0.195702	0.306466	0.274168	0.0954791	0.107445	0.0611763	0.0550879	0.110474	0.113807	0.161049	14.3062	0.26984	3.04692	0.110335	0.455042	0.0745018	0.077179	0.327054	4.06174
1.32556	0.921489	0.214966	1.35099	1.28386	0.586786	0.728438	0.529717	0.292449	3.30579	0.131558	0.157304	0.0462462	0.0252871	0.0365392	0.321048	0.0532439	0.0127879	0.0241583	0.0717242
0.422851	7.8064	10.661	3.06279	0.512295	12.5786	1.5758	0.242313	0.0565944	0.0441279	0.621118	2.66596	0.442674	0.825219	0.0731845	0.048847	0.20191	0.0919185	0.785423	0.241359	0.303251	0.147434	0.139716	0.141235	0.080692	0.0684781	0.450369	1.17288	0.176152	2.07987	0.276167	0.251756	0.0512836	0.742666	0.222712	0.534102	0.0596225	0.0674036	0.346141	0.749625	0.236748	0.300806	0.415628
3.26052	0.71398	4.31779	0.903261	1.09493	0.164799	0.176448	0.428192	1.0305	0.352175	0.533476	1.40371	0.0538813	0.218775	0.0485814	0.0836813	0.107087	0.348092	0.368433	0.600384	1.47362	0.0835157	0.12153	0.174292	0.229247	0.120181	0.101378	0.397567	23.8663	270.27	13.8504	0.200654	0.339052	0.433651	0.142678	0.0986738	0.691372	1.17398	0.264424	0.560255	0.84317	0.129651	0.19459	1.54059	0.483536	0.0541794	0.869792	0.420592	1.35465	0.463521
0.0250896	0.0355343	0.0806699	0.991572	0.0791609	0.0347268	0.0492739	0.0849538	0.105677	0.14347	0.215373	0.0175076	0.0481508	0.142927
0.245224	0.442106	0.520508	0.557973	0.0259958	6.77507	0.238994	0.485131	0.0435939	0.0344172	0.0577697	0.114825	0.114385	0.13377	0.240142	0.0711425	0.0310307	0.13875	3.55999	0.0693731	0.0582859	1.25266	0.438539	0.325002	0.0819323	0.0894318	0.105579
12.0192	0.877501	3.08547	1.07515	0.82149	2.65393	1.39762	0.39285	0.395664	7.76398	0.749625	3.94322	0.420504	0.244153	0.860511	0.608273	0.0729975	0.305418	0.204746	0.185856	0.174201	0.336044	0.267881	0.462022	0.467596	0.376932	0.279181	0.155084	0.14914	0.764234	0.483629	0.0983603	0.43875	1.2987	0.220226	0.160681	0.174654	10.8342	4.5977	0.162941	0.930752	0.106019	0.475421	47.8469	0.146064	0.140653	3.08452	0.234632	0.637308	0.0640861
0.318888	5.67859	0.249906	0.943841	3.93391	0.190393	0.273703	0.403535	0.495884	0.238413	0.835422	0.117069	0.202548	0.250081	0.403258	0.240321	0.178161	0.108632	0.452673	0.425152	0.218112	0.161051	2.16497	2.41779	0.478194	0.352671	1.05197	0.95057	0.357398	0.0511818	0.104953	0.677553	0.563539	4.30478	0.614931	0.441034	0.192741	0.134996	0.147695	0.147191	0.198318	0.0544802	0.385951	0.294586	0.495246	1.68492	0.423675	0.195255	0.427241	0.326052
0.882145	0.05587	0.430459	0.392727	2.31589	0.145921	0.747272	38.9105	0.475285	1.59515	0.16518	6.96379	0.207482	0.831117	0.237096	0.144175	0.181736	0.0468617	0.910498	0.134657	2.04625	0.438982	0.0581034	0.226137	0.0530552	0.756487	0.0434456	0.299124	0.0481355	0.171435	0.041659	0.1179	0.171347	0.203629	1.48588	0.492393	0.105259	0.0446828	0.231965	0.220459	0.413087	0.699839
0.470411	0.10663	0.0400535	0.248899	3.84468	0.148104	3.80518	0.13028	0.110818	0.78235	0.297362	0.855359	1.41523	0.188961	0.0423103	0.151252	0.541653	0.803084	0.0427789	0.400962	0.21787	5.56483	14.9031	0.0913225	0.297814	0.753807	2.02224	0.331192	0.910913	0.0397951	0.0537715	0.128974	0.0351448	0.121039	0.743439	0.317692	2.51699	0.373274	2.05719	4.61467	0.272658	0.218536	0.727749	5.16529	1.25235	0.57019	0.27245	0.156465	0.227863
1.74338	0.648719	7.06215	0.644496	5.14139	0.288118	3.78788	1.74155	0.071185	0.363716	0.573493	0.529549	0.320749	0.285951	0.313381	1.27861	0.392234	1.08613	1.9044	0.389166	9.4162	4.06009	0.893495	0.563	0.127207	0.136661	0.459897	0.0730877	0.418953	0.599808	0.41198	0.934317	1.514	1.12284	1.97668	0.66291	0.160102	1.22986	0.687805	1.1722	0.517545	0.18909	303.03	0.737463	16.3399	0.270724	0.378415	0.60551	2.46488	0.274808
8.77963	1.37118	0.171465	3.34896	0.108102	3.23834	0.110193	0.565387	2.89184	0.201499	0.593965	0.278242	0.626841	27.7778	1.88466	0.192931	0.528346	0.134695	0.456871	0.415939	0.470146	0.754489	0.378058	0.800833	0.269012	0.125182	0.122193	0.259424	0.390976	0.101933	0.200892	0.17712	0.761267	5.84454	0.160069	0.233296	0.130208	1.82448	0.0772439	0.15208	0.113075	0.0607766	0.277724	0.639468	0.0559062	0.0340754	0.185285	0.630994	13.6426	0.379622
0.132195
0.164201	0.303003	0.0547945	0.0633228	0.19422	0.0773282	0.0645369	0.0792286	0.0672522	0.244469	0.313607	0.0471247	0.378186	0.146673	0.128703	0.20544	0.0747211	0.0615752	0.182229	0.24223	0.0602973	0.0494619	77.5194	0.0280562
0.032501	0.0779205	0.530588	0.233951	0.0226477	0.189624	0.509217	0.0385608	0.445295	0.0215993	0.0510405	0.0583451	0.0744724	0.0195551
0.163223	0.0286339	0.00923172	0.251908	1.40469
0.249184	38.0228	1.41024	0.189122	1.16387	0.298401	0.420415	129.87	1.239	1.95656	0.128979	0.0847357	1.39723	0.0197528	0.148989	0.054222	0.798021	0.766225	0.0595118	0.0431596	0.0784474	0.0369764	10.5597	0.0370807	0.035122	0.0931342	0.0899224
5.21105	1.32188	0.0686615	1.04932	4.3122	1.10534	0.174615	0.392526	0.723118	0.0904658	0.16405	0.378917	4.27168	0.0989306	0.126334	0.159117	0.327257	0.282781	0.111104	0.0695952	0.464447	0.384882	0.17411	0.0878372	0.0518548	0.291715	0.274733	0.229885	1.45285	0.840972	0.0838146	0.471988	0.120322	0.163193	0.140621	0.549451	0.16647	0.307958	3.59195	0.125171	1.23092	0.0924667	0.321481	0.130625	0.0583107	0.162872	0.131567	0.266724	0.296965
2.75255	0.0314908	0.23423	0.401171	0.172601	0.0689132	0.0545411	0.175636	0.113098	0.0803626	4.85201	0.108841	0.303951	0.0916397	0.0258446	0.218756	0.134217	0.0349385	0.057019	0.0406898	0.0553587	0.0737463
0.143297	0.138885	0.0770582	0.0916901	0.0173123	0.16081	0.167943	0.208403	0.232813	0.127995	0.0739869	0.0553802	0.027151	0.84868	0.178123	0.0358496	0.105223	0.121081	0.137144	0.637511
0.0211894	0.512558	0.00917675	0.048455	0.0605818	0.0493116	0.080262	0.0572079
0.109463	0.125726	0.523067	0.158748	0.0342594	1.08802	0.0730556	1.4988	0.141046	0.0599118	0.153273	0.0429161	0.0594308	0.110667	0.457603	0.129089	0.217941	0.0480416	0.449438	0.852733	0.925754	0.0732418	0.465831	0.315647	0.0962112	0.120812	0.276817	0.269447	0.318107	0.160408	0.688042	0.0655458	0.109842	1.47907	0.460745	0.644745	0.146673
0.985707	0.760688	1.3369	0.16108	0.202897	0.208842	0.094084	1.03896	0.232445	0.0931715	0.0846475	0.114097	0.422905	0.725163	0.130856	0.12223	0.0474674	0.414577	0.102505	0.161332	57.1429	2.65393	0.238237	0.160622	0.284487	0.242913	0.215285	0.124296	1.28982	1.22294	0.304062	0.471054	1.11334	0.0873927	0.0952553	0.343407	0.341204	0.24079	2.10393	0.655953	0.349211	0.300761	0.281627	0.508104	5.32198	1.6909	0.750582	4.97265	0.32962	0.130911
0.242401	0.896057	0.248238	1.96386	1.0791	0.388923	1.54036	1.374	0.973331	0.0728078	0.04009	0.150033	0.165631	0.0515991	0.285087	0.150509	0.0333136	0.0683032	0.3429	0.0406359	0.134964	0.620001	0.283014	3.9968	0.253646	0.178658	0.380575	0.0290868	0.125382	0.163239	0.0773946	0.743108	0.0376703
PLX
0.372953	0.0455942	0.0219963	0.0355187	0.146692	0.0483695	0.0577537	0.0584443	0.0719326	0.944198	0.93188	0.0807637	0.117567	0.212703	0.0436643	0.190505	0.0894694	0.278637	0.546747	0.0876424	0.193005	0.130582	294.118	0.101891	0.272926
0.286197	0.240703	6.69792	0.637755	2.74499	0.539345	0.285739	2.48262	9.54198	0.189944	0.55145	0.19167	0.163886	0.600709	2.57334	0.225311	0.190574	0.182412	0.596445	6.78887	0.255526	0.311847	0.208633	0.104839	0.0680416	0.212274	1.87864	0.0556842	0.152483	0.444405	0.142432	0.124022	1.25628	0.636173	0.321213	0.179022	0.211349	0.757174	0.375657	0.0669308	1.56421	2.35018	0.157699	0.359312	0.21561	0.127701	0.301686	0.720773	0.465051	0.504796
0.0204316	0.115315	0.017553	0.0606605	0.0558519	0.114504	0.0244055	0.0322656	0.0546108	0.0353171
0.0384466	0.00938594	0.025051	0.024267
0.0326332	0.247948	0.108905	1.63479	0.0629259	0.0668677	0.0365089	0.0659287	0.0391569	0.131987	0.0448159	2.09074	0.0850933	0.0441946	0.0316977	0.464253	0.0532649	0.094856	0.231562	0.142649
0.139796	0.345483	0.0426683	0.571167	0.0976486	0.0814591	0.067896	0.28204	0.37165	0.32352	0.0640763	0.6672	0.0883681	0.0540576	0.0611378	0.0748834	0.099979	0.0388381	0.106525	0.095095	0.115528	0.322956	0.0628555	0.511457	2.58732	0.139053	0.114033	0.0806328
0.00539527	0.119729	0.0187624	0.170274
8.51789	1.83217	15.625	1.27291	3.48675	3.75375	4.69263	1.44949	2.17439	4.23729	7.46269	0.720565	37.7358	3.73692	10.1626	0.401865	2.97708	5.49753	0.808734	1.67813	0.873134	3.08737	0.816927	0.378415	2.79799	12.1507	0.782534	0.413291	0.967024	1.76243	0.181123	0.757289	2.22965	0.512085	0.258491	9.99001	0.354849	2.34137	0.659674	2.82406	0.402301	3.3389	0.527259	0.118714	0.095249	0.137788	0.593718	0.274952	0.04915	0.535447
0.312979	0.0195382	0.0404711	0.447668	0.0730877	0.844523	0.0279074	0.0446088	0.104803	6.48929	0.0704657	0.497191	0.0953071	0.0574073	0.0278404
0.0339449	0.429332	0.0286585	0.717978	0.0640623	0.33162	0.117225	0.373636	0.1196	0.194447	0.776036	0.827198	0.187931	0.897666	0.798085	0.532453	0.0700314	0.0666014	0.160385	0.25091	0.03921	0.934492	0.481742	0.0670282	0.0955274	0.0579223	0.533903	0.715154	0.569703	0.693674	0.378515	0.168788	0.094345	13.4953	0.0848328	0.366206	0.7122	1.86324	0.530223
19.5695	5.27983	44.843	2.918	3.08737	7.83699	2.20556	1.39821	0.477054	6.29327	1.41283	1.76897	1.6	1.79921	3.03306	65.7895	0.510438	1.15088	1.38122	0.397772	0.309885	0.196757	1.40528	0.562841	0.174061	0.420875	0.869263	1.0008	0.497043	2.14133	0.177771	0.485201	0.477737	0.123551	0.447888	1.20192	0.189635	0.136876	0.982318	0.346033	0.989511	0.173391	0.259262	0.636821	1.13611	0.701164	0.170748	0.165177	0.0776373	0.428725
0.405828	0.573263	0.14334	1.18864	1.38793	0.909587	0.167937	1.32573	0.151414	0.163287	1.24425	0.112212	0.927644	0.382088	0.0832314	0.953107	0.504847	2.54323	0.19076	0.604522	0.0421416	0.21199	0.969274	0.298392	11.4811	0.360933	0.136588	0.274718	0.591471	0.139968	0.597193	15.1057	0.102425	263.158	1.48876	0.144783	0.518888	0.165256	5.08906	0.830289	1.40449	0.771367	0.153508	0.290023	0.42203	0.200981	1.38102	0.116561	1.47124	1.27796
1.42592	0.648172	0.256601	0.375573	0.0996929	0.140708	0.0482789	0.0586101	6.65336	0.339109	0.0455687	0.0672703	0.411862	0.0545325	0.88269	0.0520776	0.113025	0.453823	0.221273	0.229326	0.333333	3.43053	0.316136	0.162824	0.399393	0.0473684	0.210009	0.0636639	322.581	0.585309	0.283334	0.0716168	0.233989	0.044416	0.492562
0.561073	0.401945	0.657289	0.503297	0.693914	0.501857	4.83092	0.0585463	0.792896	0.238436	0.0784474	0.392896	0.346464	0.278064	0.190035	0.320359	1.66889	0.60595	0.0723029	0.0914244	0.193263	0.231214	0.197422	0.75375	0.0383516	0.454897	0.138889	0.036943	0.69808	0.103293	1.44781	0.120008	0.16358	0.0606719	0.0407609	0.123347	0.043042	0.162369	0.252902	0.619348
0.107892	0.0301069	0.00643213
1.26936	0.216671	0.243968	0.552792	0.309004	0.0686974	0.288101	0.0971883	12.9534	4.14938	0.177157	0.177051	0.191835	0.325956	0.208507	0.0827315	0.227993	0.337929	0.0724711	0.209938	0.152837	0.881057	0.087421	0.501002	263.158	181.818	0.15794	0.993246	0.167098	0.224896	0.0541126	0.258967	1.78699	0.420875	0.260105	4.38596	0.109735	0.118913	0.474203	0.0949433	0.884643	0.257925	0.0848688	0.18604	0.944376	0.284965	0.296349	0.121123	0.213598	0.99167
0.0657479	0.0212787	0.10597	0.0141126	0.0522698	0.0193228	0.646914	0.0430867	0.117534	0.101501
0.0421196	2.57202	5.9952	0.260627	0.802246	0.15915	0.962649	2.94464	0.124988	0.791077	2.15936	2.86287	6.73854	2.01491	0.0784468	0.793651	1.34935	2.80034	0.803213	0.877501	0.157806	0.117823	0.675447	0.301796	8.99281	0.936505	1.28123	2.20897	25.2525	42.3729	0.939408	0.542505	0.200473	0.377259	2.87274	1.43266	1.32013	0.239964	0.13295	0.290225	0.730407	0.445196	0.242031	0.1388	0.577768	0.238578	0.832432	0.746714	4.095	0.417554
0.805412	2.58732	0.747328	0.76599	0.463499	0.325425	0.291562	0.338112	0.24613	69.9301	1.88182	0.214156	0.379478	0.0783877	0.317078	0.26425	0.119653	0.187822	0.387522	0.156602	0.440393	24.0964	0.205596	0.0814983	1.48743	0.105687	0.14095	0.291494	0.0702509	0.221224	18.5874	0.220697	0.157347	0.134135	0.647668	0.0215102	0.359738	0.0575427	0.140304	0.491957	0.181802	0.630795	0.349822	0.0427204	4.16667	0.0489889	1.16564
0.108654	0.0175363	0.220814	0.3108	1.27551	0.08198	0.0654973	0.00781583	0.0723867	0.0935078	0.0606505	0.128967
0.259855	0.176919	2.38663	0.687238	2.26244	7.73395	0.216642	1.35685	7.89266	3.74392	0.568408	0.110125	0.391267	0.435692	0.355682	0.125556	0.390671	0.720877	0.654322	0.648635	0.423908	0.124688	0.351952	0.997208	1.19689	0.200654	0.699105	0.384172	0.168166	0.188811	0.465744	0.447287	4.58085	0.253331	0.426949	1.46413	0.155487	0.49995	0.897585	0.130484	0.0608921	0.586648	0.359725	0.248176	0.200236	0.980777	0.528374	0.398676	0.713929	0.10143
0.0144401	0.0224737	0.380257	0.115417	0.0603817	0.0461174	0.0844687	0.0302068	0.0787668	0.0369385	0.0369293	0.227355
0.0984281	0.56281
6.92521	1.22264	2.19058	6.00962	0.510777	0.156735	0.195042	1.9558	0.446887	2.6295	3.09789	0.309205	0.584522	11.0132	1.45285	1.47907	0.552975	0.0994777	0.109459	1.03541	0.566797	5.72738	0.431481	3.31455	0.195748	0.208173	0.718494	1.03552	0.421496	10.1215	0.388818	0.209802	0.841538	0.274333	2.66951	1.04188	0.244272	0.916086	3.39328	1.50105	0.362739	0.397915	0.221195	0.256213	0.296051	0.562114	0.0335263	0.538445	0.398073	1.21403
0.547825	1.0627	0.638733	0.193424	1.4652	0.536251	0.287936	0.812084	0.521023	0.879662	0.0938078	0.0785151	0.676636	0.206834	3.94945	0.242512	3.79939	1.27632	0.87581	0.12388	0.608902	4.4287	0.148392	1.20715	0.415783	6.9735	0.28368	0.433257	0.0493559	1.29182	0.68937	0.434915	0.381709	0.212608	0.102097	4.50653	0.540278	0.571102	0.0680161	0.137391	0.122901	0.334482	1.42369	0.305998	0.0598684	0.35643	0.579139	0.181278	1.89645	1.28057
0.289662	0.0527226	0.182269	0.115749	0.269193	0.057167	0.0268417	0.822098
0.245839	0.17175	0.0866408	0.0623924	0.440063	7.8125	3.57398	2.92227	0.281452	0.367661	0.141241	0.320031	0.175423	0.151819	1.70358	0.156299	0.411455	250	0.427223	0.347234	0.77991	0.232191	0.0582689	0.699447	0.469792	0.107898	0.403861	0.34632	0.271304	0.260647	0.186379	2.54453	0.535103	1.221	0.123154	0.454401	0.183127	0.910249	0.233117	6.48088	0.63674	0.0634433	0.142157	2.58065	13.245	1.01958	0.123571	0.53723	0.230585	0.412984
0.0655441	0.275535	0.0676663	0.0545078	1.93836	0.246378	0.0265984	0.18615	0.0446104	6.77966	0.0670803	0.182658	0.212571	0.0886761	0.0502205	0.0473732	0.0438997	0.0332269	0.903098	0.049682
0.140031	3.63901	2.49501	0.252666	0.589936	0.160831	0.277994	0.0756893	0.288834	0.234571	0.351964	0.565451	0.368895	0.0766889	3.27761	1.71939	2.46245	0.164376	1.35759	0.657635	1.06112	0.555648	0.0991513	1.46606	0.146905	0.957763	1.50716	0.160588	0.0513909	0.535906	0.282941	0.158411	0.367674	4.41112	0.11637	0.528262	0.0616283	0.968711	0.0946181	0.181123	0.389241	0.119367	0.817929	2.34522	0.0813921	0.534588	0.269085	0.178015	0.309004	0.461702
1.08897	0.897344	0.975324	4.85437	1.15407	0.201674	0.669344	0.343418	0.369754	7.88644	1.94363	0.883548	1.56055	4.04204	3.427	1.71585	0.818063	1.07089	2.82725	2.22767	5.49753	1.88147	0.466309	2.89771	1.33387	1.70853	0.837311	0.524659	1.15207	0.874661	1.08295	2.54647	0.103757	0.211519	2.13038	0.305427	0.193667	0.344994	6.22665	1.25802	0.537115	1.16117	1.68663	0.704325	2.9577	1.1773	0.62818	1.08472	1.12473	0.920048
[truncated: 69 more columns]

## Sheet: Part G
Wallace et al.
Microglia depletion disrupts normal functional development of adult-born neurons in the olfactory bulb
Figure 6-source data 1
Each row is one dendrite and each column is the amplitude of each sEPSC.
Control
10.553	16.167	17.02	8.589	9.224	14.461	12.696	17.893	12.457	22.098	38.404	25.014	12.874	22.812	35.389	9.7	14.223	21.959	17.575	33.623	11.049	16.901	9.581	10.375	23.011	18.746	22.951	15.869	11.783	32.532	38.325	10.672	23.507	20.809	12.2	14.58	9.522	12.696	24.637	13.35	26.383	36.44
21.92	8.292	15.81	8.431	9.998	28.069	9.145	42.53	29.834	27.335	11.109	30.747	10.99	42.232	12.219	35.468	41.875	42.054	38.999	17.774	40.348	36.5	22.634	31.322	11.525	12.815	48.084	12.934	44.752	39.118	20.63	13.053	9.958	8.054	9.224	23.566	39.435	10.295	15.671	40.943	10.375	10.732	8.966
10.93	14.282	10.315	8.113	9.581	8.054	9.7	9.641	13.35	16.722	10.494	47.35	14.759	8.371	8.669	11.902	10.732	14.957	17.278	35.706	20.63	24.836	16.544	10.196	11.724
16.841	14.282	16.722	8.788	10.791	9.998	9.938	8.728	9.026	8.232	17.575	8.609	15.314	12.755	9.7	8.133	14.878	13.787	8.847	19.341	11.843	12.279	12.775
10.077	12.576	10.375	9.204	8.847	13.727	8.411	9.522	16.068	9.343	8.669	8.431	9.78	12.398	8.966	9.879	8.728	11.902	19.42	14.163	13.925	9.958	8.589	10.077	17.417	16.425	25.986	16.841	14.778	10.196	19.103	13.985	12.16	31.382	17.397	11.426	14.401	15.393	19.718	16.841	10.851	16.068	15.016	13.053	12.378	15.691	13.529	13.965	12.576	11.228
10.137	8.847	9.601	10.315	8.847	10.236	13.429	11.287	16.841	10.732	10.732	9.938	11.406	11.664	13.35	16.048	13.806	10.077	10.137	8.292	22.535	10.91	12.021	8.53	8.55	9.641	12.14	12.14	9.224	8.49	9.403	11.843	9.78	9.085	10.494	10.236	10.93	12.576	11.168	11.664	8.609	15.135	14.838
10.256	10.871	9.165	8.55	8.054	9.819	8.669	9.819	9.998	9.026	11.168	9.026	8.351	13.727	8.411	8.728	10.553	8.609	8.232	13.013
10.851	13.37	8.907	9.522	9.938	9.343	10.077	9.522	11.029	11.109	11.783	11.287	14.104	10.99	16.345	17.516	11.228	19.599	14.778	12.993	22.535	10.077	13.806	11.704	9.284	19.222	13.489	15.512	16.901	13.191	12.517	11.109	10.077	14.58	46.676	15.492	8.669	22.336	11.347	12.041	10.077	15.016	8.966
10.434	8.728	12.2	8.232	13.31	8.47	9.819	11.228	8.411	13.608	21.801	15.81	8.252	17.754	19.896	38.027	17.694	13.251	32.651	9.78	14.778	16.226	10.137	9.879	11.843	15.135	15.869	11.109	11.228	12.874	15.195	27.414	8.728	24.36	15.016	12.457	18.428	30.39	10.672	13.925	13.31	16.167	9.78	25.927	15.929	16.544	18.607	13.747	13.191	12.457
30.588	10.672	8.788	13.787	14.957	25.133	21.543	29.735	20.749	42.49	15.254	23.308	21.364	23.328
10.93	28.565	19.718	8.411	9.819	18.547	14.719	12.021	10.117	16.286	13.231	8.788	12.2	13.668	10.811	8.55	9.522	12.14	19.718	23.308	13.37	13.727	14.203	12.259	12.457	11.347	20.194
11.287	10.454	10.99	13.548	11.228	10.93	10.018	14.223	12.457	19.896	10.315	9.462	10.632	21.245	9.581	25.451	9.76	12.279	23.983	12.16	11.724	21.166	13.191	22.217	10.672	17.952	25.946	12.576	10.196	8.49	25.649	10.434	12.398	10.077	10.692	9.403	12.993	19.956	10.434	18.071	21.543	16.603	15.254	14.897	20.035	11.902	8.371	11.109	17.159	11.247
11.704	14.759	8.788	9.839	13.548	13.806	15.81	13.191	14.957	12.259	9.641	17.436	9.165	9.204	10.494	11.724	8.312	28.922	19.46	16.127	19.956	8.351	15.691	10.811	10.613	15.195	11.228	10.871	25.708	10.494	13.906	15.929	16.425	17.635	24.717	15.988	21.682	12.398	22.158	11.902	30.707	25.827	11.783	20.372	22.475	8.53	19.757	15.135	18.131	25.629
16.306	9.601	12.438	8.371	12.398	11.168	17.159	21.424	10.057	16.782	12.14	20.749	9.085	11.545	10.434	8.589	10.692	14.719	15.671	15.631	12.755	8.054	11.763	15.334	25.153	10.752	17.754	8.411	8.907	11.525	11.783	18.686	23.308	8.966	8.054	8.252	10.613	14.461	12.755	8.054	24.538	16.107
8.093	11.366	22.713	10.156	20.412	10.275	24.816	30.489	22.098	13.053	15.592	20.352	13.291	10.672	27.91	12.656	12.953	89.841	12.16	20.015	34.972	26.522	9.918	27.414	16.068	56.178	9.145	12.696	8.609	13.985	11.545	29.16	12.874	50.802	21.82	9.839	18.488	18.289	10.573	10.791	15.274	16.564	32.374	26.899	17.536	13.489	14.699	32.016	24.3
9.998	9.184	20.313	14.203	13.072	9.76	9.72	8.292	8.688	10.434	14.203	12.775	36.202	40.606	16.167	8.788	12.477	9.78	26.046	10.97	17.377	8.867	13.41	9.264	15.671	19.678	10.394	17.873	19.321	24.062	14.917	15.75	11.981	15.492	11.981	18.904	14.937	27.732	16.226	10.295	19.678	8.986	8.748	10.018	17.298	16.98	12.576	12.874	9.343	10.216
9.879	8.887	15.195	15.85	9.819	10.117	8.966	11.247	8.232	10.434	23.11	17.992	9.363	8.312	12.041	13.35	10.394	8.907	11.724	11.307	9.145	14.778	10.117	9.244	8.609	11.525	12.239	8.569	9.541	9.978	12.061	18.706	18.032	9.184	9.7	9.462	10.018	13.112	11.763	15.85	9.78	14.243	8.55	8.232	13.37	15.929	11.208	8.054	9.046	11.763
8.351
14.025	9.224	10.771	9.264	12.934	10.275	26.184	9.065	8.966	8.45	10.057	8.609	11.208	15.334	11.525	11.148	30.152	13.846	10.275	9.442	12.953	13.548	9.76	13.092
8.629	9.621	8.431	8.292	9.303	9.859	14.044	9.284	8.133	9.621	12.358	8.986	9.184	24.498
10.196	20.908	12.537	39.832	25.391
8.074	9.68	9.125	9.879	8.927	8.887	10.018	8.569	8.113	12.735	12.041	8.847	9.403	9.72	8.649	10.335	11.128	12.021	8.351	17.556	10.553	8.093	14.144	13.291	14.104	11.624	11.962
10.771	11.069	9.184	11.366	8.927	8.629	11.307	11.783	10.335	23.864	12.279	10.91	9.046	14.739	12.914	10.196	10.652	13.608	9.66	11.128	10.712	11.386	11.843	11.962	10.573	11.347	11.803	13.965	9.76	12.299	8.173	11.624	10.672	12.596	15.314	9.462	13.707	22.773	19.321	18.071	10.355	23.665	10.077	12.596	22.416	19.757	8.034	10.91	12.418
10.692	14.144	14.759	11.485	11.505	9.958	10.434	12.16	9.343	27.752	16.802	256.648	12.973	11.505	17.714	13.668	34.318	10.275	11.882	9.918	11.029	19.658
8.212	9.026	9.026	10.573	12.596	11.684	56.356	8.768	9.938	9.879	14.144	12.259	11.783	14.64	9.085	9.859	10.295	11.843	9.105	9.502
13.469	10.454	9.958	12.001	11.009	8.45	11.823	14.005
11.109	13.271	8.946	9.978	10.394	11.386	15.056	15.909	9.958	13.172	10.335	17.317	10.216	8.887	11.109	14.282	16.683	8.629	11.664	12.755	12.279	14.6	9.958	16.167	13.41	12.854	18.865	14.223	21.602	15.711	8.034	19.817	13.509	8.153	9.046	11.843	8.252
20.888	14.699	17.139	27.077	21.086	12.696	24.221	15.612	22.773	18.488	16.703	17.655	8.748	15.274	17.238	15.869	15.016	24.102	14.977	10.632	16.088	12.081	10.613	18.845	11.247	8.312	19.361	9.184	15.572	17.595	22.554	22.336	11.882	11.803	14.362	14.897	17.179	10.335	9.303	12.557	11.168	10.117	14.997	14.044	14.401	16.722	10.097	9.284	18.448	15.393
9.244	9.76	10.732	15.612	11.386	11.247	11.089	10.791	10.295	8.371	18.309	8.351	14.322	12.656	22.435	9.819	8.946	13.568	18.408	16.941	9.006	11.922	10.593	17.218	20.392	15.096	19.698	14.659	17.456	10.672	15.096	10.176	13.41
PLX
15.314	20.749	16.226	17.694	12.874	15.75	21.007	23.308	13.806	12.14	13.489	20.769	8.113	10.018	21.047	17.992	25.093	11.347	9.105	11.466	16.901	10.077	22.396	18.924	27.414
15.691	8.312	11.545	9.641	9.026	15.135	23.566	14.64	11.882	18.071	11.168	8.728	60.185	20.015	8.173	29.596	11.902	13.985	30.826	20.075	15.155	25.014	17.516	10.632	8.609	18.627	16.286	13.985	11.644	10.434	34.238	20.491	8.113	8.669	13.429	21.622	12.319	34.417	9.938	12.696	10.613	8.927	13.668	11.168	27.355	18.448	17.952	10.613	19.222	12.279
18.309	28.446	9.026	9.78	28.208	9.541	15.274	8.788	28.426	10.93
22.773	11.466	10.256	13.747
12.874	14.957	16.048	14.401	16.048	13.132	12.457	49.632	11.287	14.897	17.218	72.404	39.614	26.244	17.694	22.515	10.573	19.777	9.581	12.398
28.922	8.927	8.669	8.847	13.072	11.109	8.609	8.55	16.226	8.788	19.956	8.312	9.284	10.057	9.343	97.16	37.313	10.454	11.109	18.428	12.874	21.067	8.788	8.054	8.589	16.603	13.608	14.025
8.252	13.608	9.204	9.224
17.893	8.351	16.107	14.461	15.433	10.256	12.874	12.874	10.315	11.664	18.627	13.806	12.457	10.632	10.732	14.957	15.869	15.433	13.251	11.228	12.755	12.517	14.282	9.343	10.613	12.2	13.489	12.16	10.97	10.434	12.2	11.049	13.787	16.068	9.72	9.204	10.97	10.434	12.398	10.077	8.054	9.383	11.604	10.672	11.545	8.53	10.315	9.522	11.962	16.96
8.966	11.724	11.981	9.165	13.053	15.433	11.724	14.818	8.371	12.021	9.819	12.894	12.616	13.469	22.594
44.018	9.204	11.109	21.007	10.573	15.869	11.208	10.375	18.865	12.576	17.337	14.719	15.016	24.399	14.461	11.783	36.638	9.819	21.84	10.91	21.9	19.718	16.107	19.896	11.783	24.34	9.7	15.492	14.223	15.512	18.131	14.778	19.341	9.284	14.044	12.953	12.279	11.049	45.783
10.494	17.218	30.291	9.66	11.168	19.599	33.445	8.609	22.892	9.462	16.425	27.097	14.342	11.109	11.981	52.786	9.72	101.187	33.881	11.763	17.337	16.464	27.454	8.55	31.917	8.49	12.696	20.809	21.166	26.899	21.424	12.219	9.462	18.488	13.251	15.373	21.682	13.668	10.93	10.99	15.393	15.076	13.846	9.403	21.424	27.335	16.544	15.195	11.485	10.077
10.256	22.197	9.204	9.026	9.899	8.113	12.755	18.25	8.351	13.231	15.135	14.818	14.759	10.752	17.694	10.137	10.752	14.897	16.365	9.998	13.31	8.232	9.581	17.893	9.403	13.053	14.104	19.956	14.64	14.957	17.079	19.103	9.641	11.168	12.457	18.289	14.897	8.232	10.613	12.696	13.489	12.517	9.899	11.228	17.754	10.613	20.253	15.691	10.613	10.137
9.284	29.557	14.401	9.998	18.012	10.871	13.668	9.522	14.838	47.549	12.934	13.668	10.811	15.631	18.25	12.755	9.522	18.071	24.36	12.14	28.327	13.806	12.338	14.163	9.462	12.815	15.81	9.204	8.669	24.538	14.818	11.228	10.91	11.724	11.029
17.893	10.454	8.53	9.224	9.165	10.434	9.938	15.869	21.543	12.696	8.907	9.462	8.232	12.378	21.126	17.655	11.585	9.165	10.851	9.046	12.497	13.965	13.429	10.236	8.431	16.841	8.292	8.728	18.17	13.806	10.692	15.731	14.322	13.846	11.644	8.847	10.018	14.54	12.696	12.517
12.021	12.993	9.105
9.244	8.887	12.16	8.847	9.68	13.886	8.212	13.529	11.704	8.431	12.854	8.45	19.976	9.284	11.466	8.887	60.621	8.688	8.272	8.133	12.775	10.077	8.272	123.265	63.894	22.376	8.827	9.442	8.133	8.431	13.429	15.85	14.977	8.034	8.014	8.232	8.351	8.927	8.113	15.711	18.924	8.569	11.604	9.165	10.771	14.838	10.99	9.581	9.78	10.831
36.281	42.113	29.001	9.918	12.596	31.382	20.729	64.529	46.101	8.113
53.5	32.631	22.237	54.888	10.652	8.47	8.093	8.034	8.153	10.99	10.494	11.128	13.767	10.097	11.862	16.762	12.299	10.712	9.839	11.485	9.264	12.14	8.827	9.085	8.927	8.252	9.78	11.128	8.609	10.256	9.978	12.557	8.649	8.946	8.55	9.819	13.648	9.284	8.728	9.284	9.839	11.862	10.474	9.343	8.907	11.347	9.859	8.827	13.072	10.256
15.373	24.141	20.71	8.748	39.495	8.034	26.264	24.26	28.307	24.24	19.46	29.973	18.25	9.819	24.121	8.49	13.072	29.001	29.16	8.153	10.494	11.545	14.937	13.866	16.088	17.456	16.564	11.505	20.63	24.756	8.728	28.406	46.795	26.304	28.525	19.976	8.411	16.167	20.71	27.871	25.371	23.864	9.065	12.775	21.205	25.51	26.145
24.32	36.242	20.71	8.629	11.009	11.485	15.334	27.335	35.726	38.622	44.276	35.329
8.173	15.016	8.034	13.429	10.632	8.391	8.768	8.55	9.938	13.172	9.78	9.938	8.074	10.91	15.155	14.362	8.431	9.522	8.688	8.133	11.009	8.331	8.49	15.929	8.113	9.105	21.701	8.768	14.778	13.787	10.057	8.688	11.466	12.001	17.02	8.589	10.712	17.873	9.184	14.263	20.789	14.203	10.831	25.312	13.41	14.163	9.581	12.1	14.798	8.034
16.187	9.363	17.238	17.873	9.184	20.233	14.917	16.643	11.327	10.593	11.485	9.442
8.53	17.913
11.009	11.664	10.236	10.652	10.414	12.795	13.469	22.435	8.808	15.254	11.763	9.581	8.946	12.061	13.31	9.76	14.382	9.621	17.536	8.649	22.594	20.69	11.823	31.838	10.394	14.104	10.394	10.196	9.78	8.47	9.006	10.355	9.482	20.967	14.144	28.545	9.66	8.907	20.392	12.239	8.113	9.541	8.748	11.188	14.838	13.826	9.78	40.864	10.732	13.727
11.624	8.827	11.069	12.239	9.145	26.859	12.953	8.232	18.825	21.126	8.074	9.601	8.153	8.312	17.694	9.819	10.097	11.188	17.774	16.484	8.609	19.638	9.561	11.624	8.609	8.391	21.979	15.889	22.753	8.45	15.393	8.054	19.638	9.462	21.503	18.488	18.647	10.652	13.806	8.609	8.074	13.132	20.908	9.859	10.037	10.315	21.047	11.585	9.105	19.658
12.2	9.363	9.323	12.834	8.55	19.341	12.735	11.922
8.728	8.629	11.247	8.986	15.83	32.631	14.897	13.727	9.998	8.173	12.517	17.337	15.988	13.271	12.279	34.734	68.615	81.311	38.761	14.104	15.691	40.07	22.574	15.433	15.572	25.748	11.882	16.365	21.682	13.787	25.669	19.995	8.708	12.795	14.481	18.27	12.616	14.302	11.981	18.785	19.44	16.167	18.865	12.953	15.929	14.005	12.735	22.812	10.93	25.589
11.704	8.946	11.565	8.986	18.488	14.282	38.206	10.672	10.315	9.422	9.958	11.823	8.748	11.148	8.688	10.474	10.117	10.533	11.247	8.609
9.938	14.362	30.846	12.021	14.282	11.029	12.001	11.228	13.509	8.47	22.019	14.243	10.752	15.195	8.748	10.156	13.668	15.314	12.815	12.537	17.754	9.66	8.153	8.907	15.393	8.688	21.84	11.644	8.946	17.575	18.746	12.18	11.287	11.426	9.819	14.084	9.204	11.644	11.109	9.799	17.615	16.326	11.803	13.092	18.488	13.271	15.235	17.496	12.735	10.216
10.216	12.259	16.901	16.98	12.001	11.069	18.666	10.315	9.482	20.432	8.827	10.871	11.505	9.68	11.128	13.707	8.887	20.194	13.489	15.79	9.482	11.426	10.097	14.56	14.818	15.135	9.105	19.876	15.731	18.686	16.524	14.481	8.768	8.014	11.763	17.873	17.139	25.927	11.109	10.117	11.664	13.767	9.72	13.271	8.173	25.431	18.032	14.421	15.235	10.057
[truncated: 69 more columns]
