# Supplementary material for: Microglial depletion disrupts normal functional development of adult-born neurons in the olfactory bulb
Source: eLife. 2020 Mar 9;9:e50531. doi: 10.7554/eLife.50531 (PMC7062469; doi:10.7554/eLife.50531)
Supplement: Figure 7—source data 1. [file elife-50531-fig7-data1.xlsx]

## Sheet: Part C
Wallace et al.
Microglia depletion disrupts normal functional development of adult-born neurons in the olfactory bulb
Figure 7-source data 1
Each row is one dendrite and each column is the frequency of each sEPSC.
Control
10.5152	12.0048	15.3139	19.3424	5.9453	9.92063	7.62195	8.16993	6.65779	19.7239	19.084	52.9101	5.89971	28.9855	15.7978	196.078	15.083	76.9231	22.2222	21.4133	28.169	26.178	10.395	6.7659	20.6186	39.0625	9.78474	20.7039	13.4771	8.56898	45.4545	9.2081	16.4204	15.6495	53.1915	13.4771	25.8398	18.797	30.6748	28.0112	5.21376	10.582	23.2019	10.6952	333.333	13.0208	18.9753	56.4972	33.67	9.04977
0.924556	0.304312	0.370329	0.607386	0.597336	1.19005	0.141327	0.0289987	0.0645086	17.1821	0.093362	7.03235	0.841751	256.41	5.61167	1.66556	1.62813	200	1.42653	0.0832771	0.368786	0.420433	0.142584	5.58036	6.35728	0.315537	3.10366	1.95198	0.285665	8.26446	7.63942	2.0816	0.494535	1.87617	0.801732	14.1443	0.0170405	0.0170541
10.4932	5.41419	4.98008	3.87898	3.35233	14.5773	16.6113	21.5983	5.75374	17.6991	5.25762	6.91085	12.0337	21.0084	7.98085	4.87567	22.779	4.54339	5.40249	6.62252	12.6422	6.7659	21.7865	24.7525	7.26216	19.1205	196.078	6.56168	14.2857	11.976	5.80046	14.6413	12.6103	13.3333	6.76133	4.87329	5.96659	43.6681	5.04286	6.2383	3.80084	13.3511	61.7284	4.46229	4.76644	15.2439	15.6986	4.20698	6.87758	5.61482
2.85878	2.34137	1.09697	21.692	20.9205	15.5039	9.17431	22.8311	19.4553	4.68604	5.86854	22.6244	5.13875	20.79	10.101	12.5	5.14933	322.581	17.9533	6.9979	32.2581	1.84094	8.04505	13.4771	5.22466	7.39098	5.00751	18.2149	2.51193	0.95048	5.56483	2.66312	18.0505	8.38223	270.27	44.2478	15.7729	7.18391	7.47943	5.72738	13.0548	11.9474	9.2081	14.8368	22.0751	2.53807	3.10559	3.58166	2.04876	17.1527
20	27.7778	31.746	27.933	50.2513	25.7732	24.5098	20.9205	21.8341	12.3001	11.5075	256.41	11.4679	0.357974	19.802	55.8659	16.5563	27.8552	185.185	24.6305	16.5289	15.3846	20.4918	9.24214	33.557	1.63827	0.657333	0.79968	9.88142	0.56079	10.5708	20.2429	23.6407	0.184492	14.9925	58.1395	34.4828	27.3973	17.4216	15.3846	14.245	18.6916	57.1429	12.6263	22.0751	0.280348	16.0772	9.67118	11.2486	0.198287
7.53012	1.57233	4.55789	1.58328	11.2486	7.0373	4.98008	19.8807	11.5875	7.77605	13.0208	9.87167	25.5754	12.2249	12.4533	32.2581	29.1545	22.2717	32.3625	9.82318	6.29327	24.0964	9.19963	285.714	21.692	18.6916	21.1416	10.2041	15.015	2.57865	13.8313	9.32836	7.75194	6.74309	1.45285	2.40154	2.3175	3.0656	9.3633	5.47645	1.77274	6.15385	12.837	4.85673	27.933	322.581	33.4448	15.1976	8.00641	5.21376
2.83768	11.1857	4.75737	2.26603	11.7233	21.8341	2.64271	4.42282	0.586786	11.236	12.8866	14.8588	4.2337	1.74004	6.035	10.4058	2.29779	18.7266	1.57754	32.5733	5.67215	53.4759	7.02247	6.17665	14.245	6.48929	4.4405	11.6822	5.85823	9.68054	13.2802	109.89	13.4048	80.6452	30.7692	9.72763	89.2857	5.69801	3.36814	1.95656	1.40252	32.0513	4.30108	4.52489	14.3885	6.08273	2.29568	1.48017	21.0084	17.7305
1.15875	4.64253	1.05519	136.986	0.958589	8.23045	16.2602	1.86672	4.1806	0.993739	31.1526	2.38607	2.75482	2.23864	18.8679	1.39528	3.9604	2.54907	2.5974	18.4162	1.52184	5.98802	1.76243	9.19963	12.4533	3.96983	12.6582	2.05973	5.95948	2.2119	6.57462	11.0375	12.6904	0.931446	13.4771	3.98724	2.34247	9.92063	1.36874	2.20848	200	4.98504	3.04971	21.097	3.99042	1.03306	333.333	6.93481	21.1416	13.2275
33.7838	4.14422	10.7181	45.2489	72.4638	13.6799	28.3286	9.77517	10.0604	73.5294	81.3008	222.222	34.7222	13.1062	36.7647	31.8471	19.6078	23.6407	21.5983	303.03	56.4972	13.1579	18.0832	23.9808	14.5773	16.0514	11.7925	14.7275	21.5517	23.5294	217.391	51.2821	333.333	107.527	29.1545	22.8833	112.36	14.2248	15.7729	5.37057	8.20345	39.0625	16.5837	42.5532	15.0376	18.9394	23.6407	8.2713	322.581	6.7981
3.11818	32.5733	3.00842	217.391	8.74891	5.67859	5.04286	4.53104	30.6748	12.4844	3.8835	1.57456	227.273	6.71592	31.4465	26.455	7.84314	22.6244	8.25083	20.0401	11.6686	10.1215	2.18245	11.4679	10.2249	24.57	16.4204	181.818	20.9644	20.8768	238.095	17.3611	17.6367	27.248	12.3457	29.6736	31.1526	30.03	30.03	22.5734	16.3399	33.4448	12.0192	23.0415	25.1889	277.778	38.9105	151.515	15.6006	19.2308
54.9451	27.5482	285.714	8.00641	20.79	18.2815	5.35332	5.88582	20.8768	3.88651	3.3389	4.41306	4.21408	6.77507	10.395	58.8235	14.245	17.4825	2.30203	38.1679	7.79423	19.6464	5.44366	3.13775	6.38162	22.9358	18.9753	33.8983	238.095	38.0228	46.729	21.1416	222.222	33.67	36.1011	46.2963	200	36.7647	25.5102	19.084	204.082	111.111	33.1126	39.0625	13.1062	14.771	99.0099	26.6667	48.0769	34.8432
1.15955	4.3535	0.325489	0.325288	0.693529	0.489428	0.285071	5.9453	0.296121	0.397014	0.354635	1.18652	1.89036	0.252379	6.50618	25.0627	0.402722	1.09769	0.374195	2.70929	1.53681	1.04504	1.61786	3.15358	4.65549	222.222	0.272584	0.458211	1.84468	2.58665	2.76396	1.22926	0.994233	0.651508	0.819403	1.76305	151.515	4.93097	0.358925	5.41419	6.2422	0.53285	21.1864	0.445117	2.55167	24.8139	1.55788	1.59084	0.806322	1.36054
0.723798	0.394073	0.453432	1.33191	0.250954	0.207194	1.06394	1.02501	0.644454	0.660633	2.23065	0.261233	0.678794	0.68738	3.9185	222.222	9.87167	3.28299	3.15756	0.430311	0.230984	2.01857	2.62467	2.60824	0.66912	1.51355	4.31779	1.20409	303.03	1.83959	3.30251	30.2115	285.714	0.65505	0.313588	2.72628	3.99202	1.25266	0.331268	3.49895	6.17665	13.7552	3.0003	25.3807	322.581	7.19424	23.2558	2.34357	0.149211	1.77904
0.599844	2.47831	1.01636	0.204977	0.149573	2.63158	0.394042	7.00771	0.508233	1.20351	256.41	0.618276	0.806517	0.378258	1.638	333.333	0.553802	1.31062	2.46305	2.58131	4.329	7.75194	6.43087	0.988826	0.557693	0.134975	0.911826	0.391236	15.456	1.82949	0.29769	6.90608	1.4247	1.61394	3.50263	0.672585	22.2717	126.582	29.0698	26.178	63.2911	5.33049	8.726	20.8333	18.5529	163.934	8.74126	14.43	8.82613	0.589345
3.17864	0.794723	2.0284	238.095	4.13394	36.4964	0.397362	5.53097	6.40615	1.04058	1.09951	1.21847	1.33014	8.01282	9.33707	7.10227	9.54198	4.38212	21.3675	2.39234	7.66871	1.43947	0.745434	1.84877	47.1698	1.45096	1.57431	2.89855	1.53965	0.85918	333.333	0.296903	0.537346	3.79363	10.9529	5.18135	1.41084	11.7096	1.4652	16.1812	1.00675	0.875044	15.5039	10	0.534102	3.96983	2.31535	196.078	40.8163	33.0033
6.71141	250	1.03799	0.133829	312.5	0.239992	0.687332	0.846812	0.288085	2.30309	5.86166	2.28363	256.41	0.938703	0.526815	0.100686	0.251623	181.818	0.0988611	129.87	0.117852	270.27	0.294421	312.5	0.273015	0.22203	0.112714	2.05212	0.49099	0.222692	1.24828	0.612257	0.259632	1.08613	0.229737	0.180509	1.2655	0.740028	0.30626	3.09502	0.39496	303.03	0.487234	1.04526	0.135128	0.80795	0.205132	0.830151	0.0782515	0.448209
0.83654	0.173977	158.73	2.1322	0.7494	2.44858	0.149466	0.255611	0.418025	0.119603	0.969368	6.47249	0.325659	2.69687	0.941442	3.08737	0.767224	23.2558	0.94402	1.52882	14.556	0.372148	0.859919	0.266766	0.170439	0.120322	0.215615	2.24115	0.190299	0.842105	1.04275	0.599556	0.118408	0.521975	11.1359	0.458505	1.37836	1.41223	1.15088	1.10754	9.38086	11.976	7.39645	1.88182	1.58907	1.58604	1.50195	2.92826	2.52334	0.208598
5.62746	5.78035	0.0372876	0.64189	0.455228	0.188533	0.0490725	1.06644	0.232072	0.261151	2.12359	0.299688	0.0662651	0.0349382	0.74549	3.38409	2.65322	0.20439	1.95427	2.39349	0.178811	0.741125	0.613497	0.181557	0.365203	0.462364	0.768994	0.39093	0.245646	0.605473	0.30738	3.92619	0.208411	2.69469	0.34031	0.177513	263.158	0.762311	0.16452	5.89623	10.4822	8.66551	7.74593	8.55432	0.531463	8.53971	169.492	1.35796	0.191362	0.178155
1.84843	1.6742	3.14465	5.16529	5.68182	0.70492	1.35026	0.94402	0.82481	10.3199	11.6144	4.27168	2.02429	9.65251	0.706015	9.12409	3.73692	2.28467	14.5349	3.22581	0.98912	6.12745	0.904241	0.916086	3.05998	8.19001	1.84298	1.14416	0.403991	5.69476	0.315199	4.14079	4.04858	1.15607	4.43853	7.90514	238.095	1.12867	10.1626	25.1889	8.46024	13.6612	2.62605	18.7617	14.881	17.1233	10.3093	12.8866	9.00901	7.1736
0.0967586	312.5	0.41792	1.51791	3.61272	0.0551959	0.422851	4.50045	0.157681	0.0679043	0.571755	1.88076	208.333	0.880514	0.458169	15.4083	11.2994	1.85529	2.14684	21.1864	0.536107	5.34474	0.138881	4.13736	16.3666	1.60077	208.333	0.145569	15.456	2.73224	6.04961	2.69542	0.926441	9.68054	285.714	0.838293	27.7778	2.71223	0.344376	2.08203	1.14025	0.195023	0.118113	0.312441	0.128447	217.391	0.0799898	0.339501	1.39899	0.481093
0.129703	0.401542	0.0886258	2.17817	2.3596	0.834376	0.0457819	0.251345	0.0703314	0.866176	0.281912	0.822233	0.270387	0.0811412	1.10254	0.188037	0.0835953	0.0646429	0.491183	0.141171	5.04541	0.165199	0.100838	0.0499281	0.0954973	0.0508231	0.442635	0.370178	0.109087	0.0500831	0.0308715	0.886839	333.333	0.392634	0.374	0.0842801	0.0454837	0.268702	144.928
38.9105	0.231884	0.362253	2.82805	0.536913	6.7659	2.0028	0.417084	0.221156	0.377929	0.28512	0.543596	0.16031	294.118	0.798212	4.22654	1.34156	1.56128	0.910415	1.70853	0.186071	1.77557	0.556824	1.65317	2.04457	12.7877	3.71333	0.631951	0.359066	0.085076	263.158	1.36407	1.57654	0.413121	0.253917	0.368161	1.2663	0.383789	1.23381	0.254311	0.128606	0.347923	0.19056	0.169368	1.27763	0.13071	1.67001	0.254693	0.490942	0.400449
0.874508	2.08638	0.983284	0.532992	5.07614	185.185	4.33088	0.298623	1.65207	1.01667	2.13584	1.01802	3.63901	3.24149	0.17485	222.222	1.62206	1.05652	2.9656	0.235189	0.359144	0.471921	1.77368	0.902364	4.78469	0.489452	0.819605	0.79321	7.26744	3.30579	0.497958	1.54919	1.6488	0.566926	0.289377	208.333	7.19942	0.798276	0.38555	0.328764	0.113051	0.190411	0.209996	0.385297	1.27097	1.78571	0.243398	4.0016	0.671186	0.0844081
PLX
8.77193	1.9044	4.96524	5.71102	2.66312	1.23503	1.91828	6.22278	1.9976	0.795862	1.41503	3.64166	1.10742	2.13538	4.63822	4.82625	0.588305	1.98177	5.8309	2.90444	3.42466	5.92768	2.39578	6.49773	2.37925	1.28189	5.37346	7.77605	4.07664	1.46199	7.10227	0.555124	3.30688	1.20048	1.03466	13.3333	32.2581	24.6305	2.18198	1.96696	3.96511	4.4287	4.03877	4.25713	0.457875	0.561356	23.0415	2.86862	1.86916	0.503449
7.62195	4.90196	0.448229	2.35571	0.502866	0.56035	1.37665	1.2207	3.34225	2.05381	1.00806	0.346741	4.11184	0.736648	1.98295	0.6749	4.00641	0.833056	1.0591	28.169	0.844167	0.885818	2.20556	3.367	3.34225	333.333	0.249644	3.64299	1.97394	1.00705	9.40734	1.97394	1.15009	1.74216	3.52858	2.85633	8.55432	0.301014	0.359997	1.34336	2.40616	3.29272	1.39392	0.941265	2.02963	2.50878	0.935804	3.40716	12.8205	5.23013
1.00685	3.09023	1.4374	3.10463	2.01491	5.45554	0.214915	0.0897175	51.5464	2.85878	2.56871	1.24704	0.646204	48.7805	8.38926	1.33797	0.652443	1.34102	4.71921	1.1334	1.02997	6.82128	8.05153	1.49187	1.62417	1.78955	2.71076	277.778	17.762	1.3574	0.251674	0.343867	0.207646	0.443066	0.222544	0.704275	0.73888	0.474834	1.5186	0.56773	0.274341	2.42777	6.99301	1.04037	12.4378	8.80282	7.83699	14.43	0.805802	1.13701
1.972	23.2558	3.82702	3.77929	212.766	3.30797	10.1729	9.72763	28.7356	3.22789	2.2237	1.37571	9.53289	7.95545	11.6144	54.3478	4.68604	12.837	1.83891	0.776036	8.20345	10.1626	29.1545	13.1579	12.1803	19.3424	5.50964	303.03	8.52515	0.503221	0.670286	2.36742	38.61	3.99361	5.50964	6.26566	17.6991	4.83092	15.456	1.76056	15.0602	1.87512	1.37043	1.09757	2.035	13.2802	196.078	1.08319	13.1234	30.581
6.84463	4.14594	6.83995	16.1031	3.65631	8.07103	2.56476	3.01205	3.38066	10.101	285.714	26.6667	8.58369	1.28932	3.125	4.92854	3.25627	1.61134	0.382088	1.04712	4.11692	3.52609	0.797003	1.10241	1.40509	9.31099	3.52734	256.41	4.28082	3.48797	3.3456	1.9604	18.1488	8.7108	13.4953	200	8.14996	5.96659	19.8413	2.76243	2.15193	4.24809	5.10725	1.9658	32.3625	4.33088	1.38198	6.16523	2.08855	0.975229
0.77226	2.2686	1.1558	2.41955	3.33	17.5439	2.13995	6.77966	9.86193	1.09349	2.24618	0.89214	5.33903	2.34302	11.274	2.43962	18.7617	1.98138	0.432788	1.63908	5.10725	1.26088	22.4719	0.667022	1.51745	10.6952	5.62114	1.66306	15.015	14.9477	2.96121	2.42777	3.73552	1.48302	2.75255	24.7525	3.90016	2.71961	5.29661	28.3286	20.9205	185.185	2.86862	3.75657	48.3092	1.20511	13.9276	14.2248	3.2041	14.5138
0.691994	0.843739	1.96967	0.67595	6.81663	1.15674	1.21095	4.47227	0.716743	1.153	2.43487	10.7181	19.0114	204.082	2.51067	4.13394	0.634075	23.4742	2.79096	0.99681	303.03	0.547435	3.78215	2.59875	1.40746	1.12322	1.05552	2.67809	0.719994	2.87356	17.7305	6.13121	2.99401	3.55492	3.0303	196.078	0.792519	1.19119	3.53232	303.03	1.79921	2.98686	0.920217	0.945448	15.2439	2.86615	0.488639	38.1679	3.69686	0.964041
1.68407	222.222	5.70451	16.3934	6.80272	3.36587	9.00901	4.36491	20.1613	20.4082	6.52742	6.77966	22.3214	7.76398	7.16846	32.0513	9.7561	7.33138	208.333	3.0248	7.25163	2.61986	1.84026	3.82555	232.558	5.85823	31.1526	12.1507	1.11297	2.15843	8.54701	0.640082	1.86532	7.78816	0.834098	1.45921	1.90767	2.05339	21.1864	46.5116	1.22041	1.43164	10.8814	3.57782	10.7759	1.72951	322.581	21.7865	13.0548	1.34971
5.98444	3.6036	1.84706	1.12943	18.797	4.48029	1.51378	2.95508	21.8341	232.558	1.83184	3.67647	39.5257	1.15181	1.72503	1.99283	4.07498	20.6612	7.76398	2.14915	0.784991	8.65801	4.42478	1.83621	5.19751	3.50385	8.96057	9.47867	4.12712	6.41849	7.08717	0.953016	256.41	0.536021	0.390274	2.48942	1.93986	19.3798	30.4878	11.325	2.47893	3.01568	1.0609	4.26439	6.035	9.46074	1.86741	13.6426	4.98008	0.93006
6.44745	6.89655	21.8341	15.1286	151.515	40	68.9655	16.6945	19.3798	59.5238	31.6456	9.61538	66.6667	59.8802	144.928	21.7391	47.3934	35.3357	208.333	12.0919	18.622	14.1643	263.158	15.3846	227.273	10.4384	72.4638	256.41	22.6244	16.835	76.9231	19.4932	192.308	53.1915	256.41	4.84027	227.273	13.2802	68.4932	5.69801	175.439	8.96057	27.8552	13.6612	14.8368	105.263	28.4091	227.273	13.6426	18.8679
16.7224	16.7785	13.369	10.1215	1.99084	1.03348	2.12404	12.6743	8.92061	2.92312	5.96303	10.4384	1.98886	2.76091	16.129	3.15457	0.861104	1.02501	2.78629	1.22549	0.796559	8.82613	2.25989	0.786349	0.453494	15.625	0.957854	2.22767	1.57928	0.736974	4.39947	6.49351	2.16779	0.802439	2.47893	0.406009	1.31251	5.31915	0.412337	11.7925	1.74095	3.75657	9.27644	2.54712	12.7389	7.87402	1.01235	0.83626	1.1334	2.90107
6.72043	1.42735	25.641	3.20307	27.1739	1.16577	1.88608	7.80031	172.414	18.7266	13.4771	19.4553	31.348	7.97448	8.98473	6.21118	25.1256	5.3135	16.6389	27.7778	11.0619	6.36132	9.11577	20.4499	7.01262	10.989	14.771	7.89889	6.79348	12.0627	7.72201	11.534	11.5875	12.5945	42.735	31.6456	15.3846	21.2766	32.5733	18.9394	19.1939	26.5957	7.10732	10.7643	19.2678	39.3701	28.9017	18.018	21.2766	18.1159
35.5872	277.778	15.7729	153.846	19.802	11.1607	4.25532	250	6.2383	9.32836	113.636	11.919	22.2222	30.303	15.8228	16.1812	256.41	31.746	8.22368	4.41891	2.12902	277.778	7.46826	26.9542	12.837	26.8097	26.8817	10.5263	39.8406	18.9394	6.89655	23.8663	28.9017	217.391	5.35906	3.53857	4.04204	13.089	19.3798	5.38213	17.2414	10.4384	9.97009	24.4499	63.6943	35.2113	6.60502	13.4409	13.5685	28.6533
7.22022	27.8552	6.22665	11.6009	238.095	17.5747	2.50125	4.39367	4.20521	4.91884	303.03	9.7371	23.4192	13.4048	10.1112	5.8309	277.778	14.7059	7.84929	6.90608	11.4811	16.2338	113.636	10.7759	14.0845	232.558	4.7081	9.59693	16.4204	18.5874	13.2275	34.0136	232.558	34.4828	7.76398	14.3678	30.1205	6.05694	9.9108	49.505	3.4904	4.20345	5.12033	28.0112	4.56413	16.8067	5.18135	6.25391	1.95733	31.25
2.53165	2.71297	1.28883	4.19992	312.5	4.12541	5.58659	27.027	2.14915	1.13843	13.1406	2.91545	3.60881	6.48508	1.88929	10.7296	52.356	20.4499	17.2414	10.9529	6.51042	2.44439	2.57268	4.60617	4.41891	9.31966	200	4.08163	10.4493	16.6667	16	3.69413	7.53012	5.7971	3.13775	18.4162	10.2987	16.5563	178.571	13.5135	0.981258	2.57202	6.02047	6.40615	17.2712	303.03	2.24366	2.71739	15.949	9.74659
9.67118	4.01929	9.60615	41.1523	21.0526	30.8642	232.558	6.81199	25.2525	13.7174	26.455	74.0741	6.77507	6.29723	15.083	10.2459	11.0254	18.6567	8.93655	20.8768	14.2857	14.9477	35.0877	196.078	4.02091	3.67647	7.82473	28.9855	6.34518	12.4224	15.748	20.9205	11.3379	6.2383	11.7925	232.558	11.4025	9.07441	80	35.5872	208.333	5.50055	17.2712	23.753	18.3486	35.461	6.60939	1.43947	27.7008	3.57526
5.29381	29.4118	26.1097	322.581	2.70051	1.80963	1.15727	2.01005	2.21141	6.74309	5.61167	14.1044	1.81818	0.890631	2.18531	5.28541	3.30251	1.56446	1.99561	5.15464	161.29	17.9856	312.5	2.63644	1.03853	3.85802	3.39328	2.29516	40.1606	0.311449	4.84262	5.26316	3.12207	21.5983	13.8504	1.30259	39.2157	5.36481	222.222	1.17689	4.43656	312.5	3.89408	14.0449	10.2145	1.35318	192.308	0.928419	9.6432	7.6864
9.04977	3.10849	9.8912	2.3218	5.72082	7.5188	185.185	12.8866	3.36587	7.28332	1.79921	5.18941	1.37212	1.1711	2.56674	9.65251	8.87311	2.66951	294.118	3.01477	2.05465	2.17628	8.79507	0.785669	1.87301	2.10393	2.87936	7.05219	24.0964	15.0602	6.88705	10.8578	11.6279	7.5643	103.093	322.581	2.17297	7.42942	3.13873	6.60066	1.12296	2.12993	5.61798	1.98373	1.12676	35.7143	12.1359	60.241	3.4118	17.2712
1.66917	1.07089	1.73883	9.80392	3.61533	0.361677	0.402463	4.11015	0.732225	2.61028	2.09732	14.2248	13.4953	1.3574	2.02593	2.96209	9.51475	11.2994	3.81534	20.4499	2.145	5.89971	1.77399	15.2207	1.15327	20.6612	2.87109	2.66454	4.23012	3.10752	3.93391	2.7571	8.65052	34.4828	24.6305	322.581	5.87889	2.82805	4.28633	0.586923	2.1363	1.46585	0.865726	2.59403	5.86166	4.06009	1.48655	2.95596	1.53468	2.08117
10.6496	9.31966	1.6116	277.778	3.31016	9.34579	312.5	3.20205	5.16262	6.7659	16.3666	285.714	1.08589	9.60615	6.38978	24.7525	3.25309	5.08388	10.2145	22.6757	8.45309	5.64334	3.26691	5.81395	3.74953	1.9044	3.21234	12.9032	31.1526	3.56125	4.47027	175.439	30.3951	14.556	2.39063	158.73	8.90472	29.8507	15.1286	2.06868	7.44048	5.92417	5.85823	3.01114	1.58353	2.98686	5.13611	285.714	5.22193	15.7233
3.56761	4.94315	5.10204	7.96178	5.44662	15.2672	10.5708	2.75786	2.09512	13.1579	16.3666	29.4985	27.7778	14.2653	9.83284	9.82318	14.245	1.96657	1.28205	3.4459	7.49625	5.95593	3.81971	15.7729	3.82117	16.1812	9.81354	7.86782	9.47867	14.4092	42.5532	25.974	31.25	15.3846	64.9351	2.96472	5.03525	7.50188	11.8483	5.02008	7.36377	7.0028	8.70322	6.5445	18.0832	5.57414	6.00962	4.71254	3.39098	12.0482
7.28332	15.2439	8.56164	7.12251	13.8504	6.15006	2.98954	7.84314	178.571	29.7619	3.37041	217.391	24.4499	6.93963	6.9541	9.62464	5.06329	4.23012	196.078	8.51789	81.3008	25.3807	2.97885	26.0417	6.09385	5.42888	26.2467	13.3869	9.67118	7.59878	24.6305	15.5039	16.5563	312.5	11.4811	48.7805	3.68053	5.02765	7.65697	7.72201	10.2249	10.9409	9.26784	121.951	14.5138	31.0559	7.30994	29.1545	17.0068	14.9031
8.10373	20.5339	2.41604	4.53104	10.352	17.9533	16.7224	20.6612	14.0845	12.8866	2.19539	2.36295	6.86813	19.2308	25.8398	5.49753	38.3142	4.65116	9.4162	5.92768	15.674	11.3379	34.0136	32.4675	7.0922	37.037	13.7552	9.47867	40.3226	36.7647	243.902	23.753	33.8983	5.02765	11.2108	20.8333	3.92157	30.03	13.3156	29.6736	30.581	24.1546	22.779	15.5039	12.1655	12.3457	15.1745	15.625	30.581	1.62549
1.09146	15.4799	12.5786	12.87	6.69344	1.8498	30.3951	1.11074	2.13447	1.90078	6.59631	1.54226	1.9658	1.16158	7.36377	1.12133	9.3633	0.758668	13.6986	0.87581	0.984349	2.63296	4.21763	3.31016	1.95008	2.6688	0.746213	2.08247	26.1097	1.67813	2.30203	1.03231	50	9.61538	0.367728	11.9474	2.94898	1.23001	1.69578	208.333	2.20556	1.703	9.96016	4.18235	1.09421	14.5773	0.620655	1.38141	10.8578	26.5252
6.9541	6.28141	8.68056	30.2115	12.6422	9.80392	1.66583	1.4374	0.931185	3.28947	2.94551	2.22717	26.8097	4.98504	4.48029	11.9617	14.0845	3.4626	10.6496	35.0877	270.27	4.45038	35.5872	6.83527	6.86342	2.44141	3.82409	2.94898	8	9.33707	7.66871	28.169	7.35294	21.8341	84.0336	26.178	3.54988	0.95057	12.2399	4.55373	3.13087	2.66596	15.3846	4.90436	11.976	15.1057	4.06009	238.095	1.90331	4.07498
0.522302	3.39905	4.97265	7.00771	1.00806	0.2931	1.50083	35.9712	14.5349	4.29369	7.87402	15.2905	8.80282	23.9234	20.0401	3.95726	3.29272	19.0114	3.02939	3.45662	2.574	2.89268	4.12712	1.5425	0.809717	46.2963	35.5872	4.26985	39.0625	2.0982	7.19942	22.8833	0.932314	35.461	34.4828	25.9067	9.14077	11.534	7.07714	3.02024	3.71885	19.9203	21.1416	27.6243	11.1111	15.456	10.3306	2.56082	19.2678	12.837
38.0228	10.4384	15.528	4.17014	2.70197	1.25992	12.1212	3.33111	6.62252	8.88099	2.40385	5.15464	15.8228	2.1173	204.082	13.0208	9.47867	3.43643	1.38351	12.0337	7.74593	2.55689	4.49035	3.22893	2.97885	10.0908	6.42674	1.83217	2.8777	1.42572	1.1147	263.158	13.986	2.89017	4.00481	6.99301	2.50878	5.38213	28.5714	3.37268	4.10846	5.84454	1.00634	312.5	2.96384	18.9036	3.77358	3.26904	1.54967	15.456
[truncated: 4,992 more columns]

## Sheet: Part D
Wallace et al.
Microglia depletion disrupts normal functional development of adult-born neurons in the olfactory bulb
Figure 7-source data 1
Each row is one dendrite and each column is the amplitude of each sEPSC.
Control
9.561	18.964	10.692	6.705	13.41	10.097	8.45	8.431	6.804	8.649	12.973	13.707	13.211	7.419	7.221	5.534	5.991	13.132	8.47	12.319	6.249	12.358	13.707	7.181	11.664	9.403	13.211	8.609	6.943	8.748	12.021	7.836	8.907	7.379	9.581	7.736	15.969	7.32	8.827	8.292	8.312	5.832	7.895	13.33	13.172	7.379	6.149	12.398	12.12	5.713
5.118	5.554	5.058	5.019	5.515	5.435	6.03	5.495	9.899	5.257	6.487	8.153	5.396	5.951	7.379	6.308	5.177	5.158	5.495	6.903	6.07	5.336	5.475	5.316	6.943	5.852	8.827	5.058	7.042	6.586	5.396	6.725	6.387	5.634	5.673	5.237	5.594	14.421
5.078	110.59	14.897	11.228	15.116	6.606	104.52	8.411	9.244	5.177	15.096	9.085	10.394	5.257	14.421	9.541	48.898	10.236	11.049	118.267	10.275	7.558	5.376	11.009	5.316	15.413	14.54	5.118	5.296	5.475	13.509	5.455	5.336	5.812	5.336	9.522	8.113	9.581	10.434	6.983	6.883	16.008	155.222	10.791	5.435	11.386	10.99	9.383	10.632	9.68
5.733	8.371	7.955	6.11	7.042	9.204	6.13	8.788	6.447	9.502	9.244	11.089	6.784	7.836	17.794	5.515	8.569	6.963	24.26	5.733	6.407	9.422	6.368	11.228	11.089	8.133	5.792	6.685	8.411	18.25	7.221	7.26	6.923	11.981	6.249	10.176	5.713	7.498	7.062	8.768	7.062	5.257	5.792	9.601	5.614	7.716	6.506	6.764	6.447	5.039
19.261	21.662	21.86	26.7	31.223	46.319	34.893	27.236	28.069	11.505	19.995	10.771	22.654	6.725	28.585	28.704	16.445	33.425	17.595	19.361	25.629	9.998	8.768	16.048	12.934	7.082	13.886	17.694	26.304	5.673	20.154	20.472	6.487	10.573	9.641	18.309	24.439	7.736	10.533	20.551	8.708	10.553	17.218	12.041	15.592	15.016	38.325	15.949	9.938	12.517
16.226	12.953	10.831	5.574	8.093	5.118	5.158	6.387	7.002	12.14	18.805	9.343	7.062	10.871	10.533	6.824	6.05	5.058	11.128	6.467	10.871	7.24	10.91	10.414	16.345	15.552	5.078	7.796	6.506	9.303	7.042	11.525	8.133	12.358	12.398	7.855	5.534	6.09	5.078	10.394	5.435	10.037	7.102	6.744	6.566	9.343	10.057	10.236	6.844	8.312
8.431	6.625	6.268	6.288	5.634	7.062	5.634	10.256	10.335	14.64	13.053	5.554	9.145	14.382	5.039	12.636	12.735	7.062	10.533	7.102	6.606	9.105	7.597	7.359	8.034	7.24	6.387	7.221	6.883	8.55	5.257	5.098	7.518	11.585	11.267	5.574	10.275	8.074	10.176	10.95	12.259	5.515	5.138	6.07	5.296	5.098	10.117	7.459	14.58	8.708
8.887	5.832	6.209	7.597	6.645	5.415	5.534	7.26	6.983	5.475	5.772	6.209	6.705	5.475	5.872	18.309	13.271	5.475	7.558	12.953	6.268	9.7	10.851	20.154	5.415	13.191	5.277	5.058	8.847	15.77	8.669	6.427	5.594	5.812	17.734	5.475	5.158	7.697	12.299	20.789	7.677	5.792	17.258	5.892	22.614	7.478	5.693	20.829	7.716	5.376
6.506	7.002	15.354	17.794	17.813	6.923	9.244	7.657	9.383	19.857	11.267	9.601	6.526	5.158	17.377	5.971	5.158	21.761	6.487	5.455	28.069	18.19	6.725	9.581	22.336	6.268	26.204	6.249	5.554	7.955	11.525	18.805	15.572	11.307	9.839	5.515	5.951	5.634	12.081	5.019	5.356	9.978	5.931	11.406	5.237	32.631	18.666	12.2	9.046	6.447
5.158	6.764	11.347	12.636	31.997	36.996	45.466	11.565	8.113	6.368	5.792	14.6	16.603	7.578	16.623	7.915	38.285	32.274	61.434	17.774	45.287	15.988	8.45	6.784	10.275	19.261	5.812	10.851	14.56	10.137	14.005	13.965	10.156	37.273	10.117	7.121	8.728	6.864	12.517	16.623	15.215	15.711	23.268	83.096	8.748	19.579	19.658	18.408	7.617	29.339
13.112	8.609	8.351	12.854	9.68	35.587	7.597	6.011	16.306	6.705	19.004	7.042	21.245	15.631	7.935	10.89	16.167	11.029	18.666	15.79	16.345	7.181	10.474	27.97	8.411	9.264	7.578	19.658	36.48	12.537	10.89	25.292	27.732	13.449	9.859	16.802	11.704	5.574	25.51	7.379	14.739	41.578	22.792	34.04	18.865	7.26	43.304	15.413	18.924	15.453
5.812	5.277	6.249	5.039	6.923	5.554	5.098	5.257	5.971	5.634	5.713	5.693	5.892	6.149	5.515	7.082	12.061	7.201	5.832	5.376	5.554	6.13	6.11	6.03	14.441	11.505	8.034	5.971	5.832	5.872	5.415	5.852	5.316	6.407	12.934	6.11	5.237	5.991	6.487	6.705	5.376	6.09	6.13	5.257	5.316	5.336	5.554	6.427	5.237	5.396
17.575	6.744	19.619	11.862	5.971	35.369	7.28	18.825	14.163	16.187	16.802	6.844	5.812	5.534	11.406	8.193	5.098	5.376	9.978	16.008	22.316	15.155	6.645	14.759	5.257	23.149	6.943	15.334	10.077	5.951	9.72	6.348	5.257	26.125	7.478	6.804	12.953	25.451	7.558	15.869	8.867	6.308	9.68	10.494	6.943	6.506	5.554	9.68	28.446	10.513
6.308	33.921	7.24	29.12	5.971	10.335	5.078	22.713	5.177	9.006	7.816	22.237	5.892	5.673	6.883	6.546	5.118	9.66	6.903	6.606	6.864	7.935	8.312	6.526	5.296	6.506	30.469	36.519	7.637	9.68	7.875	6.665	7.181	8.748	6.387	12.557	9.958	8.113	6.467	7.796	10.533	9.383	6.903	8.351	7.597	11.505	8.669	7.26	5.951	5.336
5.534	7.34	10.236	9.502	7.538	5.554	7.459	5.673	5.058	8.649	23.407	9.323	5.832	9.303	7.836	7.121	5.931	7.836	8.034	11.604	6.824	16.306	7.022	9.938	8.45	5.277	5.673	18.746	42.49	19.777	9.958	11.049	7.359	6.387	30.39	6.209	9.641	30.549	5.653	5.971	7.26	17.833	10.831	14.005	19.361	6.883	5.396	6.963	9.204	10.236
7.498	6.03	11.942	7.974	7.201	10.097	5.713	5.237	8.133	5.197	6.824	7.459	5.058	6.725	7.498	6.03	12.993	5.733	5.534	5.931	6.169	7.379	7.201	7.478	8.034	5.336	11.962	5.693	19.38	7.181	7.379	7.518	6.844	6.149	5.118	6.447	8.272	5.812	10.831	28.724	5.693	5.733	6.625	9.006	10.533	5.991	6.387	7.379	20.928	5.772
5.653	5.931	6.09	10.474	6.665	6.09	5.336	6.011	5.316	25.689	9.442	5.158	6.625	5.772	6.824	5.396	8.133	6.288	6.05	5.872	5.832	19.301	10.632	5.415	8.054	6.229	13.767	10.712	8.629	7.498	6.387	5.138	5.753	8.034	5.911	6.705	7.221	5.396	7.657	7.518	5.832	7.042	7.24	7.359	7.161	6.487	6.249	5.832	8.034	5.019
6.229	8.093	18.706	7.24	83.235	17.476	5.753	8.411	10.791	8.708	21.027	8.193	7.915	7.955	12.517	10.494	7.776	5.316	9.343	5.634	8.074	6.189	6.645	5.614	6.606	18.25	10.037	6.546	16.326	5.554	19.896	8.312	11.981	7.597	6.606	5.257	5.475	8.847	14.163	17.754	12.358	11.168	13.727	11.704	15.076	18.964	5.197	6.288	8.153	5.753
34.754	32.81	9.879	14.124	7.439	6.705	5.693	7.34	6.328	6.744	6.09	6.07	18.468	16.326	14.56	6.288	12.576	5.158	5.911	7.518	7.597	15.81	8.074	7.558	19.063	11.624	7.002	8.074	6.883	7.836	5.772	19.48	37.968	11.505	6.824	5.713	5.396	16.127	40.903	15.81	22.733	90.158	5.118	46.676	49.77	66.929	38.265	59.074	44.95	54.551
21.602	10.156	11.009	12.894	5.772	13.509	15.79	16.464	17.06	12.477	10.077	9.66	10.771	5.296	6.883	6.566	7.478	5.673	5.574	6.566	7.617	9.74	12.418	17.556	5.594	6.07	5.098	11.843	10.553	9.502	7.181	12.1	5.415	10.91	8.688	8.55	5.852	7.28	11.922	10.097	10.533	5.177	5.713	8.232	7.161	7.419	9.76	16.048	12.934	6.169
6.209	12.696	7.716	5.078	5.118	5.118	16.008	10.692	6.883	5.554	5.455	7.221	8.609	8.391	5.554	6.447	6.348	7.24	7.022	5.396	5.852	5.197	7.439	5.177	5.078	7.102	8.133	6.566	6.467	6.546	8.768	5.217	5.931	6.546	5.475	8.51	7.716	6.586	6.685
5.435	5.415	5.277	10.99	5.058	5.872	5.039	5.019	6.13	5.098	5.177	5.039	5.495	6.903	5.118	5.554	5.475	5.753	5.356	5.336	15.254	7.32	6.09	6.368	5.058	8.966	5.832	5.475	6.149	5.554	6.268	5.495	5.673	5.277	5.019	5.237	7.379	6.983	6.03	5.653	8.788	7.578	5.812	5.177	5.277	6.506	5.158	5.078	6.963	6.07
5.336	9.482	6.288	5.078	9.105	5.852	7.796	5.118	6.07	5.911	7.816	5.078	7.102	6.606	6.427	6.05	5.098	6.407	5.951	5.177	16.742	6.229	5.078	7.379	7.399	7.3	5.614	5.415	5.435	5.594	5.792	5.753	5.614	7.221	6.903	7.697	5.316	6.05	6.07	19.42	6.804	5.039	7.617	7.895	6.883	30.509	8.093	5.991	8.629	5.376
PLX
6.407	5.237	10.533	7.161	5.475	5.574	5.078	5.078	6.943	6.526	5.614	7.518	5.495	5.911	5.892	7.379	6.03	7.399	5.772	6.625	5.396	5.277	6.625	5.515	5.792	5.138	5.475	17.516	6.13	8.649	5.098	6.824	6.526	5.931	5.019	6.11	5.772	6.407	5.296	11.426	6.645	6.011	5.435	6.526	5.356	5.039	5.257	6.348	9.899	5.455
5.197	7.141	9.799	11.366	11.168	5.158	5.971	11.644	5.376	6.705	6.209	8.55	5.911	6.348	6.368	21.582	6.467	7.141	6.288	5.812	6.268	5.356	13.648	5.396	19.341	7.082	8.609	6.427	7.974	5.415	8.688	5.415	5.435	6.824	5.475	10.295	6.606	5.197	10.077	15.81	5.296	5.217	6.844	17.179	7.617	5.951	8.51	6.844	6.645	5.753
5.435	5.277	6.288	5.753	5.257	6.923	22.078	8.371	11.109	7.161	5.911	5.792	6.526	5.772	6.169	6.983	5.039	8.431	6.169	6.07	5.852	5.396	5.931	15.711	6.606	5.376	9.581	7.776	5.911	6.625	6.725	5.177	5.296	5.039	7.478	24.022	9.244	5.614	6.07	5.019	5.713	7.637	7.756	6.546	7.816	6.348	7.935	5.614	5.534	5.058
7.419	6.883	6.625	5.217	5.971	6.07	9.66	8.351	6.546	7.836	5.931	6.387	6.407	8.688	6.546	5.892	13.291	7.578	5.852	7.736	5.534	7.34	6.387	8.53	6.685	8.609	7.201	5.852	9.78	7.3	7.498	6.229	5.177	6.328	5.316	7.34	6.308	9.343	8.391	6.07	6.546	18.151	7.161	15.532	9.66	6.11	5.098	8.371	5.594	5.951
7.042	5.098	7.26	6.348	5.812	7.32	7.359	8.907	6.407	6.784	5.733	9.76	9.462	12.775	6.705	7.181	6.169	7.34	15.592	5.594	9.026	6.903	6.645	5.138	7.836	5.931	5.455	6.526	8.193	5.772	5.772	5.435	9.264	7.141	6.189	6.447	6.07	5.892	8.45	7.578	5.653	5.812	7.34	9.482	8.589	7.002	5.098	6.387	7.597	5.693
7.3	8.252	5.336	6.983	7.518	5.951	14.58	5.951	6.625	7.498	5.594	9.66	8.034	12.239	5.812	9.978	8.808	6.09	6.983	6.487	7.895	12.795	12.418	13.191	6.011	10.494	8.133	9.422	13.271	7.518	9.72	6.784	7.24	6.387	7.121	5.058	6.923	6.149	5.931	5.673	5.733	5.772	6.744	5.316	17.575	5.058	6.11	6.348	12.061	5.296
9.105	6.13	6.606	10.375	5.197	8.153	7.379	6.229	5.673	6.844	8.966	5.277	8.788	6.209	6.804	9.561	8.351	7.677	8.986	5.277	5.336	5.158	7.34	5.316	9.363	8.927	11.466	5.098	6.209	5.356	9.204	5.336	7.459	8.609	6.209	7.002	5.098	5.257	7.736	5.792	6.229	6.09	5.098	6.943	9.74	6.764	5.257	6.229	8.669	6.943
5.098	6.784	5.197	6.645	5.217	11.664	8.153	9.343	6.963	8.688	11.228	5.693	6.149	7.419	7.28	6.13	10.375	6.963	5.792	10.871	6.03	6.407	6.943	7.082	7.3	7.34	5.475	7.379	9.561	10.295	5.316	9.125	6.348	9.859	7.776	9.383	12.497	6.864	10.97	10.236	5.753	5.158	7.617	8.907	8.788	5.515	8.212	5.594	10.275	7.816
5.534	5.991	5.475	5.455	23.983	5.614	6.209	7.518	5.058	5.911	8.153	5.772	5.713	5.653	5.019	5.733	8.986	5.098	6.864	5.772	6.665	5.614	6.229	5.197	6.407	6.764	6.387	6.864	5.217	6.229	5.316	20.313	11.565	20.531	5.158	62.763	6.209	6.13	6.685	16.603	6.07	6.804	5.832	5.534	6.705	6.209	6.308	19.797	30.072	5.534
6.07	37.412	5.158	9.482	13.509	8.53	30.41	6.963	8.55	14.501	9.879	8.272	9.422	9.74	7.379	5.832	5.177	7.617	14.183	22.872	7.26	5.812	5.475	5.753	6.586	10.355	7.399	9.541	7.221	8.034	7.24	9.879	8.49	6.883	7.32	6.387	6.11	5.812	6.447	6.189	6.11	9.105	6.665	12.656	8.669	7.24	8.133	7.181	9.641	6.11
6.625	5.971	5.376	5.812	6.368	6.189	5.158	10.474	5.257	6.824	5.138	10.156	5.435	8.252	5.356	6.13	5.852	8.768	5.197	9.482	5.138	5.594	5.812	6.209	5.237	5.475	7.478	8.768	7.677	8.55	5.177	6.744	5.019	5.158	7.141	5.475	5.316	5.713	6.348	7.002	5.495	15.373	8.351	5.257	5.336	5.376	8.569	12.081	7.756	6.467
8.014	12.497	5.911	7.974	5.534	5.455	13.529	13.013	13.41	7.478	6.943	5.058	5.911	5.614	12.517	10.732	5.118	6.308	6.11	9.323	5.733	5.534	7.3	5.554	6.506	9.085	5.534	5.653	6.844	8.728	5.158	8.391	9.284	5.217	9.165	12.021	13.35	8.272	5.177	7.26	7.221	7.518	5.574	10.018	9.462	9.105	5.217	12.537	9.224	8.788
6.725	25.47	5.693	7.816	12.517	5.673	6.864	5.852	5.693	9.046	9.76	24.974	5.237	11.049	7.677	9.224	8.53	6.03	6.229	6.487	5.039	6.149	31.62	17.952	15.85	8.173	7.062	7.915	9.601	16.603	11.624	14.62	7.181	7.141	18.904	6.249	6.625	5.753	5.713	14.977	14.798	15.016	7.002	5.594	13.529	7.836	14.997	15.988	16.306	5.257
40.804	5.138	8.55	9.462	7.796	10.871	6.149	8.014	8.966	21.225	12.021	6.705	6.09	17.456	5.653	5.019	5.356	11.525	11.386	19.162	6.804	7.26	5.316	8.728	10.196	8.808	8.054	9.145	5.277	13.866	15.056	5.971	22.118	5.058	7.121	5.753	7.578	7.022	5.039	8.708	7.895	9.72	6.566	20.392	14.144	13.628	5.296	8.133	6.09	5.058
7.26	6.169	5.971	9.184	9.264	6.764	6.903	6.625	5.653	9.264	6.09	28.208	8.688	7.379	10.89	35.349	22.554	7.121	5.792	5.832	31.481	9.78	6.348	5.832	6.546	9.343	7.955	7.161	11.505	6.487	6.407	7.855	6.685	5.753	6.05	5.118	5.554	6.03	5.931	7.3	5.058	5.455	6.09	10.295	33.187	11.704	5.872	7.102	6.864	7.895
11.604	7.459	9.561	36.103	8.074	5.197	5.118	8.609	14.163	9.046	8.629	48.223	33.901	17.179	11.426	9.184	15.056	9.026	7.558	7.022	20.134	12.517	5.138	5.058	12.418	16.385	5.277	8.788	24.221	10.89	28.525	9.363	15.731	11.406	12.319	9.819	11.545	9.383	13.608	8.331	5.435	26.601	31.025	22.574	66.532	8.569	36.162	6.725	10.037	16.246
9.78	5.316	7.518	7.637	6.665	7.657	6.11	5.554	5.039	8.669	5.753	5.931	14.56	6.844	6.844	6.447	6.983	11.585	9.938	6.705	5.316	6.11	5.237	6.328	5.197	7.915	6.864	8.708	9.006	12.259	6.447	10.394	6.606	6.784	5.118	16.246	25.728	9.78	7.816	6.209	6.903	6.784	10.573	7.796	7.478	11.942	9.998	5.138	8.986	12.874
5.634	7.855	7.022	10.275	6.368	5.653	7.756	8.808	5.594	7.221	9.899	5.872	6.883	6.189	5.832	7.875	10.394	5.534	5.475	9.66	45.367	7.459	6.526	5.435	5.296	14.481	6.983	7.082	5.951	11.922	5.713	5.614	6.983	8.946	5.177	5.653	6.288	7.677	5.753	6.487	5.356	6.407	5.951	7.538	6.427	10.176	7.478	10.434	7.736	28.426
5.653	23.011	9.581	14.719	17.04	7.478	5.951	8.093	7.578	10.513	12.041	6.467	11.644	6.368	7.201	8.847	11.882	5.435	8.014	6.685	21.86	12.477	9.541	8.946	13.648	7.994	9.581	8.351	10.414	10.454	8.411	6.586	10.752	13.469	5.495	5.614	6.744	8.47	8.232	10.037	7.419	8.946	7.955	19.579	11.307	10.275	12.18	17.913	13.489	12.656
5.356	7.498	8.351	7.082	6.05	5.852	6.268	5.574	7.736	5.475	5.475	5.177	6.149	7.062	5.713	6.407	14.54	8.49	6.09	8.391	7.994	8.49	5.118	6.546	6.209	6.864	6.983	5.296	6.506	7.756	8.034	5.872	8.212	5.415	6.169	7.141	7.062	6.407	5.495	11.089	5.257	8.054	10.91	5.495	6.864	7.736	8.193	9.66	9.284	8.847
9.403	12.914	8.966	7.915	10.871	14.342	9.978	7.697	5.713	15.056	11.763	8.173	6.744	9.502	5.772	18.726	19.123	23.011	16.881	18.766	5.772	9.303	8.014	9.799	17.635	9.442	14.421	9.085	7.102	9.7	7.875	10.355	11.724	6.606	18.111	7.597	6.685	10.712	7.736	13.588	9.74	8.411	13.668	7.379	10.871	11.168	7.34	20.134	12.854	10.454
11.981	18.369	7.955	23.923	9.799	17.317	22.356	8.589	5.415	9.303	7.955	8.431	27.018	16.226	8.014	5.534	12.398	7.855	7.478	5.475	13.846	23.05	12.12	7.24	19.38	15.294	5.396	20.789	7.776	7.974	6.963	6.169	18.984	11.109	9.284	16.008	10.137	23.288	10.593	7.974	26.879	5.237	5.931	6.963	7.121	5.257	5.515	8.153	12.081	5.177
29.081	15.869	10.91	8.986	10.256	12.12	14.401	13.092	11.981	6.427	8.748	5.971	11.168	6.249	12.378	7.399	8.371	5.614	13.449	11.743	26.184	6.903	19.004	14.282	11.347	10.851	11.009	7.955	9.76	11.604	14.163	14.401	11.922	15.889	5.852	21.146	23.784	30.449	30.271	14.679	10.752	10.156	22.733	8.113	12.14	8.847	31.322	6.725	6.606	15.711
9.819	7.736	6.705	5.852	7.597	21.225	5.673	8.569	7.538	9.522	16.365	5.415	9.76	6.249	11.029	14.064	6.407	14.025	6.328	5.713	5.534	6.923	45.267	5.098	5.455	20.273	7.498	5.177	11.545	6.883	5.019	5.911	6.288	31.897	27.89	7.181	5.713	6.645	19.46	19.698	6.249	5.753	5.693	7.558	8.093	5.852	26.918	5.653	5.019	8.708
6.249	19.301	6.368	10.97	9.561	8.708	5.376	5.931	6.467	7.955	8.252	10.752	11.505	5.158	5.653	7.816	9.006	6.348	5.872	7.498	7.439	7.359	6.149	9.819	7.022	6.11	7.062	5.614	6.784	7.518	5.396	7.181	6.705	8.867	13.628	6.546	7.756	6.13	6.308	5.078	13.31	12.636	5.554	6.11	5.217	9.105	5.872	5.634	5.455	8.927
11.386	5.376	5.852	5.336	5.574	6.645	10.335	11.763	9.958	10.99	10.831	12.537	7.716	6.606	10.275	6.368	7.002	6.308	8.788	6.625	14.183	7.439	5.237	5.534	11.128	6.625	10.355	5.237	5.892	5.653	6.844	7.28	6.963	9.68	10.771	5.574	6.07	8.867	7.102	8.074	10.434	15.294	7.955	12.299	14.223	6.903	9.303	16.762	6.308	9.918
5.098	8.986	5.515	23.824	9.006	5.733	9.264	6.665	5.197	7.439	12.081	9.72	14.263	18.131	8.034	16.068	9.006	20.372	7.082	10.632	7.736	6.764	9.204	8.113	7.201	5.931	7.34	5.634	5.911	15.651	12.973	7.459	6.725	9.403	7.935	15.85	5.415	8.014	15.909	12.378	18.349	9.244	54.273	26.204	45.426	12.081	9.859	6.229	11.902	16.603
[truncated: 4,992 more columns]
